# Supplementary material for: Unprecedented islands of GGC and GCC repeats coincide with human evolution.
Source: Research Square preprint supplement (doi:10.21203/rs.3.rs-2552016/v1), 2023-06-14
Supplement: Supplementary file 1 [file 02843d214a308cec966f0ff1.xlsx]

## Sheet: Sheet1
STR	Start	End	link	Chr
(GCC)3	778875	778883	https://asia.ensembl.org/Homo_sapiens/Location/View?r=1:778875-778883;db=core	1
(GCC)3	904472	904480	https://asia.ensembl.org/Homo_sapiens/Location/View?r=1:904472-904480;db=core	1
(GCC)3	904630	904638	https://asia.ensembl.org/Homo_sapiens/Location/View?r=1:904630-904638;db=core	1
(GCC)3	904712	904720	https://asia.ensembl.org/Homo_sapiens/Location/View?r=1:904712-904720;db=core	1
(GGC)3	909981	909989	https://asia.ensembl.org/Homo_sapiens/Location/View?r=1:909981-909989;db=core	1
(GCC)3	923816	923824	https://asia.ensembl.org/Homo_sapiens/Location/View?r=1:923816-923824;db=core	1
(ggc)3	923910	923918	https://asia.ensembl.org/Homo_sapiens/Location/View?r=1:923910-923918;db=core	1
(GGC)3	924282	924290	https://asia.ensembl.org/Homo_sapiens/Location/View?r=1:924282-924290;db=core	1
(GCC)3	924950	924958	https://asia.ensembl.org/Homo_sapiens/Location/View?r=1:924950-924958;db=core	1
(GGC)3	930278	930286	https://asia.ensembl.org/Homo_sapiens/Location/View?r=1:930278-930286;db=core	1
(GGC)3	946439	946447	https://asia.ensembl.org/Homo_sapiens/Location/View?r=1:946439-946447;db=core	1
(gcc)4	999503	999514	https://asia.ensembl.org/Homo_sapiens/Location/View?r=1:999503-999514;db=core	1
(GGC)3	1006778	1006786	https://asia.ensembl.org/Homo_sapiens/Location/View?r=1:1006778-1006786;db=core	1
(GCC)3	1035509	1035517	https://asia.ensembl.org/Homo_sapiens/Location/View?r=1:1035509-1035517;db=core	1
(GCC)3	1116605	1116613	https://asia.ensembl.org/Homo_sapiens/Location/View?r=1:1116605-1116613;db=core	1
(GGC)3	1201180	1201188	https://asia.ensembl.org/Homo_sapiens/Location/View?r=1:1201180-1201188;db=core	1
(GCC)3	1220125	1220133	https://asia.ensembl.org/Homo_sapiens/Location/View?r=1:1220125-1220133;db=core	1
(GGC)4	1231799	1231810	https://asia.ensembl.org/Homo_sapiens/Location/View?r=1:1231799-1231810;db=core	1
(ggc)3	1232300	1232308	https://asia.ensembl.org/Homo_sapiens/Location/View?r=1:1232300-1232308;db=core	1
(GGC)3	1232920	1232928	https://asia.ensembl.org/Homo_sapiens/Location/View?r=1:1232920-1232928;db=core	1
(GCC)3	1273687	1273695	https://asia.ensembl.org/Homo_sapiens/Location/View?r=1:1273687-1273695;db=core	1
(GGC)3	1308318	1308326	https://asia.ensembl.org/Homo_sapiens/Location/View?r=1:1308318-1308326;db=core	1
(GGC)3	1312068	1312076	https://asia.ensembl.org/Homo_sapiens/Location/View?r=1:1312068-1312076;db=core	1
(GCC)3	1349225	1349233	https://asia.ensembl.org/Homo_sapiens/Location/View?r=1:1349225-1349233;db=core	1
(GGC)3	1374764	1374772	https://asia.ensembl.org/Homo_sapiens/Location/View?r=1:1374764-1374772;db=core	1
(gcc)7	1399283	1399303	https://asia.ensembl.org/Homo_sapiens/Location/View?r=1:1399283-1399303;db=core	1
(GCC)3	1420397	1420405	https://asia.ensembl.org/Homo_sapiens/Location/View?r=1:1420397-1420405;db=core	1
(GCC)4	1471934	1471945	https://asia.ensembl.org/Homo_sapiens/Location/View?r=1:1471934-1471945;db=core	1
(GCC)4	1512318	1512329	https://asia.ensembl.org/Homo_sapiens/Location/View?r=1:1512318-1512329;db=core	1
(gcc)3	1574177	1574185	https://asia.ensembl.org/Homo_sapiens/Location/View?r=1:1574177-1574185;db=core	1
(GGC)3	1574557	1574565	https://asia.ensembl.org/Homo_sapiens/Location/View?r=1:1574557-1574565;db=core	1
(GGC)3	1599965	1599973	https://asia.ensembl.org/Homo_sapiens/Location/View?r=1:1599965-1599973;db=core	1
(GGC)3	1616373	1616381	https://asia.ensembl.org/Homo_sapiens/Location/View?r=1:1616373-1616381;db=core	1
(GCC)3	1631098	1631106	https://asia.ensembl.org/Homo_sapiens/Location/View?r=1:1631098-1631106;db=core	1
(gcc)6	1658931	1658948	https://asia.ensembl.org/Homo_sapiens/Location/View?r=1:1658931-1658948;db=core	1
(GCC)3	1676365	1676373	https://asia.ensembl.org/Homo_sapiens/Location/View?r=1:1676365-1676373;db=core	1
(GCC)3	1739223	1739231	https://asia.ensembl.org/Homo_sapiens/Location/View?r=1:1739223-1739231;db=core	1
(GCC)3	1890515	1890523	https://asia.ensembl.org/Homo_sapiens/Location/View?r=1:1890515-1890523;db=core	1
(GCC)3	1974106	1974114	https://asia.ensembl.org/Homo_sapiens/Location/View?r=1:1974106-1974114;db=core	1
(GCC)3	2051333	2051341	https://asia.ensembl.org/Homo_sapiens/Location/View?r=1:2051333-2051341;db=core	1
(GCC)3	2061884	2061892	https://asia.ensembl.org/Homo_sapiens/Location/View?r=1:2061884-2061892;db=core	1
(GGC)3	2088735	2088743	https://asia.ensembl.org/Homo_sapiens/Location/View?r=1:2088735-2088743;db=core	1
(GCC)3	2204775	2204783	https://asia.ensembl.org/Homo_sapiens/Location/View?r=1:2204775-2204783;db=core	1
(GGC)4	2228262	2228273	https://asia.ensembl.org/Homo_sapiens/Location/View?r=1:2228262-2228273;db=core	1
(GGC)3	2228502	2228510	https://asia.ensembl.org/Homo_sapiens/Location/View?r=1:2228502-2228510;db=core	1
(GGC)3	2228550	2228558	https://asia.ensembl.org/Homo_sapiens/Location/View?r=1:2228550-2228558;db=core	1
(GGC)3	2228697	2228705	https://asia.ensembl.org/Homo_sapiens/Location/View?r=1:2228697-2228705;db=core	1
(GGC)3	2228771	2228779	https://asia.ensembl.org/Homo_sapiens/Location/View?r=1:2228771-2228779;db=core	1
(gcc)3	2228972	2228980	https://asia.ensembl.org/Homo_sapiens/Location/View?r=1:2228972-2228980;db=core	1
(gcc)4	2229005	2229016	https://asia.ensembl.org/Homo_sapiens/Location/View?r=1:2229005-2229016;db=core	1
(GGC)4	2280579	2280590	https://asia.ensembl.org/Homo_sapiens/Location/View?r=1:2280579-2280590;db=core	1
(GGC)4	2280622	2280633	https://asia.ensembl.org/Homo_sapiens/Location/View?r=1:2280622-2280633;db=core	1
(GGC)4	2280665	2280676	https://asia.ensembl.org/Homo_sapiens/Location/View?r=1:2280665-2280676;db=core	1
(GGC)4	2280708	2280719	https://asia.ensembl.org/Homo_sapiens/Location/View?r=1:2280708-2280719;db=core	1
(GGC)4	2280838	2280849	https://asia.ensembl.org/Homo_sapiens/Location/View?r=1:2280838-2280849;db=core	1
(GGC)4	2280881	2280892	https://asia.ensembl.org/Homo_sapiens/Location/View?r=1:2280881-2280892;db=core	1
(GGC)4	2280924	2280935	https://asia.ensembl.org/Homo_sapiens/Location/View?r=1:2280924-2280935;db=core	1
(GGC)4	2280967	2280978	https://asia.ensembl.org/Homo_sapiens/Location/View?r=1:2280967-2280978;db=core	1
(GGC)4	2281010	2281021	https://asia.ensembl.org/Homo_sapiens/Location/View?r=1:2281010-2281021;db=core	1
(GGC)4	2281053	2281064	https://asia.ensembl.org/Homo_sapiens/Location/View?r=1:2281053-2281064;db=core	1
(GGC)3	2281096	2281104	https://asia.ensembl.org/Homo_sapiens/Location/View?r=1:2281096-2281104;db=core	1
(GCC)3	2303933	2303941	https://asia.ensembl.org/Homo_sapiens/Location/View?r=1:2303933-2303941;db=core	1
(GGC)3	2315135	2315143	https://asia.ensembl.org/Homo_sapiens/Location/View?r=1:2315135-2315143;db=core	1
(GGC)3	2412484	2412492	https://asia.ensembl.org/Homo_sapiens/Location/View?r=1:2412484-2412492;db=core	1
(GCC)3	2449973	2449981	https://asia.ensembl.org/Homo_sapiens/Location/View?r=1:2449973-2449981;db=core	1
(ggc)3	2530298	2530306	https://asia.ensembl.org/Homo_sapiens/Location/View?r=1:2530298-2530306;db=core	1
(GCC)3	2540941	2540949	https://asia.ensembl.org/Homo_sapiens/Location/View?r=1:2540941-2540949;db=core	1
(GCC)3	2641620	2641628	https://asia.ensembl.org/Homo_sapiens/Location/View?r=1:2641620-2641628;db=core	1
(GCC)3	2641887	2641895	https://asia.ensembl.org/Homo_sapiens/Location/View?r=1:2641887-2641895;db=core	1
(GGC)3	3062339	3062347	https://asia.ensembl.org/Homo_sapiens/Location/View?r=1:3062339-3062347;db=core	1
(GCC)3	3068779	3068787	https://asia.ensembl.org/Homo_sapiens/Location/View?r=1:3068779-3068787;db=core	1
(ggc)8	3069056	3069079	https://asia.ensembl.org/Homo_sapiens/Location/View?r=1:3069056-3069079;db=core	1
(GGC)3	3081576	3081584	https://asia.ensembl.org/Homo_sapiens/Location/View?r=1:3081576-3081584;db=core	1
(GGC)3	3122846	3122854	https://asia.ensembl.org/Homo_sapiens/Location/View?r=1:3122846-3122854;db=core	1
(GGC)3	3186440	3186448	https://asia.ensembl.org/Homo_sapiens/Location/View?r=1:3186440-3186448;db=core	1
(GCC)3	3250459	3250467	https://asia.ensembl.org/Homo_sapiens/Location/View?r=1:3250459-3250467;db=core	1
(GGC)4	3454441	3454452	https://asia.ensembl.org/Homo_sapiens/Location/View?r=1:3454441-3454452;db=core	1
(GCC)3	3454651	3454659	https://asia.ensembl.org/Homo_sapiens/Location/View?r=1:3454651-3454659;db=core	1
(GGC)3	3472150	3472158	https://asia.ensembl.org/Homo_sapiens/Location/View?r=1:3472150-3472158;db=core	1
(GGC)3	3514959	3514967	https://asia.ensembl.org/Homo_sapiens/Location/View?r=1:3514959-3514967;db=core	1
(GGC)3	3602553	3602561	https://asia.ensembl.org/Homo_sapiens/Location/View?r=1:3602553-3602561;db=core	1
(GCC)3	3603764	3603772	https://asia.ensembl.org/Homo_sapiens/Location/View?r=1:3603764-3603772;db=core	1
(GCC)3	3624545	3624553	https://asia.ensembl.org/Homo_sapiens/Location/View?r=1:3624545-3624553;db=core	1
(GGC)3	3625153	3625161	https://asia.ensembl.org/Homo_sapiens/Location/View?r=1:3625153-3625161;db=core	1
(GCC)3	3650000	3650008	https://asia.ensembl.org/Homo_sapiens/Location/View?r=1:3650000-3650008;db=core	1
(GGC)3	3651726	3651734	https://asia.ensembl.org/Homo_sapiens/Location/View?r=1:3651726-3651734;db=core	1
(GCC)3	3651757	3651765	https://asia.ensembl.org/Homo_sapiens/Location/View?r=1:3651757-3651765;db=core	1
(GGC)3	3652063	3652071	https://asia.ensembl.org/Homo_sapiens/Location/View?r=1:3652063-3652071;db=core	1
(GGC)3	3698615	3698623	https://asia.ensembl.org/Homo_sapiens/Location/View?r=1:3698615-3698623;db=core	1
(GCC)3	3718155	3718163	https://asia.ensembl.org/Homo_sapiens/Location/View?r=1:3718155-3718163;db=core	1
(GGC)3	3732974	3732982	https://asia.ensembl.org/Homo_sapiens/Location/View?r=1:3732974-3732982;db=core	1
(GCC)3	3747250	3747258	https://asia.ensembl.org/Homo_sapiens/Location/View?r=1:3747250-3747258;db=core	1
(GCC)3	3796465	3796473	https://asia.ensembl.org/Homo_sapiens/Location/View?r=1:3796465-3796473;db=core	1
(GCC)3	4215472	4215480	https://asia.ensembl.org/Homo_sapiens/Location/View?r=1:4215472-4215480;db=core	1
(GGC)3	4784944	4784952	https://asia.ensembl.org/Homo_sapiens/Location/View?r=1:4784944-4784952;db=core	1
(GCC)3	5501400	5501408	https://asia.ensembl.org/Homo_sapiens/Location/View?r=1:5501400-5501408;db=core	1
(GCC)3	5840682	5840690	https://asia.ensembl.org/Homo_sapiens/Location/View?r=1:5840682-5840690;db=core	1
(ggc)3	6180290	6180298	https://asia.ensembl.org/Homo_sapiens/Location/View?r=1:6180290-6180298;db=core	1
(GCC)3	6180609	6180617	https://asia.ensembl.org/Homo_sapiens/Location/View?r=1:6180609-6180617;db=core	1
(GCC)3	6181037	6181045	https://asia.ensembl.org/Homo_sapiens/Location/View?r=1:6181037-6181045;db=core	1
(GGC)3	6235933	6235941	https://asia.ensembl.org/Homo_sapiens/Location/View?r=1:6235933-6235941;db=core	1
(gcc)4	6249421	6249432	https://asia.ensembl.org/Homo_sapiens/Location/View?r=1:6249421-6249432;db=core	1
(GGC)3	6249708	6249716	https://asia.ensembl.org/Homo_sapiens/Location/View?r=1:6249708-6249716;db=core	1
(GGC)3	6260967	6260975	https://asia.ensembl.org/Homo_sapiens/Location/View?r=1:6260967-6260975;db=core	1
(GCC)3	6393009	6393017	https://asia.ensembl.org/Homo_sapiens/Location/View?r=1:6393009-6393017;db=core	1
(GGC)3	6393114	6393122	https://asia.ensembl.org/Homo_sapiens/Location/View?r=1:6393114-6393122;db=core	1
(gcc)5	6456007	6456021	https://asia.ensembl.org/Homo_sapiens/Location/View?r=1:6456007-6456021;db=core	1
(GCC)4	6497400	6497411	https://asia.ensembl.org/Homo_sapiens/Location/View?r=1:6497400-6497411;db=core	1
(GCC)3	6554278	6554286	https://asia.ensembl.org/Homo_sapiens/Location/View?r=1:6554278-6554286;db=core	1
(GGC)3	6602646	6602654	https://asia.ensembl.org/Homo_sapiens/Location/View?r=1:6602646-6602654;db=core	1
(GCC)4	6613353	6613364	https://asia.ensembl.org/Homo_sapiens/Location/View?r=1:6613353-6613364;db=core	1
(GCC)3	6613547	6613555	https://asia.ensembl.org/Homo_sapiens/Location/View?r=1:6613547-6613555;db=core	1
(gcc)4	6614041	6614052	https://asia.ensembl.org/Homo_sapiens/Location/View?r=1:6614041-6614052;db=core	1
(GCC)3	6614479	6614487	https://asia.ensembl.org/Homo_sapiens/Location/View?r=1:6614479-6614487;db=core	1
(GGC)3	6770858	6770866	https://asia.ensembl.org/Homo_sapiens/Location/View?r=1:6770858-6770866;db=core	1
(GGC)3	7149757	7149765	https://asia.ensembl.org/Homo_sapiens/Location/View?r=1:7149757-7149765;db=core	1
(GCC)3	7199552	7199560	https://asia.ensembl.org/Homo_sapiens/Location/View?r=1:7199552-7199560;db=core	1
(GGC)3	7406739	7406747	https://asia.ensembl.org/Homo_sapiens/Location/View?r=1:7406739-7406747;db=core	1
(GGC)3	7664260	7664268	https://asia.ensembl.org/Homo_sapiens/Location/View?r=1:7664260-7664268;db=core	1
(gcc)3	7704011	7704019	https://asia.ensembl.org/Homo_sapiens/Location/View?r=1:7704011-7704019;db=core	1
(GGC)3	7704942	7704950	https://asia.ensembl.org/Homo_sapiens/Location/View?r=1:7704942-7704950;db=core	1
(gcc)3	7771362	7771370	https://asia.ensembl.org/Homo_sapiens/Location/View?r=1:7771362-7771370;db=core	1
(GCC)3	7942473	7942481	https://asia.ensembl.org/Homo_sapiens/Location/View?r=1:7942473-7942481;db=core	1
(gcc)4	8026318	8026329	https://asia.ensembl.org/Homo_sapiens/Location/View?r=1:8026318-8026329;db=core	1
(GCC)3	8423842	8423850	https://asia.ensembl.org/Homo_sapiens/Location/View?r=1:8423842-8423850;db=core	1
(GCC)3	8703501	8703509	https://asia.ensembl.org/Homo_sapiens/Location/View?r=1:8703501-8703509;db=core	1
(GGC)3	8817944	8817952	https://asia.ensembl.org/Homo_sapiens/Location/View?r=1:8817944-8817952;db=core	1
(GGC)3	9292656	9292664	https://asia.ensembl.org/Homo_sapiens/Location/View?r=1:9292656-9292664;db=core	1
(gcc)6	9823862	9823879	https://asia.ensembl.org/Homo_sapiens/Location/View?r=1:9823862-9823879;db=core	1
(GGC)3	9823965	9823973	https://asia.ensembl.org/Homo_sapiens/Location/View?r=1:9823965-9823973;db=core	1
(GGC)3	9831194	9831202	https://asia.ensembl.org/Homo_sapiens/Location/View?r=1:9831194-9831202;db=core	1
(ggc)4	9997346	9997357	https://asia.ensembl.org/Homo_sapiens/Location/View?r=1:9997346-9997357;db=core	1
(GCC)3	10638912	10638920	https://asia.ensembl.org/Homo_sapiens/Location/View?r=1:10638912-10638920;db=core	1
(ggc)3	10639253	10639261	https://asia.ensembl.org/Homo_sapiens/Location/View?r=1:10639253-10639261;db=core	1
(GCC)4	10657254	10657265	https://asia.ensembl.org/Homo_sapiens/Location/View?r=1:10657254-10657265;db=core	1
(GGC)3	10672852	10672860	https://asia.ensembl.org/Homo_sapiens/Location/View?r=1:10672852-10672860;db=core	1
(GGC)3	10678141	10678149	https://asia.ensembl.org/Homo_sapiens/Location/View?r=1:10678141-10678149;db=core	1
(GGC)3	11259382	11259390	https://asia.ensembl.org/Homo_sapiens/Location/View?r=1:11259382-11259390;db=core	1
(GCC)3	11262471	11262479	https://asia.ensembl.org/Homo_sapiens/Location/View?r=1:11262471-11262479;db=core	1
(GGC)3	11479131	11479139	https://asia.ensembl.org/Homo_sapiens/Location/View?r=1:11479131-11479139;db=core	1
(GCC)3	11479298	11479306	https://asia.ensembl.org/Homo_sapiens/Location/View?r=1:11479298-11479306;db=core	1
(GCC)3	11516128	11516136	https://asia.ensembl.org/Homo_sapiens/Location/View?r=1:11516128-11516136;db=core	1
(GGC)3	11589876	11589884	https://asia.ensembl.org/Homo_sapiens/Location/View?r=1:11589876-11589884;db=core	1
(ggc)3	12008356	12008364	https://asia.ensembl.org/Homo_sapiens/Location/View?r=1:12008356-12008364;db=core	1
(GCC)3	12548887	12548895	https://asia.ensembl.org/Homo_sapiens/Location/View?r=1:12548887-12548895;db=core	1
(GGC)3	13700208	13700216	https://asia.ensembl.org/Homo_sapiens/Location/View?r=1:13700208-13700216;db=core	1
(GGC)3	13749596	13749604	https://asia.ensembl.org/Homo_sapiens/Location/View?r=1:13749596-13749604;db=core	1
(GGC)3	14962843	14962851	https://asia.ensembl.org/Homo_sapiens/Location/View?r=1:14962843-14962851;db=core	1
(GCC)3	15034889	15034897	https://asia.ensembl.org/Homo_sapiens/Location/View?r=1:15034889-15034897;db=core	1
(GGC)3	15272226	15272234	https://asia.ensembl.org/Homo_sapiens/Location/View?r=1:15272226-15272234;db=core	1
(gcc)3	15305749	15305757	https://asia.ensembl.org/Homo_sapiens/Location/View?r=1:15305749-15305757;db=core	1
(GGC)3	15410028	15410036	https://asia.ensembl.org/Homo_sapiens/Location/View?r=1:15410028-15410036;db=core	1
(GGC)3	15427169	15427177	https://asia.ensembl.org/Homo_sapiens/Location/View?r=1:15427169-15427177;db=core	1
(GGC)3	15617477	15617485	https://asia.ensembl.org/Homo_sapiens/Location/View?r=1:15617477-15617485;db=core	1
(gcc)5	15684299	15684313	https://asia.ensembl.org/Homo_sapiens/Location/View?r=1:15684299-15684313;db=core	1
(GGC)3	15684470	15684478	https://asia.ensembl.org/Homo_sapiens/Location/View?r=1:15684470-15684478;db=core	1
(ggc)4	15684510	15684521	https://asia.ensembl.org/Homo_sapiens/Location/View?r=1:15684510-15684521;db=core	1
(GCC)3	15770507	15770515	https://asia.ensembl.org/Homo_sapiens/Location/View?r=1:15770507-15770515;db=core	1
(GGC)3	15834976	15834984	https://asia.ensembl.org/Homo_sapiens/Location/View?r=1:15834976-15834984;db=core	1
(gcc)3	15847933	15847941	https://asia.ensembl.org/Homo_sapiens/Location/View?r=1:15847933-15847941;db=core	1
(gcc)6	15847963	15847980	https://asia.ensembl.org/Homo_sapiens/Location/View?r=1:15847963-15847980;db=core	1
(GGC)3	15945794	15945802	https://asia.ensembl.org/Homo_sapiens/Location/View?r=1:15945794-15945802;db=core	1
(GCC)3	16035281	16035289	https://asia.ensembl.org/Homo_sapiens/Location/View?r=1:16035281-16035289;db=core	1
(GCC)3	16058540	16058548	https://asia.ensembl.org/Homo_sapiens/Location/View?r=1:16058540-16058548;db=core	1
(GGC)3	16167998	16168006	https://asia.ensembl.org/Homo_sapiens/Location/View?r=1:16167998-16168006;db=core	1
(GCC)3	16232190	16232198	https://asia.ensembl.org/Homo_sapiens/Location/View?r=1:16232190-16232198;db=core	1
(GGC)3	16692483	16692491	https://asia.ensembl.org/Homo_sapiens/Location/View?r=1:16692483-16692491;db=core	1
(GGC)4	16693383	16693394	https://asia.ensembl.org/Homo_sapiens/Location/View?r=1:16693383-16693394;db=core	1
(ggc)8	16699526	16699549	https://asia.ensembl.org/Homo_sapiens/Location/View?r=1:16699526-16699549;db=core	1
(ggc)3	17107452	17107460	https://asia.ensembl.org/Homo_sapiens/Location/View?r=1:17107452-17107460;db=core	1
(gcc)3	17343754	17343762	https://asia.ensembl.org/Homo_sapiens/Location/View?r=1:17343754-17343762;db=core	1
(GCC)3	17438367	17438375	https://asia.ensembl.org/Homo_sapiens/Location/View?r=1:17438367-17438375;db=core	1
(GCC)5	17438485	17438499	https://asia.ensembl.org/Homo_sapiens/Location/View?r=1:17438485-17438499;db=core	1
(GCC)3	17439286	17439294	https://asia.ensembl.org/Homo_sapiens/Location/View?r=1:17439286-17439294;db=core	1
(GGC)3	17539812	17539820	https://asia.ensembl.org/Homo_sapiens/Location/View?r=1:17539812-17539820;db=core	1
(gcc)3	17692606	17692614	https://asia.ensembl.org/Homo_sapiens/Location/View?r=1:17692606-17692614;db=core	1
(gcc)3	18573686	18573694	https://asia.ensembl.org/Homo_sapiens/Location/View?r=1:18573686-18573694;db=core	1
(GGC)3	18632453	18632461	https://asia.ensembl.org/Homo_sapiens/Location/View?r=1:18632453-18632461;db=core	1
(GCC)3	18636911	18636919	https://asia.ensembl.org/Homo_sapiens/Location/View?r=1:18636911-18636919;db=core	1
(GCC)3	18644034	18644042	https://asia.ensembl.org/Homo_sapiens/Location/View?r=1:18644034-18644042;db=core	1
(ggc)3	18716975	18716983	https://asia.ensembl.org/Homo_sapiens/Location/View?r=1:18716975-18716983;db=core	1
(gcc)3	18897836	18897844	https://asia.ensembl.org/Homo_sapiens/Location/View?r=1:18897836-18897844;db=core	1
(GGC)3	18948622	18948630	https://asia.ensembl.org/Homo_sapiens/Location/View?r=1:18948622-18948630;db=core	1
(GCC)3	18955888	18955896	https://asia.ensembl.org/Homo_sapiens/Location/View?r=1:18955888-18955896;db=core	1
(GCC)3	19210057	19210065	https://asia.ensembl.org/Homo_sapiens/Location/View?r=1:19210057-19210065;db=core	1
(gcc)3	19210216	19210224	https://asia.ensembl.org/Homo_sapiens/Location/View?r=1:19210216-19210224;db=core	1
(GGC)3	19251686	19251694	https://asia.ensembl.org/Homo_sapiens/Location/View?r=1:19251686-19251694;db=core	1
(GGC)3	19469605	19469613	https://asia.ensembl.org/Homo_sapiens/Location/View?r=1:19469605-19469613;db=core	1
(ggc)5	19485441	19485455	https://asia.ensembl.org/Homo_sapiens/Location/View?r=1:19485441-19485455;db=core	1
(GCC)3	19485570	19485578	https://asia.ensembl.org/Homo_sapiens/Location/View?r=1:19485570-19485578;db=core	1
(ggc)5	19882642	19882656	https://asia.ensembl.org/Homo_sapiens/Location/View?r=1:19882642-19882656;db=core	1
(GCC)3	20366211	20366219	https://asia.ensembl.org/Homo_sapiens/Location/View?r=1:20366211-20366219;db=core	1
(GGC)3	20485799	20485807	https://asia.ensembl.org/Homo_sapiens/Location/View?r=1:20485799-20485807;db=core	1
(GCC)3	20553713	20553721	https://asia.ensembl.org/Homo_sapiens/Location/View?r=1:20553713-20553721;db=core	1
(GGC)3	20732155	20732163	https://asia.ensembl.org/Homo_sapiens/Location/View?r=1:20732155-20732163;db=core	1
(GGC)3	20786666	20786674	https://asia.ensembl.org/Homo_sapiens/Location/View?r=1:20786666-20786674;db=core	1
(gcc)11	21176231	21176263	https://asia.ensembl.org/Homo_sapiens/Location/View?r=1:21176231-21176263;db=core	1
(gcc)3	21176270	21176278	https://asia.ensembl.org/Homo_sapiens/Location/View?r=1:21176270-21176278;db=core	1
(gcc)5	21176303	21176317	https://asia.ensembl.org/Homo_sapiens/Location/View?r=1:21176303-21176317;db=core	1
(GGC)3	21428218	21428226	https://asia.ensembl.org/Homo_sapiens/Location/View?r=1:21428218-21428226;db=core	1
(GGC)3	21431732	21431740	https://asia.ensembl.org/Homo_sapiens/Location/View?r=1:21431732-21431740;db=core	1
(GCC)3	21587198	21587206	https://asia.ensembl.org/Homo_sapiens/Location/View?r=1:21587198-21587206;db=core	1
(GCC)5	21651825	21651839	https://asia.ensembl.org/Homo_sapiens/Location/View?r=1:21651825-21651839;db=core	1
(gcc)3	21652116	21652124	https://asia.ensembl.org/Homo_sapiens/Location/View?r=1:21652116-21652124;db=core	1
(gcc)3	21782998	21783006	https://asia.ensembl.org/Homo_sapiens/Location/View?r=1:21782998-21783006;db=core	1
(GGC)3	22142691	22142699	https://asia.ensembl.org/Homo_sapiens/Location/View?r=1:22142691-22142699;db=core	1
(GCC)3	22143421	22143429	https://asia.ensembl.org/Homo_sapiens/Location/View?r=1:22143421-22143429;db=core	1
(ggc)6	22563454	22563471	https://asia.ensembl.org/Homo_sapiens/Location/View?r=1:22563454-22563471;db=core	1
(GGC)3	22710857	22710865	https://asia.ensembl.org/Homo_sapiens/Location/View?r=1:22710857-22710865;db=core	1
(GGC)3	23094182	23094190	https://asia.ensembl.org/Homo_sapiens/Location/View?r=1:23094182-23094190;db=core	1
(GGC)3	23484055	23484063	https://asia.ensembl.org/Homo_sapiens/Location/View?r=1:23484055-23484063;db=core	1
(GCC)3	23558110	23558118	https://asia.ensembl.org/Homo_sapiens/Location/View?r=1:23558110-23558118;db=core	1
(gcc)8	23619568	23619591	https://asia.ensembl.org/Homo_sapiens/Location/View?r=1:23619568-23619591;db=core	1
(GCC)3	23743923	23743931	https://asia.ensembl.org/Homo_sapiens/Location/View?r=1:23743923-23743931;db=core	1
(GCC)3	23825325	23825333	https://asia.ensembl.org/Homo_sapiens/Location/View?r=1:23825325-23825333;db=core	1
(ggc)6	23903079	23903096	https://asia.ensembl.org/Homo_sapiens/Location/View?r=1:23903079-23903096;db=core	1
(GGC)3	23959726	23959734	https://asia.ensembl.org/Homo_sapiens/Location/View?r=1:23959726-23959734;db=core	1
(GGC)3	23980255	23980263	https://asia.ensembl.org/Homo_sapiens/Location/View?r=1:23980255-23980263;db=core	1
(GCC)3	24297700	24297708	https://asia.ensembl.org/Homo_sapiens/Location/View?r=1:24297700-24297708;db=core	1
(GCC)4	24322324	24322335	https://asia.ensembl.org/Homo_sapiens/Location/View?r=1:24322324-24322335;db=core	1
(GGC)3	24556098	24556106	https://asia.ensembl.org/Homo_sapiens/Location/View?r=1:24556098-24556106;db=core	1
(GGC)3	24745834	24745842	https://asia.ensembl.org/Homo_sapiens/Location/View?r=1:24745834-24745842;db=core	1
(gcc)5	24929787	24929801	https://asia.ensembl.org/Homo_sapiens/Location/View?r=1:24929787-24929801;db=core	1
(GCC)3	24930189	24930197	https://asia.ensembl.org/Homo_sapiens/Location/View?r=1:24930189-24930197;db=core	1
(GCC)3	25554034	25554042	https://asia.ensembl.org/Homo_sapiens/Location/View?r=1:25554034-25554042;db=core	1
(GCC)3	25783800	25783808	https://asia.ensembl.org/Homo_sapiens/Location/View?r=1:25783800-25783808;db=core	1
(gcc)3	25800211	25800219	https://asia.ensembl.org/Homo_sapiens/Location/View?r=1:25800211-25800219;db=core	1
(GCC)3	25800344	25800352	https://asia.ensembl.org/Homo_sapiens/Location/View?r=1:25800344-25800352;db=core	1
(GCC)3	25800356	25800364	https://asia.ensembl.org/Homo_sapiens/Location/View?r=1:25800356-25800364;db=core	1
(GCC)3	25808618	25808626	https://asia.ensembl.org/Homo_sapiens/Location/View?r=1:25808618-25808626;db=core	1
(GCC)3	25905738	25905746	https://asia.ensembl.org/Homo_sapiens/Location/View?r=1:25905738-25905746;db=core	1
(GCC)3	25906358	25906366	https://asia.ensembl.org/Homo_sapiens/Location/View?r=1:25906358-25906366;db=core	1
(GGC)3	26035867	26035875	https://asia.ensembl.org/Homo_sapiens/Location/View?r=1:26035867-26035875;db=core	1
(ggc)3	26111830	26111838	https://asia.ensembl.org/Homo_sapiens/Location/View?r=1:26111830-26111838;db=core	1
(ggc)5	26161963	26161977	https://asia.ensembl.org/Homo_sapiens/Location/View?r=1:26161963-26161977;db=core	1
(GGC)3	26529908	26529916	https://asia.ensembl.org/Homo_sapiens/Location/View?r=1:26529908-26529916;db=core	1
(GCC)3	26695590	26695598	https://asia.ensembl.org/Homo_sapiens/Location/View?r=1:26695590-26695598;db=core	1
(gcc)5	26696181	26696195	https://asia.ensembl.org/Homo_sapiens/Location/View?r=1:26696181-26696195;db=core	1
(gcc)3	26696208	26696216	https://asia.ensembl.org/Homo_sapiens/Location/View?r=1:26696208-26696216;db=core	1
(GGC)5	26696516	26696530	https://asia.ensembl.org/Homo_sapiens/Location/View?r=1:26696516-26696530;db=core	1
(GGC)4	26696649	26696660	https://asia.ensembl.org/Homo_sapiens/Location/View?r=1:26696649-26696660;db=core	1
(gcc)4	26817331	26817342	https://asia.ensembl.org/Homo_sapiens/Location/View?r=1:26817331-26817342;db=core	1
(GCC)3	26826991	26826999	https://asia.ensembl.org/Homo_sapiens/Location/View?r=1:26826991-26826999;db=core	1
(GCC)3	27012565	27012573	https://asia.ensembl.org/Homo_sapiens/Location/View?r=1:27012565-27012573;db=core	1
(GCC)4	27322232	27322243	https://asia.ensembl.org/Homo_sapiens/Location/View?r=1:27322232-27322243;db=core	1
(GCC)3	27350103	27350111	https://asia.ensembl.org/Homo_sapiens/Location/View?r=1:27350103-27350111;db=core	1
(ggc)3	27522504	27522512	https://asia.ensembl.org/Homo_sapiens/Location/View?r=1:27522504-27522512;db=core	1
(GGC)3	27536123	27536131	https://asia.ensembl.org/Homo_sapiens/Location/View?r=1:27536123-27536131;db=core	1
(GCC)3	27725998	27726006	https://asia.ensembl.org/Homo_sapiens/Location/View?r=1:27725998-27726006;db=core	1
(GGC)3	27726174	27726182	https://asia.ensembl.org/Homo_sapiens/Location/View?r=1:27726174-27726182;db=core	1
(GCC)3	28096411	28096419	https://asia.ensembl.org/Homo_sapiens/Location/View?r=1:28096411-28096419;db=core	1
(gcc)3	28263842	28263850	https://asia.ensembl.org/Homo_sapiens/Location/View?r=1:28263842-28263850;db=core	1
(GCC)3	28369985	28369993	https://asia.ensembl.org/Homo_sapiens/Location/View?r=1:28369985-28369993;db=core	1
(GGC)3	28668742	28668750	https://asia.ensembl.org/Homo_sapiens/Location/View?r=1:28668742-28668750;db=core	1
(GCC)5	28668991	28669005	https://asia.ensembl.org/Homo_sapiens/Location/View?r=1:28668991-28669005;db=core	1
(GCC)4	28737059	28737070	https://asia.ensembl.org/Homo_sapiens/Location/View?r=1:28737059-28737070;db=core	1
(ggc)5	28914777	28914791	https://asia.ensembl.org/Homo_sapiens/Location/View?r=1:28914777-28914791;db=core	1
(ggc)3	29121749	29121757	https://asia.ensembl.org/Homo_sapiens/Location/View?r=1:29121749-29121757;db=core	1
(ggc)3	29181797	29181805	https://asia.ensembl.org/Homo_sapiens/Location/View?r=1:29181797-29181805;db=core	1
(GCC)3	29237676	29237684	https://asia.ensembl.org/Homo_sapiens/Location/View?r=1:29237676-29237684;db=core	1
(GGC)3	29478454	29478462	https://asia.ensembl.org/Homo_sapiens/Location/View?r=1:29478454-29478462;db=core	1
(gcc)3	29550361	29550369	https://asia.ensembl.org/Homo_sapiens/Location/View?r=1:29550361-29550369;db=core	1
(GCC)3	30342909	30342917	https://asia.ensembl.org/Homo_sapiens/Location/View?r=1:30342909-30342917;db=core	1
(GGC)3	30787718	30787726	https://asia.ensembl.org/Homo_sapiens/Location/View?r=1:30787718-30787726;db=core	1
(gcc)3	30807402	30807410	https://asia.ensembl.org/Homo_sapiens/Location/View?r=1:30807402-30807410;db=core	1
(GCC)3	30856374	30856382	https://asia.ensembl.org/Homo_sapiens/Location/View?r=1:30856374-30856382;db=core	1
(ggc)3	30908586	30908594	https://asia.ensembl.org/Homo_sapiens/Location/View?r=1:30908586-30908594;db=core	1
(ggc)3	30908664	30908672	https://asia.ensembl.org/Homo_sapiens/Location/View?r=1:30908664-30908672;db=core	1
(GCC)3	31239598	31239606	https://asia.ensembl.org/Homo_sapiens/Location/View?r=1:31239598-31239606;db=core	1
(GCC)3	31413256	31413264	https://asia.ensembl.org/Homo_sapiens/Location/View?r=1:31413256-31413264;db=core	1
(gcc)3	31459947	31459955	https://asia.ensembl.org/Homo_sapiens/Location/View?r=1:31459947-31459955;db=core	1
(GGC)3	31589022	31589030	https://asia.ensembl.org/Homo_sapiens/Location/View?r=1:31589022-31589030;db=core	1
(GCC)7	31764107	31764127	https://asia.ensembl.org/Homo_sapiens/Location/View?r=1:31764107-31764127;db=core	1
(GGC)3	31764206	31764214	https://asia.ensembl.org/Homo_sapiens/Location/View?r=1:31764206-31764214;db=core	1
(ggc)5	31772035	31772049	https://asia.ensembl.org/Homo_sapiens/Location/View?r=1:31772035-31772049;db=core	1
(ggc)4	31938089	31938100	https://asia.ensembl.org/Homo_sapiens/Location/View?r=1:31938089-31938100;db=core	1
(GGC)3	31944799	31944807	https://asia.ensembl.org/Homo_sapiens/Location/View?r=1:31944799-31944807;db=core	1
(GCC)3	32094903	32094911	https://asia.ensembl.org/Homo_sapiens/Location/View?r=1:32094903-32094911;db=core	1
(GGC)3	32361782	32361790	https://asia.ensembl.org/Homo_sapiens/Location/View?r=1:32361782-32361790;db=core	1
(ggc)3	32471037	32471045	https://asia.ensembl.org/Homo_sapiens/Location/View?r=1:32471037-32471045;db=core	1
(ggc)6	32500490	32500507	https://asia.ensembl.org/Homo_sapiens/Location/View?r=1:32500490-32500507;db=core	1
(GGC)3	32500663	32500671	https://asia.ensembl.org/Homo_sapiens/Location/View?r=1:32500663-32500671;db=core	1
(GGC)7	32500829	32500849	https://asia.ensembl.org/Homo_sapiens/Location/View?r=1:32500829-32500849;db=core	1
(GGC)3	32539665	32539673	https://asia.ensembl.org/Homo_sapiens/Location/View?r=1:32539665-32539673;db=core	1
(GGC)3	32539848	32539856	https://asia.ensembl.org/Homo_sapiens/Location/View?r=1:32539848-32539856;db=core	1
(GCC)3	32765785	32765793	https://asia.ensembl.org/Homo_sapiens/Location/View?r=1:32765785-32765793;db=core	1
(ggc)3	32804408	32804416	https://asia.ensembl.org/Homo_sapiens/Location/View?r=1:32804408-32804416;db=core	1
(GGC)3	32870928	32870936	https://asia.ensembl.org/Homo_sapiens/Location/View?r=1:32870928-32870936;db=core	1
(ggc)3	32964491	32964499	https://asia.ensembl.org/Homo_sapiens/Location/View?r=1:32964491-32964499;db=core	1
(ggc)3	32964512	32964520	https://asia.ensembl.org/Homo_sapiens/Location/View?r=1:32964512-32964520;db=core	1
(gcc)3	32964762	32964770	https://asia.ensembl.org/Homo_sapiens/Location/View?r=1:32964762-32964770;db=core	1
(gcc)4	33051201	33051212	https://asia.ensembl.org/Homo_sapiens/Location/View?r=1:33051201-33051212;db=core	1
(GGC)3	33080926	33080934	https://asia.ensembl.org/Homo_sapiens/Location/View?r=1:33080926-33080934;db=core	1
(GGC)3	33082196	33082204	https://asia.ensembl.org/Homo_sapiens/Location/View?r=1:33082196-33082204;db=core	1
(ggc)7	33256172	33256192	https://asia.ensembl.org/Homo_sapiens/Location/View?r=1:33256172-33256192;db=core	1
(GGC)3	33349829	33349837	https://asia.ensembl.org/Homo_sapiens/Location/View?r=1:33349829-33349837;db=core	1
(ggc)3	33355141	33355149	https://asia.ensembl.org/Homo_sapiens/Location/View?r=1:33355141-33355149;db=core	1
(ggc)3	33356899	33356907	https://asia.ensembl.org/Homo_sapiens/Location/View?r=1:33356899-33356907;db=core	1
(GGC)3	34164171	34164179	https://asia.ensembl.org/Homo_sapiens/Location/View?r=1:34164171-34164179;db=core	1
(ggc)3	34164960	34164968	https://asia.ensembl.org/Homo_sapiens/Location/View?r=1:34164960-34164968;db=core	1
(ggc)3	34164972	34164980	https://asia.ensembl.org/Homo_sapiens/Location/View?r=1:34164972-34164980;db=core	1
(GGC)3	34176792	34176800	https://asia.ensembl.org/Homo_sapiens/Location/View?r=1:34176792-34176800;db=core	1
(GCC)3	34866774	34866782	https://asia.ensembl.org/Homo_sapiens/Location/View?r=1:34866774-34866782;db=core	1
(GCC)3	35192172	35192180	https://asia.ensembl.org/Homo_sapiens/Location/View?r=1:35192172-35192180;db=core	1
(ggc)3	35192747	35192755	https://asia.ensembl.org/Homo_sapiens/Location/View?r=1:35192747-35192755;db=core	1
(gcc)3	35192977	35192985	https://asia.ensembl.org/Homo_sapiens/Location/View?r=1:35192977-35192985;db=core	1
(GGC)3	35574378	35574386	https://asia.ensembl.org/Homo_sapiens/Location/View?r=1:35574378-35574386;db=core	1
(ggc)8	35808170	35808193	https://asia.ensembl.org/Homo_sapiens/Location/View?r=1:35808170-35808193;db=core	1
(ggc)3	35883280	35883288	https://asia.ensembl.org/Homo_sapiens/Location/View?r=1:35883280-35883288;db=core	1
(gcc)6	36156364	36156381	https://asia.ensembl.org/Homo_sapiens/Location/View?r=1:36156364-36156381;db=core	1
(GCC)8	36385860	36385883	https://asia.ensembl.org/Homo_sapiens/Location/View?r=1:36385860-36385883;db=core	1
(GCC)3	37033239	37033247	https://asia.ensembl.org/Homo_sapiens/Location/View?r=1:37033239-37033247;db=core	1
(GCC)3	37034483	37034491	https://asia.ensembl.org/Homo_sapiens/Location/View?r=1:37034483-37034491;db=core	1
(GGC)4	37514760	37514771	https://asia.ensembl.org/Homo_sapiens/Location/View?r=1:37514760-37514771;db=core	1
(GGC)3	38012804	38012812	https://asia.ensembl.org/Homo_sapiens/Location/View?r=1:38012804-38012812;db=core	1
(gcc)4	38046029	38046040	https://asia.ensembl.org/Homo_sapiens/Location/View?r=1:38046029-38046040;db=core	1
(gcc)5	38046230	38046244	https://asia.ensembl.org/Homo_sapiens/Location/View?r=1:38046230-38046244;db=core	1
(gcc)4	38046446	38046457	https://asia.ensembl.org/Homo_sapiens/Location/View?r=1:38046446-38046457;db=core	1
(gcc)8	38046636	38046659	https://asia.ensembl.org/Homo_sapiens/Location/View?r=1:38046636-38046659;db=core	1
(GCC)4	38046765	38046776	https://asia.ensembl.org/Homo_sapiens/Location/View?r=1:38046765-38046776;db=core	1
(GCC)3	38050853	38050861	https://asia.ensembl.org/Homo_sapiens/Location/View?r=1:38050853-38050861;db=core	1
(ggc)3	38090216	38090224	https://asia.ensembl.org/Homo_sapiens/Location/View?r=1:38090216-38090224;db=core	1
(ggc)3	38134012	38134020	https://asia.ensembl.org/Homo_sapiens/Location/View?r=1:38134012-38134020;db=core	1
(ggc)4	38578421	38578432	https://asia.ensembl.org/Homo_sapiens/Location/View?r=1:38578421-38578432;db=core	1
(GCC)3	38859327	38859335	https://asia.ensembl.org/Homo_sapiens/Location/View?r=1:38859327-38859335;db=core	1
(gcc)4	38859655	38859666	https://asia.ensembl.org/Homo_sapiens/Location/View?r=1:38859655-38859666;db=core	1
(gcc)3	38859700	38859708	https://asia.ensembl.org/Homo_sapiens/Location/View?r=1:38859700-38859708;db=core	1
(gcc)4	38991511	38991522	https://asia.ensembl.org/Homo_sapiens/Location/View?r=1:38991511-38991522;db=core	1
(gcc)4	39081485	39081496	https://asia.ensembl.org/Homo_sapiens/Location/View?r=1:39081485-39081496;db=core	1
(gcc)5	39105321	39105335	https://asia.ensembl.org/Homo_sapiens/Location/View?r=1:39105321-39105335;db=core	1
(GCC)4	39105549	39105560	https://asia.ensembl.org/Homo_sapiens/Location/View?r=1:39105549-39105560;db=core	1
(GGC)3	39409304	39409312	https://asia.ensembl.org/Homo_sapiens/Location/View?r=1:39409304-39409312;db=core	1
(GCC)3	39491506	39491514	https://asia.ensembl.org/Homo_sapiens/Location/View?r=1:39491506-39491514;db=core	1
(GGC)3	39491944	39491952	https://asia.ensembl.org/Homo_sapiens/Location/View?r=1:39491944-39491952;db=core	1
(GGC)3	39672069	39672077	https://asia.ensembl.org/Homo_sapiens/Location/View?r=1:39672069-39672077;db=core	1
(GCC)3	39692253	39692261	https://asia.ensembl.org/Homo_sapiens/Location/View?r=1:39692253-39692261;db=core	1
(GGC)3	39968708	39968716	https://asia.ensembl.org/Homo_sapiens/Location/View?r=1:39968708-39968716;db=core	1
(ggc)3	40315942	40315950	https://asia.ensembl.org/Homo_sapiens/Location/View?r=1:40315942-40315950;db=core	1
(GGC)3	40807426	40807434	https://asia.ensembl.org/Homo_sapiens/Location/View?r=1:40807426-40807434;db=core	1
(GCC)3	40861456	40861464	https://asia.ensembl.org/Homo_sapiens/Location/View?r=1:40861456-40861464;db=core	1
(GGC)3	40861753	40861761	https://asia.ensembl.org/Homo_sapiens/Location/View?r=1:40861753-40861761;db=core	1
(GGC)4	40861960	40861971	https://asia.ensembl.org/Homo_sapiens/Location/View?r=1:40861960-40861971;db=core	1
(GCC)4	40884384	40884395	https://asia.ensembl.org/Homo_sapiens/Location/View?r=1:40884384-40884395;db=core	1
(GGC)4	41361512	41361523	https://asia.ensembl.org/Homo_sapiens/Location/View?r=1:41361512-41361523;db=core	1
(GCC)3	41361714	41361722	https://asia.ensembl.org/Homo_sapiens/Location/View?r=1:41361714-41361722;db=core	1
(GCC)3	41382261	41382269	https://asia.ensembl.org/Homo_sapiens/Location/View?r=1:41382261-41382269;db=core	1
(GCC)4	41382459	41382470	https://asia.ensembl.org/Homo_sapiens/Location/View?r=1:41382459-41382470;db=core	1
(GGC)3	41496308	41496316	https://asia.ensembl.org/Homo_sapiens/Location/View?r=1:41496308-41496316;db=core	1
(GGC)3	41496361	41496369	https://asia.ensembl.org/Homo_sapiens/Location/View?r=1:41496361-41496369;db=core	1
(GCC)3	42380491	42380499	https://asia.ensembl.org/Homo_sapiens/Location/View?r=1:42380491-42380499;db=core	1
(GGC)3	42766662	42766670	https://asia.ensembl.org/Homo_sapiens/Location/View?r=1:42766662-42766670;db=core	1
(GCC)3	43273124	43273132	https://asia.ensembl.org/Homo_sapiens/Location/View?r=1:43273124-43273132;db=core	1
(GGC)3	43530894	43530902	https://asia.ensembl.org/Homo_sapiens/Location/View?r=1:43530894-43530902;db=core	1
(GGC)4	43531009	43531020	https://asia.ensembl.org/Homo_sapiens/Location/View?r=1:43531009-43531020;db=core	1
(GGC)3	43558665	43558673	https://asia.ensembl.org/Homo_sapiens/Location/View?r=1:43558665-43558673;db=core	1
(gcc)3	43936341	43936349	https://asia.ensembl.org/Homo_sapiens/Location/View?r=1:43936341-43936349;db=core	1
(GGC)3	43974868	43974876	https://asia.ensembl.org/Homo_sapiens/Location/View?r=1:43974868-43974876;db=core	1
(GGC)3	43979240	43979248	https://asia.ensembl.org/Homo_sapiens/Location/View?r=1:43979240-43979248;db=core	1
(GGC)3	44030296	44030304	https://asia.ensembl.org/Homo_sapiens/Location/View?r=1:44030296-44030304;db=core	1
(ggc)3	44355119	44355127	https://asia.ensembl.org/Homo_sapiens/Location/View?r=1:44355119-44355127;db=core	1
(gcc)6	44405400	44405417	https://asia.ensembl.org/Homo_sapiens/Location/View?r=1:44405400-44405417;db=core	1
(GCC)3	44524247	44524255	https://asia.ensembl.org/Homo_sapiens/Location/View?r=1:44524247-44524255;db=core	1
(GGC)3	44559528	44559536	https://asia.ensembl.org/Homo_sapiens/Location/View?r=1:44559528-44559536;db=core	1
(GCC)4	44631979	44631990	https://asia.ensembl.org/Homo_sapiens/Location/View?r=1:44631979-44631990;db=core	1
(GCC)4	44632006	44632017	https://asia.ensembl.org/Homo_sapiens/Location/View?r=1:44632006-44632017;db=core	1
(GGC)3	44724700	44724708	https://asia.ensembl.org/Homo_sapiens/Location/View?r=1:44724700-44724708;db=core	1
(gcc)3	44738775	44738783	https://asia.ensembl.org/Homo_sapiens/Location/View?r=1:44738775-44738783;db=core	1
(GGC)4	45206375	45206386	https://asia.ensembl.org/Homo_sapiens/Location/View?r=1:45206375-45206386;db=core	1
(GCC)3	45303779	45303787	https://asia.ensembl.org/Homo_sapiens/Location/View?r=1:45303779-45303787;db=core	1
(GCC)3	45499947	45499955	https://asia.ensembl.org/Homo_sapiens/Location/View?r=1:45499947-45499955;db=core	1
(gcc)4	45803927	45803938	https://asia.ensembl.org/Homo_sapiens/Location/View?r=1:45803927-45803938;db=core	1
(ggc)7	46198518	46198538	https://asia.ensembl.org/Homo_sapiens/Location/View?r=1:46198518-46198538;db=core	1
(gcc)4	46240362	46240373	https://asia.ensembl.org/Homo_sapiens/Location/View?r=1:46240362-46240373;db=core	1
(GGC)3	46394416	46394424	https://asia.ensembl.org/Homo_sapiens/Location/View?r=1:46394416-46394424;db=core	1
(GCC)3	46474647	46474655	https://asia.ensembl.org/Homo_sapiens/Location/View?r=1:46474647-46474655;db=core	1
(GCC)3	46485806	46485814	https://asia.ensembl.org/Homo_sapiens/Location/View?r=1:46485806-46485814;db=core	1
(GCC)3	47225352	47225360	https://asia.ensembl.org/Homo_sapiens/Location/View?r=1:47225352-47225360;db=core	1
(gcc)3	47231309	47231317	https://asia.ensembl.org/Homo_sapiens/Location/View?r=1:47231309-47231317;db=core	1
(ggc)3	47231973	47231981	https://asia.ensembl.org/Homo_sapiens/Location/View?r=1:47231973-47231981;db=core	1
(gcc)3	47416392	47416400	https://asia.ensembl.org/Homo_sapiens/Location/View?r=1:47416392-47416400;db=core	1
(ggc)3	47416443	47416451	https://asia.ensembl.org/Homo_sapiens/Location/View?r=1:47416443-47416451;db=core	1
(ggc)6	47416493	47416510	https://asia.ensembl.org/Homo_sapiens/Location/View?r=1:47416493-47416510;db=core	1
(GCC)3	47416580	47416588	https://asia.ensembl.org/Homo_sapiens/Location/View?r=1:47416580-47416588;db=core	1
(GCC)3	47416917	47416925	https://asia.ensembl.org/Homo_sapiens/Location/View?r=1:47416917-47416925;db=core	1
(gcc)3	47417077	47417085	https://asia.ensembl.org/Homo_sapiens/Location/View?r=1:47417077-47417085;db=core	1
(GGC)3	47437566	47437574	https://asia.ensembl.org/Homo_sapiens/Location/View?r=1:47437566-47437574;db=core	1
(ggc)5	47438111	47438125	https://asia.ensembl.org/Homo_sapiens/Location/View?r=1:47438111-47438125;db=core	1
(GGC)3	47438225	47438233	https://asia.ensembl.org/Homo_sapiens/Location/View?r=1:47438225-47438233;db=core	1
(gcc)3	47438818	47438826	https://asia.ensembl.org/Homo_sapiens/Location/View?r=1:47438818-47438826;db=core	1
(gcc)3	47439035	47439043	https://asia.ensembl.org/Homo_sapiens/Location/View?r=1:47439035-47439043;db=core	1
(GCC)3	48399421	48399429	https://asia.ensembl.org/Homo_sapiens/Location/View?r=1:48399421-48399429;db=core	1
(ggc)3	48472103	48472111	https://asia.ensembl.org/Homo_sapiens/Location/View?r=1:48472103-48472111;db=core	1
(GGC)3	50048028	50048036	https://asia.ensembl.org/Homo_sapiens/Location/View?r=1:50048028-50048036;db=core	1
(GCC)3	50418706	50418714	https://asia.ensembl.org/Homo_sapiens/Location/View?r=1:50418706-50418714;db=core	1
(GGC)3	50421104	50421112	https://asia.ensembl.org/Homo_sapiens/Location/View?r=1:50421104-50421112;db=core	1
(gcc)4	50421480	50421491	https://asia.ensembl.org/Homo_sapiens/Location/View?r=1:50421480-50421491;db=core	1
(gcc)3	50960245	50960253	https://asia.ensembl.org/Homo_sapiens/Location/View?r=1:50960245-50960253;db=core	1
(GCC)4	51236447	51236458	https://asia.ensembl.org/Homo_sapiens/Location/View?r=1:51236447-51236458;db=core	1
(GCC)4	51236860	51236871	https://asia.ensembl.org/Homo_sapiens/Location/View?r=1:51236860-51236871;db=core	1
(GCC)3	51316317	51316325	https://asia.ensembl.org/Homo_sapiens/Location/View?r=1:51316317-51316325;db=core	1
(gcc)3	52553007	52553015	https://asia.ensembl.org/Homo_sapiens/Location/View?r=1:52553007-52553015;db=core	1
(ggc)3	52870455	52870463	https://asia.ensembl.org/Homo_sapiens/Location/View?r=1:52870455-52870463;db=core	1
(gcc)3	53328193	53328201	https://asia.ensembl.org/Homo_sapiens/Location/View?r=1:53328193-53328201;db=core	1
(GCC)3	53439294	53439302	https://asia.ensembl.org/Homo_sapiens/Location/View?r=1:53439294-53439302;db=core	1
(gcc)3	53459696	53459704	https://asia.ensembl.org/Homo_sapiens/Location/View?r=1:53459696-53459704;db=core	1
(gcc)6	53464677	53464694	https://asia.ensembl.org/Homo_sapiens/Location/View?r=1:53464677-53464694;db=core	1
(GCC)3	53737932	53737940	https://asia.ensembl.org/Homo_sapiens/Location/View?r=1:53737932-53737940;db=core	1
(GCC)3	53738793	53738801	https://asia.ensembl.org/Homo_sapiens/Location/View?r=1:53738793-53738801;db=core	1
(gcc)6	53739183	53739200	https://asia.ensembl.org/Homo_sapiens/Location/View?r=1:53739183-53739200;db=core	1
(GGC)3	53739378	53739386	https://asia.ensembl.org/Homo_sapiens/Location/View?r=1:53739378-53739386;db=core	1
(GCC)3	54014353	54014361	https://asia.ensembl.org/Homo_sapiens/Location/View?r=1:54014353-54014361;db=core	1
(GCC)3	54273412	54273420	https://asia.ensembl.org/Homo_sapiens/Location/View?r=1:54273412-54273420;db=core	1
(GCC)3	54315313	54315321	https://asia.ensembl.org/Homo_sapiens/Location/View?r=1:54315313-54315321;db=core	1
(GCC)3	54390781	54390789	https://asia.ensembl.org/Homo_sapiens/Location/View?r=1:54390781-54390789;db=core	1
(gcc)8	54406362	54406385	https://asia.ensembl.org/Homo_sapiens/Location/View?r=1:54406362-54406385;db=core	1
(GCC)3	54488435	54488443	https://asia.ensembl.org/Homo_sapiens/Location/View?r=1:54488435-54488443;db=core	1
(GCC)3	54489582	54489590	https://asia.ensembl.org/Homo_sapiens/Location/View?r=1:54489582-54489590;db=core	1
(GGC)3	54499388	54499396	https://asia.ensembl.org/Homo_sapiens/Location/View?r=1:54499388-54499396;db=core	1
(GCC)5	55214867	55214881	https://asia.ensembl.org/Homo_sapiens/Location/View?r=1:55214867-55214881;db=core	1
(GGC)3	55215461	55215469	https://asia.ensembl.org/Homo_sapiens/Location/View?r=1:55215461-55215469;db=core	1
(ggc)3	55933189	55933197	https://asia.ensembl.org/Homo_sapiens/Location/View?r=1:55933189-55933197;db=core	1
(GCC)3	56477684	56477692	https://asia.ensembl.org/Homo_sapiens/Location/View?r=1:56477684-56477692;db=core	1
(ggc)6	56645325	56645342	https://asia.ensembl.org/Homo_sapiens/Location/View?r=1:56645325-56645342;db=core	1
(GCC)4	57424207	57424218	https://asia.ensembl.org/Homo_sapiens/Location/View?r=1:57424207-57424218;db=core	1
(GCC)3	58249910	58249918	https://asia.ensembl.org/Homo_sapiens/Location/View?r=1:58249910-58249918;db=core	1
(GGC)3	58814624	58814632	https://asia.ensembl.org/Homo_sapiens/Location/View?r=1:58814624-58814632;db=core	1
(GCC)3	58929880	58929888	https://asia.ensembl.org/Homo_sapiens/Location/View?r=1:58929880-58929888;db=core	1
(GCC)3	59815131	59815139	https://asia.ensembl.org/Homo_sapiens/Location/View?r=1:59815131-59815139;db=core	1
(GCC)3	61051088	61051096	https://asia.ensembl.org/Homo_sapiens/Location/View?r=1:61051088-61051096;db=core	1
(ggc)3	61082398	61082406	https://asia.ensembl.org/Homo_sapiens/Location/View?r=1:61082398-61082406;db=core	1
(GCC)3	61459543	61459551	https://asia.ensembl.org/Homo_sapiens/Location/View?r=1:61459543-61459551;db=core	1
(GCC)3	62198522	62198530	https://asia.ensembl.org/Homo_sapiens/Location/View?r=1:62198522-62198530;db=core	1
(GCC)3	62437561	62437569	https://asia.ensembl.org/Homo_sapiens/Location/View?r=1:62437561-62437569;db=core	1
(GGC)5	62688189	62688203	https://asia.ensembl.org/Homo_sapiens/Location/View?r=1:62688189-62688203;db=core	1
(GGC)3	63000724	63000732	https://asia.ensembl.org/Homo_sapiens/Location/View?r=1:63000724-63000732;db=core	1
(GGC)4	63323840	63323851	https://asia.ensembl.org/Homo_sapiens/Location/View?r=1:63323840-63323851;db=core	1
(gcc)3	63324444	63324452	https://asia.ensembl.org/Homo_sapiens/Location/View?r=1:63324444-63324452;db=core	1
(GCC)3	63594152	63594160	https://asia.ensembl.org/Homo_sapiens/Location/View?r=1:63594152-63594160;db=core	1
(GCC)6	63774384	63774401	https://asia.ensembl.org/Homo_sapiens/Location/View?r=1:63774384-63774401;db=core	1
(ggc)4	64745174	64745185	https://asia.ensembl.org/Homo_sapiens/Location/View?r=1:64745174-64745185;db=core	1
(GCC)3	65067583	65067591	https://asia.ensembl.org/Homo_sapiens/Location/View?r=1:65067583-65067591;db=core	1
(GGC)3	65309560	65309568	https://asia.ensembl.org/Homo_sapiens/Location/View?r=1:65309560-65309568;db=core	1
(GGC)3	65688424	65688432	https://asia.ensembl.org/Homo_sapiens/Location/View?r=1:65688424-65688432;db=core	1
(ggc)3	66925070	66925078	https://asia.ensembl.org/Homo_sapiens/Location/View?r=1:66925070-66925078;db=core	1
(gcc)3	66979876	66979884	https://asia.ensembl.org/Homo_sapiens/Location/View?r=1:66979876-66979884;db=core	1
(gcc)5	67053752	67053766	https://asia.ensembl.org/Homo_sapiens/Location/View?r=1:67053752-67053766;db=core	1
(gcc)4	67053788	67053799	https://asia.ensembl.org/Homo_sapiens/Location/View?r=1:67053788-67053799;db=core	1
(GCC)3	67054149	67054157	https://asia.ensembl.org/Homo_sapiens/Location/View?r=1:67054149-67054157;db=core	1
(GGC)4	67833478	67833489	https://asia.ensembl.org/Homo_sapiens/Location/View?r=1:67833478-67833489;db=core	1
(ggc)3	70221720	70221728	https://asia.ensembl.org/Homo_sapiens/Location/View?r=1:70221720-70221728;db=core	1
(ggc)3	71047644	71047652	https://asia.ensembl.org/Homo_sapiens/Location/View?r=1:71047644-71047652;db=core	1
(GCC)3	71047709	71047717	https://asia.ensembl.org/Homo_sapiens/Location/View?r=1:71047709-71047717;db=core	1
(GCC)4	74673657	74673668	https://asia.ensembl.org/Homo_sapiens/Location/View?r=1:74673657-74673668;db=core	1
(GGC)3	75616341	75616349	https://asia.ensembl.org/Homo_sapiens/Location/View?r=1:75616341-75616349;db=core	1
(GGC)4	76868277	76868288	https://asia.ensembl.org/Homo_sapiens/Location/View?r=1:76868277-76868288;db=core	1
(ggc)6	77683482	77683499	https://asia.ensembl.org/Homo_sapiens/Location/View?r=1:77683482-77683499;db=core	1
(GGC)4	81802015	81802026	https://asia.ensembl.org/Homo_sapiens/Location/View?r=1:81802015-81802026;db=core	1
(GCC)3	81802897	81802905	https://asia.ensembl.org/Homo_sapiens/Location/View?r=1:81802897-81802905;db=core	1
(ggc)3	82239974	82239982	https://asia.ensembl.org/Homo_sapiens/Location/View?r=1:82239974-82239982;db=core	1
(GGC)3	85048100	85048108	https://asia.ensembl.org/Homo_sapiens/Location/View?r=1:85048100-85048108;db=core	1
(ggc)4	85201680	85201691	https://asia.ensembl.org/Homo_sapiens/Location/View?r=1:85201680-85201691;db=core	1
(GGC)5	85465063	85465077	https://asia.ensembl.org/Homo_sapiens/Location/View?r=1:85465063-85465077;db=core	1
(gcc)5	85576954	85576968	https://asia.ensembl.org/Homo_sapiens/Location/View?r=1:85576954-85576968;db=core	1
(ggc)3	87328781	87328789	https://asia.ensembl.org/Homo_sapiens/Location/View?r=1:87328781-87328789;db=core	1
(GCC)3	87331522	87331530	https://asia.ensembl.org/Homo_sapiens/Location/View?r=1:87331522-87331530;db=core	1
(GCC)3	87684512	87684520	https://asia.ensembl.org/Homo_sapiens/Location/View?r=1:87684512-87684520;db=core	1
(GGC)3	88462642	88462650	https://asia.ensembl.org/Homo_sapiens/Location/View?r=1:88462642-88462650;db=core	1
(GCC)3	89821092	89821100	https://asia.ensembl.org/Homo_sapiens/Location/View?r=1:89821092-89821100;db=core	1
(GCC)3	89821212	89821220	https://asia.ensembl.org/Homo_sapiens/Location/View?r=1:89821212-89821220;db=core	1
(GGC)3	90707072	90707080	https://asia.ensembl.org/Homo_sapiens/Location/View?r=1:90707072-90707080;db=core	1
(GCC)4	90712477	90712488	https://asia.ensembl.org/Homo_sapiens/Location/View?r=1:90712477-90712488;db=core	1
(GGC)5	90716824	90716838	https://asia.ensembl.org/Homo_sapiens/Location/View?r=1:90716824-90716838;db=core	1
(ggc)4	90716905	90716916	https://asia.ensembl.org/Homo_sapiens/Location/View?r=1:90716905-90716916;db=core	1
(gcc)5	90717595	90717609	https://asia.ensembl.org/Homo_sapiens/Location/View?r=1:90717595-90717609;db=core	1
(ggc)3	90717653	90717661	https://asia.ensembl.org/Homo_sapiens/Location/View?r=1:90717653-90717661;db=core	1
(GCC)3	90893973	90893981	https://asia.ensembl.org/Homo_sapiens/Location/View?r=1:90893973-90893981;db=core	1
(GCC)3	91021720	91021728	https://asia.ensembl.org/Homo_sapiens/Location/View?r=1:91021720-91021728;db=core	1
(GCC)4	91021781	91021792	https://asia.ensembl.org/Homo_sapiens/Location/View?r=1:91021781-91021792;db=core	1
(ggc)3	91179422	91179430	https://asia.ensembl.org/Homo_sapiens/Location/View?r=1:91179422-91179430;db=core	1
(gcc)3	91310757	91310765	https://asia.ensembl.org/Homo_sapiens/Location/View?r=1:91310757-91310765;db=core	1
(GCC)3	92298948	92298956	https://asia.ensembl.org/Homo_sapiens/Location/View?r=1:92298948-92298956;db=core	1
(GCC)3	92480627	92480635	https://asia.ensembl.org/Homo_sapiens/Location/View?r=1:92480627-92480635;db=core	1
(GCC)4	92483774	92483785	https://asia.ensembl.org/Homo_sapiens/Location/View?r=1:92483774-92483785;db=core	1
(GCC)3	92485731	92485739	https://asia.ensembl.org/Homo_sapiens/Location/View?r=1:92485731-92485739;db=core	1
(ggc)5	92784633	92784647	https://asia.ensembl.org/Homo_sapiens/Location/View?r=1:92784633-92784647;db=core	1
(GGC)3	93346125	93346133	https://asia.ensembl.org/Homo_sapiens/Location/View?r=1:93346125-93346133;db=core	1
(ggc)3	93346162	93346170	https://asia.ensembl.org/Homo_sapiens/Location/View?r=1:93346162-93346170;db=core	1
(ggc)4	93346181	93346192	https://asia.ensembl.org/Homo_sapiens/Location/View?r=1:93346181-93346192;db=core	1
(GGC)3	93577846	93577854	https://asia.ensembl.org/Homo_sapiens/Location/View?r=1:93577846-93577854;db=core	1
(ggc)3	93909346	93909354	https://asia.ensembl.org/Homo_sapiens/Location/View?r=1:93909346-93909354;db=core	1
(GCC)3	94237465	94237473	https://asia.ensembl.org/Homo_sapiens/Location/View?r=1:94237465-94237473;db=core	1
(GCC)3	94247615	94247623	https://asia.ensembl.org/Homo_sapiens/Location/View?r=1:94247615-94247623;db=core	1
(GCC)3	94247728	94247736	https://asia.ensembl.org/Homo_sapiens/Location/View?r=1:94247728-94247736;db=core	1
(gcc)7	94418421	94418441	https://asia.ensembl.org/Homo_sapiens/Location/View?r=1:94418421-94418441;db=core	1
(GGC)4	94820406	94820417	https://asia.ensembl.org/Homo_sapiens/Location/View?r=1:94820406-94820417;db=core	1
(gcc)3	95117577	95117585	https://asia.ensembl.org/Homo_sapiens/Location/View?r=1:95117577-95117585;db=core	1
(GGC)3	95234176	95234184	https://asia.ensembl.org/Homo_sapiens/Location/View?r=1:95234176-95234184;db=core	1
(gcc)5	98046224	98046238	https://asia.ensembl.org/Homo_sapiens/Location/View?r=1:98046224-98046238;db=core	1
(ggc)3	98661691	98661699	https://asia.ensembl.org/Homo_sapiens/Location/View?r=1:98661691-98661699;db=core	1
(GGC)4	98661916	98661927	https://asia.ensembl.org/Homo_sapiens/Location/View?r=1:98661916-98661927;db=core	1
(GCC)3	101239678	101239686	https://asia.ensembl.org/Homo_sapiens/Location/View?r=1:101239678-101239686;db=core	1
(ggc)3	101996935	101996943	https://asia.ensembl.org/Homo_sapiens/Location/View?r=1:101996935-101996943;db=core	1
(gcc)3	106747917	106747925	https://asia.ensembl.org/Homo_sapiens/Location/View?r=1:106747917-106747925;db=core	1
(GGC)3	107141244	107141252	https://asia.ensembl.org/Homo_sapiens/Location/View?r=1:107141244-107141252;db=core	1
(GCC)3	107141363	107141371	https://asia.ensembl.org/Homo_sapiens/Location/View?r=1:107141363-107141371;db=core	1
(GCC)3	107141399	107141407	https://asia.ensembl.org/Homo_sapiens/Location/View?r=1:107141399-107141407;db=core	1
(gcc)6	107964919	107964936	https://asia.ensembl.org/Homo_sapiens/Location/View?r=1:107964919-107964936;db=core	1
(GCC)3	108199872	108199880	https://asia.ensembl.org/Homo_sapiens/Location/View?r=1:108199872-108199880;db=core	1
(ggc)7	108560122	108560142	https://asia.ensembl.org/Homo_sapiens/Location/View?r=1:108560122-108560142;db=core	1
(GGC)3	108560262	108560270	https://asia.ensembl.org/Homo_sapiens/Location/View?r=1:108560262-108560270;db=core	1
(GGC)3	108560378	108560386	https://asia.ensembl.org/Homo_sapiens/Location/View?r=1:108560378-108560386;db=core	1
(GCC)3	108963432	108963440	https://asia.ensembl.org/Homo_sapiens/Location/View?r=1:108963432-108963440;db=core	1
(GGC)3	109100476	109100484	https://asia.ensembl.org/Homo_sapiens/Location/View?r=1:109100476-109100484;db=core	1
(GCC)3	109249521	109249529	https://asia.ensembl.org/Homo_sapiens/Location/View?r=1:109249521-109249529;db=core	1
(GCC)4	109250034	109250045	https://asia.ensembl.org/Homo_sapiens/Location/View?r=1:109250034-109250045;db=core	1
(gcc)4	109250114	109250125	https://asia.ensembl.org/Homo_sapiens/Location/View?r=1:109250114-109250125;db=core	1
(GGC)4	109397764	109397775	https://asia.ensembl.org/Homo_sapiens/Location/View?r=1:109397764-109397775;db=core	1
(GGC)3	109467086	109467094	https://asia.ensembl.org/Homo_sapiens/Location/View?r=1:109467086-109467094;db=core	1
(GGC)3	110069323	110069331	https://asia.ensembl.org/Homo_sapiens/Location/View?r=1:110069323-110069331;db=core	1
(GGC)3	110083958	110083966	https://asia.ensembl.org/Homo_sapiens/Location/View?r=1:110083958-110083966;db=core	1
(GCC)3	110210587	110210595	https://asia.ensembl.org/Homo_sapiens/Location/View?r=1:110210587-110210595;db=core	1
(GCC)5	110210906	110210920	https://asia.ensembl.org/Homo_sapiens/Location/View?r=1:110210906-110210920;db=core	1
(ggc)3	110607319	110607327	https://asia.ensembl.org/Homo_sapiens/Location/View?r=1:110607319-110607327;db=core	1
(gcc)3	110607393	110607401	https://asia.ensembl.org/Homo_sapiens/Location/View?r=1:110607393-110607401;db=core	1
(gcc)4	110674563	110674574	https://asia.ensembl.org/Homo_sapiens/Location/View?r=1:110674563-110674574;db=core	1
(ggc)4	110674768	110674779	https://asia.ensembl.org/Homo_sapiens/Location/View?r=1:110674768-110674779;db=core	1
(GGC)3	111204331	111204339	https://asia.ensembl.org/Homo_sapiens/Location/View?r=1:111204331-111204339;db=core	1
(gcc)3	111619809	111619817	https://asia.ensembl.org/Homo_sapiens/Location/View?r=1:111619809-111619817;db=core	1
(GGC)3	111620072	111620080	https://asia.ensembl.org/Homo_sapiens/Location/View?r=1:111620072-111620080;db=core	1
(GCC)3	111620126	111620134	https://asia.ensembl.org/Homo_sapiens/Location/View?r=1:111620126-111620134;db=core	1
(GGC)3	111755926	111755934	https://asia.ensembl.org/Homo_sapiens/Location/View?r=1:111755926-111755934;db=core	1
(GGC)4	111756282	111756293	https://asia.ensembl.org/Homo_sapiens/Location/View?r=1:111756282-111756293;db=core	1
(gcc)3	111989734	111989742	https://asia.ensembl.org/Homo_sapiens/Location/View?r=1:111989734-111989742;db=core	1
(gcc)3	111989746	111989754	https://asia.ensembl.org/Homo_sapiens/Location/View?r=1:111989746-111989754;db=core	1
(gcc)4	111989758	111989769	https://asia.ensembl.org/Homo_sapiens/Location/View?r=1:111989758-111989769;db=core	1
(GGC)3	111990998	111991006	https://asia.ensembl.org/Homo_sapiens/Location/View?r=1:111990998-111991006;db=core	1
(GCC)3	112674900	112674908	https://asia.ensembl.org/Homo_sapiens/Location/View?r=1:112674900-112674908;db=core	1
(GGC)3	112715000	112715008	https://asia.ensembl.org/Homo_sapiens/Location/View?r=1:112715000-112715008;db=core	1
(ggc)3	112718918	112718926	https://asia.ensembl.org/Homo_sapiens/Location/View?r=1:112718918-112718926;db=core	1
(gcc)3	112728797	112728805	https://asia.ensembl.org/Homo_sapiens/Location/View?r=1:112728797-112728805;db=core	1
(GCC)3	112956274	112956282	https://asia.ensembl.org/Homo_sapiens/Location/View?r=1:112956274-112956282;db=core	1
(GGC)3	113759425	113759433	https://asia.ensembl.org/Homo_sapiens/Location/View?r=1:113759425-113759433;db=core	1
(ggc)6	113929711	113929728	https://asia.ensembl.org/Homo_sapiens/Location/View?r=1:113929711-113929728;db=core	1
(gcc)3	114242544	114242552	https://asia.ensembl.org/Homo_sapiens/Location/View?r=1:114242544-114242552;db=core	1
(gcc)3	114479880	114479888	https://asia.ensembl.org/Homo_sapiens/Location/View?r=1:114479880-114479888;db=core	1
(gcc)3	115564409	115564417	https://asia.ensembl.org/Homo_sapiens/Location/View?r=1:115564409-115564417;db=core	1
(GGC)3	115828713	115828721	https://asia.ensembl.org/Homo_sapiens/Location/View?r=1:115828713-115828721;db=core	1
(GGC)3	116373318	116373326	https://asia.ensembl.org/Homo_sapiens/Location/View?r=1:116373318-116373326;db=core	1
(GGC)3	116667808	116667816	https://asia.ensembl.org/Homo_sapiens/Location/View?r=1:116667808-116667816;db=core	1
(GCC)3	116910675	116910683	https://asia.ensembl.org/Homo_sapiens/Location/View?r=1:116910675-116910683;db=core	1
(ggc)3	117300785	117300793	https://asia.ensembl.org/Homo_sapiens/Location/View?r=1:117300785-117300793;db=core	1
(GGC)3	117366782	117366790	https://asia.ensembl.org/Homo_sapiens/Location/View?r=1:117366782-117366790;db=core	1
(GCC)3	117367025	117367033	https://asia.ensembl.org/Homo_sapiens/Location/View?r=1:117367025-117367033;db=core	1
(GGC)3	117606033	117606041	https://asia.ensembl.org/Homo_sapiens/Location/View?r=1:117606033-117606041;db=core	1
(GCC)3	119001362	119001370	https://asia.ensembl.org/Homo_sapiens/Location/View?r=1:119001362-119001370;db=core	1
(GGC)3	119623682	119623690	https://asia.ensembl.org/Homo_sapiens/Location/View?r=1:119623682-119623690;db=core	1
(gcc)3	120069597	120069605	https://asia.ensembl.org/Homo_sapiens/Location/View?r=1:120069597-120069605;db=core	1
(gcc)3	120069609	120069617	https://asia.ensembl.org/Homo_sapiens/Location/View?r=1:120069609-120069617;db=core	1
(GCC)3	120341318	120341326	https://asia.ensembl.org/Homo_sapiens/Location/View?r=1:120341318-120341326;db=core	1
(GGC)3	120342270	120342278	https://asia.ensembl.org/Homo_sapiens/Location/View?r=1:120342270-120342278;db=core	1
(ggc)6	120558174	120558191	https://asia.ensembl.org/Homo_sapiens/Location/View?r=1:120558174-120558191;db=core	1
(ggc)3	120723968	120723976	https://asia.ensembl.org/Homo_sapiens/Location/View?r=1:120723968-120723976;db=core	1
(ggc)7	120724128	120724148	https://asia.ensembl.org/Homo_sapiens/Location/View?r=1:120724128-120724148;db=core	1
(GCC)3	120912872	120912880	https://asia.ensembl.org/Homo_sapiens/Location/View?r=1:120912872-120912880;db=core	1
(ggc)3	120983418	120983426	https://asia.ensembl.org/Homo_sapiens/Location/View?r=1:120983418-120983426;db=core	1
(GGC)4	121097872	121097883	https://asia.ensembl.org/Homo_sapiens/Location/View?r=1:121097872-121097883;db=core	1
(GCC)3	125118984	125118992	https://asia.ensembl.org/Homo_sapiens/Location/View?r=1:125118984-125118992;db=core	1
(ggc)3	143766527	143766535	https://asia.ensembl.org/Homo_sapiens/Location/View?r=1:143766527-143766535;db=core	1
(GGC)4	143885293	143885304	https://asia.ensembl.org/Homo_sapiens/Location/View?r=1:143885293-143885304;db=core	1
(GCC)3	145215240	145215248	https://asia.ensembl.org/Homo_sapiens/Location/View?r=1:145215240-145215248;db=core	1
(GGC)3	145216207	145216215	https://asia.ensembl.org/Homo_sapiens/Location/View?r=1:145216207-145216215;db=core	1
(GCC)4	145454647	145454658	https://asia.ensembl.org/Homo_sapiens/Location/View?r=1:145454647-145454658;db=core	1
(GCC)3	145487279	145487287	https://asia.ensembl.org/Homo_sapiens/Location/View?r=1:145487279-145487287;db=core	1
(gcc)3	145760587	145760595	https://asia.ensembl.org/Homo_sapiens/Location/View?r=1:145760587-145760595;db=core	1
(gcc)5	145823953	145823967	https://asia.ensembl.org/Homo_sapiens/Location/View?r=1:145823953-145823967;db=core	1
(gcc)3	146228971	146228979	https://asia.ensembl.org/Homo_sapiens/Location/View?r=1:146228971-146228979;db=core	1
(gcc)3	146228983	146228991	https://asia.ensembl.org/Homo_sapiens/Location/View?r=1:146228983-146228991;db=core	1
(ggc)3	146298105	146298113	https://asia.ensembl.org/Homo_sapiens/Location/View?r=1:146298105-146298113;db=core	1
(gcc)6	147172642	147172659	https://asia.ensembl.org/Homo_sapiens/Location/View?r=1:147172642-147172659;db=core	1
(gcc)3	147600205	147600213	https://asia.ensembl.org/Homo_sapiens/Location/View?r=1:147600205-147600213;db=core	1
(GCC)3	148060411	148060419	https://asia.ensembl.org/Homo_sapiens/Location/View?r=1:148060411-148060419;db=core	1
(GCC)3	148459203	148459211	https://asia.ensembl.org/Homo_sapiens/Location/View?r=1:148459203-148459211;db=core	1
(GGC)3	148460173	148460181	https://asia.ensembl.org/Homo_sapiens/Location/View?r=1:148460173-148460181;db=core	1
(GCC)3	148679716	148679724	https://asia.ensembl.org/Homo_sapiens/Location/View?r=1:148679716-148679724;db=core	1
(ggc)3	148748888	148748896	https://asia.ensembl.org/Homo_sapiens/Location/View?r=1:148748888-148748896;db=core	1
(gcc)6	148952731	148952748	https://asia.ensembl.org/Homo_sapiens/Location/View?r=1:148952731-148952748;db=core	1
(GCC)3	149175669	149175677	https://asia.ensembl.org/Homo_sapiens/Location/View?r=1:149175669-149175677;db=core	1
(ggc)3	149390630	149390638	https://asia.ensembl.org/Homo_sapiens/Location/View?r=1:149390630-149390638;db=core	1
(ggc)3	149390642	149390650	https://asia.ensembl.org/Homo_sapiens/Location/View?r=1:149390642-149390650;db=core	1
(ggc)9	149390802	149390828	https://asia.ensembl.org/Homo_sapiens/Location/View?r=1:149390802-149390828;db=core	1
(GCC)3	149606967	149606975	https://asia.ensembl.org/Homo_sapiens/Location/View?r=1:149606967-149606975;db=core	1
(ggc)3	149675188	149675196	https://asia.ensembl.org/Homo_sapiens/Location/View?r=1:149675188-149675196;db=core	1
(GGC)4	149793237	149793248	https://asia.ensembl.org/Homo_sapiens/Location/View?r=1:149793237-149793248;db=core	1
(GCC)3	150149710	150149718	https://asia.ensembl.org/Homo_sapiens/Location/View?r=1:150149710-150149718;db=core	1
(GCC)4	150150311	150150322	https://asia.ensembl.org/Homo_sapiens/Location/View?r=1:150150311-150150322;db=core	1
(ggc)3	150321489	150321497	https://asia.ensembl.org/Homo_sapiens/Location/View?r=1:150321489-150321497;db=core	1
(GGC)3	150579288	150579296	https://asia.ensembl.org/Homo_sapiens/Location/View?r=1:150579288-150579296;db=core	1
(gcc)3	150851258	150851266	https://asia.ensembl.org/Homo_sapiens/Location/View?r=1:150851258-150851266;db=core	1
(gcc)3	150876616	150876624	https://asia.ensembl.org/Homo_sapiens/Location/View?r=1:150876616-150876624;db=core	1
(GCC)3	151009003	151009011	https://asia.ensembl.org/Homo_sapiens/Location/View?r=1:151009003-151009011;db=core	1
(GCC)3	151059751	151059759	https://asia.ensembl.org/Homo_sapiens/Location/View?r=1:151059751-151059759;db=core	1
(gcc)3	151203055	151203063	https://asia.ensembl.org/Homo_sapiens/Location/View?r=1:151203055-151203063;db=core	1
(GCC)3	151594368	151594376	https://asia.ensembl.org/Homo_sapiens/Location/View?r=1:151594368-151594376;db=core	1
(ggc)4	151612258	151612269	https://asia.ensembl.org/Homo_sapiens/Location/View?r=1:151612258-151612269;db=core	1
(ggc)3	151612312	151612320	https://asia.ensembl.org/Homo_sapiens/Location/View?r=1:151612312-151612320;db=core	1
(GCC)4	151838218	151838229	https://asia.ensembl.org/Homo_sapiens/Location/View?r=1:151838218-151838229;db=core	1
(GGC)3	153261024	153261032	https://asia.ensembl.org/Homo_sapiens/Location/View?r=1:153261024-153261032;db=core	1
(GGC)3	153261129	153261137	https://asia.ensembl.org/Homo_sapiens/Location/View?r=1:153261129-153261137;db=core	1
(GGC)3	153261225	153261233	https://asia.ensembl.org/Homo_sapiens/Location/View?r=1:153261225-153261233;db=core	1
(GGC)3	153261300	153261308	https://asia.ensembl.org/Homo_sapiens/Location/View?r=1:153261300-153261308;db=core	1
(GGC)3	153261492	153261500	https://asia.ensembl.org/Homo_sapiens/Location/View?r=1:153261492-153261500;db=core	1
(GGC)3	153261519	153261527	https://asia.ensembl.org/Homo_sapiens/Location/View?r=1:153261519-153261527;db=core	1
(GGC)5	153261783	153261797	https://asia.ensembl.org/Homo_sapiens/Location/View?r=1:153261783-153261797;db=core	1
(GGC)3	153379794	153379802	https://asia.ensembl.org/Homo_sapiens/Location/View?r=1:153379794-153379802;db=core	1
(GGC)3	153379823	153379831	https://asia.ensembl.org/Homo_sapiens/Location/View?r=1:153379823-153379831;db=core	1
(GCC)3	153775974	153775982	https://asia.ensembl.org/Homo_sapiens/Location/View?r=1:153775974-153775982;db=core	1
(GGC)3	153922773	153922781	https://asia.ensembl.org/Homo_sapiens/Location/View?r=1:153922773-153922781;db=core	1
(ggc)6	154221000	154221017	https://asia.ensembl.org/Homo_sapiens/Location/View?r=1:154221000-154221017;db=core	1
(GGC)5	154328776	154328790	https://asia.ensembl.org/Homo_sapiens/Location/View?r=1:154328776-154328790;db=core	1
(GCC)4	154501837	154501848	https://asia.ensembl.org/Homo_sapiens/Location/View?r=1:154501837-154501848;db=core	1
(GGC)3	154502563	154502571	https://asia.ensembl.org/Homo_sapiens/Location/View?r=1:154502563-154502571;db=core	1
(GCC)3	154836771	154836779	https://asia.ensembl.org/Homo_sapiens/Location/View?r=1:154836771-154836779;db=core	1
(gcc)3	155017548	155017556	https://asia.ensembl.org/Homo_sapiens/Location/View?r=1:155017548-155017556;db=core	1
(GGC)3	155063061	155063069	https://asia.ensembl.org/Homo_sapiens/Location/View?r=1:155063061-155063069;db=core	1
(GGC)6	155078916	155078933	https://asia.ensembl.org/Homo_sapiens/Location/View?r=1:155078916-155078933;db=core	1
(GCC)3	155080844	155080852	https://asia.ensembl.org/Homo_sapiens/Location/View?r=1:155080844-155080852;db=core	1
(gcc)3	155208723	155208731	https://asia.ensembl.org/Homo_sapiens/Location/View?r=1:155208723-155208731;db=core	1
(GGC)3	155255210	155255218	https://asia.ensembl.org/Homo_sapiens/Location/View?r=1:155255210-155255218;db=core	1
(ggc)3	155562465	155562473	https://asia.ensembl.org/Homo_sapiens/Location/View?r=1:155562465-155562473;db=core	1
(gcc)6	155562878	155562895	https://asia.ensembl.org/Homo_sapiens/Location/View?r=1:155562878-155562895;db=core	1
(ggc)3	155688319	155688327	https://asia.ensembl.org/Homo_sapiens/Location/View?r=1:155688319-155688327;db=core	1
(GGC)3	155860286	155860294	https://asia.ensembl.org/Homo_sapiens/Location/View?r=1:155860286-155860294;db=core	1
(GGC)3	155942206	155942214	https://asia.ensembl.org/Homo_sapiens/Location/View?r=1:155942206-155942214;db=core	1
(gcc)4	156053701	156053712	https://asia.ensembl.org/Homo_sapiens/Location/View?r=1:156053701-156053712;db=core	1
(GGC)4	156081744	156081755	https://asia.ensembl.org/Homo_sapiens/Location/View?r=1:156081744-156081755;db=core	1
(gcc)4	156282767	156282778	https://asia.ensembl.org/Homo_sapiens/Location/View?r=1:156282767-156282778;db=core	1
(gcc)5	156420470	156420484	https://asia.ensembl.org/Homo_sapiens/Location/View?r=1:156420470-156420484;db=core	1
(GCC)3	156436339	156436347	https://asia.ensembl.org/Homo_sapiens/Location/View?r=1:156436339-156436347;db=core	1
(GGC)3	156750953	156750961	https://asia.ensembl.org/Homo_sapiens/Location/View?r=1:156750953-156750961;db=core	1
(GGC)3	156914034	156914042	https://asia.ensembl.org/Homo_sapiens/Location/View?r=1:156914034-156914042;db=core	1
(GCC)3	158177773	158177781	https://asia.ensembl.org/Homo_sapiens/Location/View?r=1:158177773-158177781;db=core	1
(GCC)3	158177833	158177841	https://asia.ensembl.org/Homo_sapiens/Location/View?r=1:158177833-158177841;db=core	1
(GGC)4	159854854	159854865	https://asia.ensembl.org/Homo_sapiens/Location/View?r=1:159854854-159854865;db=core	1
(GCC)3	159924589	159924597	https://asia.ensembl.org/Homo_sapiens/Location/View?r=1:159924589-159924597;db=core	1
(ggc)5	160205401	160205415	https://asia.ensembl.org/Homo_sapiens/Location/View?r=1:160205401-160205415;db=core	1
(GGC)3	160400460	160400468	https://asia.ensembl.org/Homo_sapiens/Location/View?r=1:160400460-160400468;db=core	1
(gcc)3	160933552	160933560	https://asia.ensembl.org/Homo_sapiens/Location/View?r=1:160933552-160933560;db=core	1
(GGC)3	161079720	161079728	https://asia.ensembl.org/Homo_sapiens/Location/View?r=1:161079720-161079728;db=core	1
(gcc)7	161132638	161132658	https://asia.ensembl.org/Homo_sapiens/Location/View?r=1:161132638-161132658;db=core	1
(GGC)3	161159525	161159533	https://asia.ensembl.org/Homo_sapiens/Location/View?r=1:161159525-161159533;db=core	1
(GGC)3	161194085	161194093	https://asia.ensembl.org/Homo_sapiens/Location/View?r=1:161194085-161194093;db=core	1
(GGC)3	161299579	161299587	https://asia.ensembl.org/Homo_sapiens/Location/View?r=1:161299579-161299587;db=core	1
(GGC)3	161440798	161440806	https://asia.ensembl.org/Homo_sapiens/Location/View?r=1:161440798-161440806;db=core	1
(GGC)3	161448216	161448224	https://asia.ensembl.org/Homo_sapiens/Location/View?r=1:161448216-161448224;db=core	1
(GGC)3	161455597	161455605	https://asia.ensembl.org/Homo_sapiens/Location/View?r=1:161455597-161455605;db=core	1
(GGC)3	161463007	161463015	https://asia.ensembl.org/Homo_sapiens/Location/View?r=1:161463007-161463015;db=core	1
(GGC)3	161470388	161470396	https://asia.ensembl.org/Homo_sapiens/Location/View?r=1:161470388-161470396;db=core	1
(GCC)3	161766305	161766313	https://asia.ensembl.org/Homo_sapiens/Location/View?r=1:161766305-161766313;db=core	1
(GGC)3	161890852	161890860	https://asia.ensembl.org/Homo_sapiens/Location/View?r=1:161890852-161890860;db=core	1
(GCC)3	162070138	162070146	https://asia.ensembl.org/Homo_sapiens/Location/View?r=1:162070138-162070146;db=core	1
(GGC)3	162367489	162367497	https://asia.ensembl.org/Homo_sapiens/Location/View?r=1:162367489-162367497;db=core	1
(GCC)3	163423153	163423161	https://asia.ensembl.org/Homo_sapiens/Location/View?r=1:163423153-163423161;db=core	1
(ggc)3	163499011	163499019	https://asia.ensembl.org/Homo_sapiens/Location/View?r=1:163499011-163499019;db=core	1
(GCC)3	164576719	164576727	https://asia.ensembl.org/Homo_sapiens/Location/View?r=1:164576719-164576727;db=core	1
(gcc)7	165445152	165445172	https://asia.ensembl.org/Homo_sapiens/Location/View?r=1:165445152-165445172;db=core	1
(GGC)3	165769048	165769056	https://asia.ensembl.org/Homo_sapiens/Location/View?r=1:165769048-165769056;db=core	1
(ggc)3	165827486	165827494	https://asia.ensembl.org/Homo_sapiens/Location/View?r=1:165827486-165827494;db=core	1
(ggc)3	166096905	166096913	https://asia.ensembl.org/Homo_sapiens/Location/View?r=1:166096905-166096913;db=core	1
(gcc)6	166166711	166166728	https://asia.ensembl.org/Homo_sapiens/Location/View?r=1:166166711-166166728;db=core	1
(GGC)4	166839623	166839634	https://asia.ensembl.org/Homo_sapiens/Location/View?r=1:166839623-166839634;db=core	1
(ggc)3	166839936	166839944	https://asia.ensembl.org/Homo_sapiens/Location/View?r=1:166839936-166839944;db=core	1
(GGC)3	166975353	166975361	https://asia.ensembl.org/Homo_sapiens/Location/View?r=1:166975353-166975361;db=core	1
(GGC)3	167126416	167126424	https://asia.ensembl.org/Homo_sapiens/Location/View?r=1:167126416-167126424;db=core	1
(GGC)3	167221461	167221469	https://asia.ensembl.org/Homo_sapiens/Location/View?r=1:167221461-167221469;db=core	1
(ggc)3	167722222	167722230	https://asia.ensembl.org/Homo_sapiens/Location/View?r=1:167722222-167722230;db=core	1
(GCC)3	167937202	167937210	https://asia.ensembl.org/Homo_sapiens/Location/View?r=1:167937202-167937210;db=core	1
(gcc)3	168837519	168837527	https://asia.ensembl.org/Homo_sapiens/Location/View?r=1:168837519-168837527;db=core	1
(gcc)6	169485719	169485736	https://asia.ensembl.org/Homo_sapiens/Location/View?r=1:169485719-169485736;db=core	1
(ggc)3	171693745	171693753	https://asia.ensembl.org/Homo_sapiens/Location/View?r=1:171693745-171693753;db=core	1
(ggc)3	171841151	171841159	https://asia.ensembl.org/Homo_sapiens/Location/View?r=1:171841151-171841159;db=core	1
(GCC)3	172443740	172443748	https://asia.ensembl.org/Homo_sapiens/Location/View?r=1:172443740-172443748;db=core	1
(gcc)3	173613667	173613675	https://asia.ensembl.org/Homo_sapiens/Location/View?r=1:173613667-173613675;db=core	1
(GGC)3	173824603	173824611	https://asia.ensembl.org/Homo_sapiens/Location/View?r=1:173824603-173824611;db=core	1
(GCC)5	174022161	174022175	https://asia.ensembl.org/Homo_sapiens/Location/View?r=1:174022161-174022175;db=core	1
(GCC)3	174022224	174022232	https://asia.ensembl.org/Homo_sapiens/Location/View?r=1:174022224-174022232;db=core	1
(GGC)3	174999976	174999984	https://asia.ensembl.org/Homo_sapiens/Location/View?r=1:174999976-174999984;db=core	1
(gcc)3	175829163	175829171	https://asia.ensembl.org/Homo_sapiens/Location/View?r=1:175829163-175829171;db=core	1
(gcc)4	176207211	176207222	https://asia.ensembl.org/Homo_sapiens/Location/View?r=1:176207211-176207222;db=core	1
(ggc)5	177171470	177171484	https://asia.ensembl.org/Homo_sapiens/Location/View?r=1:177171470-177171484;db=core	1
(gcc)7	178093773	178093793	https://asia.ensembl.org/Homo_sapiens/Location/View?r=1:178093773-178093793;db=core	1
(ggc)4	178094012	178094023	https://asia.ensembl.org/Homo_sapiens/Location/View?r=1:178094012-178094023;db=core	1
(GCC)3	178094457	178094465	https://asia.ensembl.org/Homo_sapiens/Location/View?r=1:178094457-178094465;db=core	1
(GGC)4	178725340	178725351	https://asia.ensembl.org/Homo_sapiens/Location/View?r=1:178725340-178725351;db=core	1
(ggc)4	178725504	178725515	https://asia.ensembl.org/Homo_sapiens/Location/View?r=1:178725504-178725515;db=core	1
(GGC)5	179025969	179025983	https://asia.ensembl.org/Homo_sapiens/Location/View?r=1:179025969-179025983;db=core	1
(GGC)3	179882357	179882365	https://asia.ensembl.org/Homo_sapiens/Location/View?r=1:179882357-179882365;db=core	1
(gcc)3	180154933	180154941	https://asia.ensembl.org/Homo_sapiens/Location/View?r=1:180154933-180154941;db=core	1
(GCC)4	180632146	180632157	https://asia.ensembl.org/Homo_sapiens/Location/View?r=1:180632146-180632157;db=core	1
(GGC)3	180912294	180912302	https://asia.ensembl.org/Homo_sapiens/Location/View?r=1:180912294-180912302;db=core	1
(GGC)4	180913257	180913268	https://asia.ensembl.org/Homo_sapiens/Location/View?r=1:180913257-180913268;db=core	1
(GGC)3	180953797	180953805	https://asia.ensembl.org/Homo_sapiens/Location/View?r=1:180953797-180953805;db=core	1
(GGC)3	181089348	181089356	https://asia.ensembl.org/Homo_sapiens/Location/View?r=1:181089348-181089356;db=core	1
(GGC)3	181089574	181089582	https://asia.ensembl.org/Homo_sapiens/Location/View?r=1:181089574-181089582;db=core	1
(GCC)3	181413240	181413248	https://asia.ensembl.org/Homo_sapiens/Location/View?r=1:181413240-181413248;db=core	1
(GGC)3	181482258	181482266	https://asia.ensembl.org/Homo_sapiens/Location/View?r=1:181482258-181482266;db=core	1
(gcc)3	181530206	181530214	https://asia.ensembl.org/Homo_sapiens/Location/View?r=1:181530206-181530214;db=core	1
(gcc)3	181954907	181954915	https://asia.ensembl.org/Homo_sapiens/Location/View?r=1:181954907-181954915;db=core	1
(gcc)3	182011179	182011187	https://asia.ensembl.org/Homo_sapiens/Location/View?r=1:182011179-182011187;db=core	1
(GCC)3	182029906	182029914	https://asia.ensembl.org/Homo_sapiens/Location/View?r=1:182029906-182029914;db=core	1
(GGC)3	182671944	182671952	https://asia.ensembl.org/Homo_sapiens/Location/View?r=1:182671944-182671952;db=core	1
(GGC)3	182789671	182789679	https://asia.ensembl.org/Homo_sapiens/Location/View?r=1:182789671-182789679;db=core	1
(GGC)5	182839552	182839566	https://asia.ensembl.org/Homo_sapiens/Location/View?r=1:182839552-182839566;db=core	1
(GCC)3	183023575	183023583	https://asia.ensembl.org/Homo_sapiens/Location/View?r=1:183023575-183023583;db=core	1
(GGC)3	183023787	183023795	https://asia.ensembl.org/Homo_sapiens/Location/View?r=1:183023787-183023795;db=core	1
(GGC)3	183472521	183472529	https://asia.ensembl.org/Homo_sapiens/Location/View?r=1:183472521-183472529;db=core	1
(GGC)3	183472967	183472975	https://asia.ensembl.org/Homo_sapiens/Location/View?r=1:183472967-183472975;db=core	1
(GGC)4	184037419	184037430	https://asia.ensembl.org/Homo_sapiens/Location/View?r=1:184037419-184037430;db=core	1
(GCC)3	184388052	184388060	https://asia.ensembl.org/Homo_sapiens/Location/View?r=1:184388052-184388060;db=core	1
(GGC)4	185316800	185316811	https://asia.ensembl.org/Homo_sapiens/Location/View?r=1:185316800-185316811;db=core	1
(gcc)3	185317300	185317308	https://asia.ensembl.org/Homo_sapiens/Location/View?r=1:185317300-185317308;db=core	1
(ggc)3	185734416	185734424	https://asia.ensembl.org/Homo_sapiens/Location/View?r=1:185734416-185734424;db=core	1
(GCC)3	186375116	186375124	https://asia.ensembl.org/Homo_sapiens/Location/View?r=1:186375116-186375124;db=core	1
(ggc)3	186730376	186730384	https://asia.ensembl.org/Homo_sapiens/Location/View?r=1:186730376-186730384;db=core	1
(gcc)3	187616053	187616061	https://asia.ensembl.org/Homo_sapiens/Location/View?r=1:187616053-187616061;db=core	1
(gcc)3	192808678	192808686	https://asia.ensembl.org/Homo_sapiens/Location/View?r=1:192808678-192808686;db=core	1
(GCC)3	197775383	197775391	https://asia.ensembl.org/Homo_sapiens/Location/View?r=1:197775383-197775391;db=core	1
(GCC)3	197912181	197912189	https://asia.ensembl.org/Homo_sapiens/Location/View?r=1:197912181-197912189;db=core	1
(GCC)3	200036504	200036512	https://asia.ensembl.org/Homo_sapiens/Location/View?r=1:200036504-200036512;db=core	1
(GCC)3	200148207	200148215	https://asia.ensembl.org/Homo_sapiens/Location/View?r=1:200148207-200148215;db=core	1
(gcc)7	200409603	200409623	https://asia.ensembl.org/Homo_sapiens/Location/View?r=1:200409603-200409623;db=core	1
(ggc)3	200669460	200669468	https://asia.ensembl.org/Homo_sapiens/Location/View?r=1:200669460-200669468;db=core	1
(GCC)3	200992343	200992351	https://asia.ensembl.org/Homo_sapiens/Location/View?r=1:200992343-200992351;db=core	1
(GGC)3	201023602	201023610	https://asia.ensembl.org/Homo_sapiens/Location/View?r=1:201023602-201023610;db=core	1
(GCC)3	201389241	201389249	https://asia.ensembl.org/Homo_sapiens/Location/View?r=1:201389241-201389249;db=core	1
(gcc)3	201399343	201399351	https://asia.ensembl.org/Homo_sapiens/Location/View?r=1:201399343-201399351;db=core	1
(GCC)3	201614347	201614355	https://asia.ensembl.org/Homo_sapiens/Location/View?r=1:201614347-201614355;db=core	1
(ggc)5	201829211	201829225	https://asia.ensembl.org/Homo_sapiens/Location/View?r=1:201829211-201829225;db=core	1
(GGC)3	202967397	202967405	https://asia.ensembl.org/Homo_sapiens/Location/View?r=1:202967397-202967405;db=core	1
(gcc)4	203127679	203127690	https://asia.ensembl.org/Homo_sapiens/Location/View?r=1:203127679-203127690;db=core	1
(GGC)3	204129197	204129205	https://asia.ensembl.org/Homo_sapiens/Location/View?r=1:204129197-204129205;db=core	1
(GCC)3	204151748	204151756	https://asia.ensembl.org/Homo_sapiens/Location/View?r=1:204151748-204151756;db=core	1
(gcc)3	205043246	205043254	https://asia.ensembl.org/Homo_sapiens/Location/View?r=1:205043246-205043254;db=core	1
(GCC)3	205344311	205344319	https://asia.ensembl.org/Homo_sapiens/Location/View?r=1:205344311-205344319;db=core	1
(GCC)3	205344782	205344790	https://asia.ensembl.org/Homo_sapiens/Location/View?r=1:205344782-205344790;db=core	1
(GGC)3	205455709	205455717	https://asia.ensembl.org/Homo_sapiens/Location/View?r=1:205455709-205455717;db=core	1
(ggc)3	205545131	205545139	https://asia.ensembl.org/Homo_sapiens/Location/View?r=1:205545131-205545139;db=core	1
(ggc)4	205631766	205631777	https://asia.ensembl.org/Homo_sapiens/Location/View?r=1:205631766-205631777;db=core	1
(GCC)3	205631957	205631965	https://asia.ensembl.org/Homo_sapiens/Location/View?r=1:205631957-205631965;db=core	1
(gcc)5	206685330	206685344	https://asia.ensembl.org/Homo_sapiens/Location/View?r=1:206685330-206685344;db=core	1
(GGC)3	206909545	206909553	https://asia.ensembl.org/Homo_sapiens/Location/View?r=1:206909545-206909553;db=core	1
(GCC)3	207659053	207659061	https://asia.ensembl.org/Homo_sapiens/Location/View?r=1:207659053-207659061;db=core	1
(GCC)3	208243692	208243700	https://asia.ensembl.org/Homo_sapiens/Location/View?r=1:208243692-208243700;db=core	1
(ggc)10	208244304	208244333	https://asia.ensembl.org/Homo_sapiens/Location/View?r=1:208244304-208244333;db=core	1
(ggc)3	209858917	209858925	https://asia.ensembl.org/Homo_sapiens/Location/View?r=1:209858917-209858925;db=core	1
(GCC)3	209938563	209938571	https://asia.ensembl.org/Homo_sapiens/Location/View?r=1:209938563-209938571;db=core	1
(GCC)3	210232985	210232993	https://asia.ensembl.org/Homo_sapiens/Location/View?r=1:210232985-210232993;db=core	1
(GGC)4	210233603	210233614	https://asia.ensembl.org/Homo_sapiens/Location/View?r=1:210233603-210233614;db=core	1
(GCC)3	210329000	210329008	https://asia.ensembl.org/Homo_sapiens/Location/View?r=1:210329000-210329008;db=core	1
(gcc)3	211197403	211197411	https://asia.ensembl.org/Homo_sapiens/Location/View?r=1:211197403-211197411;db=core	1
(GGC)3	211259321	211259329	https://asia.ensembl.org/Homo_sapiens/Location/View?r=1:211259321-211259329;db=core	1
(ggc)4	211259638	211259649	https://asia.ensembl.org/Homo_sapiens/Location/View?r=1:211259638-211259649;db=core	1
(GGC)3	211327041	211327049	https://asia.ensembl.org/Homo_sapiens/Location/View?r=1:211327041-211327049;db=core	1
(gcc)3	211416907	211416915	https://asia.ensembl.org/Homo_sapiens/Location/View?r=1:211416907-211416915;db=core	1
(GGC)3	211578904	211578912	https://asia.ensembl.org/Homo_sapiens/Location/View?r=1:211578904-211578912;db=core	1
(ggc)3	212432962	212432970	https://asia.ensembl.org/Homo_sapiens/Location/View?r=1:212432962-212432970;db=core	1
(GCC)3	212608805	212608813	https://asia.ensembl.org/Homo_sapiens/Location/View?r=1:212608805-212608813;db=core	1
(gcc)4	212951479	212951490	https://asia.ensembl.org/Homo_sapiens/Location/View?r=1:212951479-212951490;db=core	1
(gcc)3	212951494	212951502	https://asia.ensembl.org/Homo_sapiens/Location/View?r=1:212951494-212951502;db=core	1
(ggc)4	213051377	213051388	https://asia.ensembl.org/Homo_sapiens/Location/View?r=1:213051377-213051388;db=core	1
(GGC)3	213982782	213982790	https://asia.ensembl.org/Homo_sapiens/Location/View?r=1:213982782-213982790;db=core	1
(GCC)3	214281129	214281137	https://asia.ensembl.org/Homo_sapiens/Location/View?r=1:214281129-214281137;db=core	1
(GGC)7	214281431	214281451	https://asia.ensembl.org/Homo_sapiens/Location/View?r=1:214281431-214281451;db=core	1
(GGC)3	214552178	214552186	https://asia.ensembl.org/Homo_sapiens/Location/View?r=1:214552178-214552186;db=core	1
(gcc)3	214576226	214576234	https://asia.ensembl.org/Homo_sapiens/Location/View?r=1:214576226-214576234;db=core	1
(ggc)4	214870546	214870557	https://asia.ensembl.org/Homo_sapiens/Location/View?r=1:214870546-214870557;db=core	1
(ggc)4	214870566	214870577	https://asia.ensembl.org/Homo_sapiens/Location/View?r=1:214870566-214870577;db=core	1
(ggc)9	215083003	215083029	https://asia.ensembl.org/Homo_sapiens/Location/View?r=1:215083003-215083029;db=core	1
(GGC)3	215083099	215083107	https://asia.ensembl.org/Homo_sapiens/Location/View?r=1:215083099-215083107;db=core	1
(gcc)4	215567571	215567582	https://asia.ensembl.org/Homo_sapiens/Location/View?r=1:215567571-215567582;db=core	1
(GCC)3	217090162	217090170	https://asia.ensembl.org/Homo_sapiens/Location/View?r=1:217090162-217090170;db=core	1
(ggc)5	217135529	217135543	https://asia.ensembl.org/Homo_sapiens/Location/View?r=1:217135529-217135543;db=core	1
(ggc)5	217135550	217135564	https://asia.ensembl.org/Homo_sapiens/Location/View?r=1:217135550-217135564;db=core	1
(gcc)3	219307834	219307842	https://asia.ensembl.org/Homo_sapiens/Location/View?r=1:219307834-219307842;db=core	1
(gcc)3	220311699	220311707	https://asia.ensembl.org/Homo_sapiens/Location/View?r=1:220311699-220311707;db=core	1
(GGC)3	220690539	220690547	https://asia.ensembl.org/Homo_sapiens/Location/View?r=1:220690539-220690547;db=core	1
(GGC)3	220786477	220786485	https://asia.ensembl.org/Homo_sapiens/Location/View?r=1:220786477-220786485;db=core	1
(GCC)3	220786915	220786923	https://asia.ensembl.org/Homo_sapiens/Location/View?r=1:220786915-220786923;db=core	1
(GCC)3	220879762	220879770	https://asia.ensembl.org/Homo_sapiens/Location/View?r=1:220879762-220879770;db=core	1
(GCC)3	220880061	220880069	https://asia.ensembl.org/Homo_sapiens/Location/View?r=1:220880061-220880069;db=core	1
(ggc)4	220884518	220884529	https://asia.ensembl.org/Homo_sapiens/Location/View?r=1:220884518-220884529;db=core	1
(GGC)4	220884602	220884613	https://asia.ensembl.org/Homo_sapiens/Location/View?r=1:220884602-220884613;db=core	1
(GGC)3	222465417	222465425	https://asia.ensembl.org/Homo_sapiens/Location/View?r=1:222465417-222465425;db=core	1
(gcc)3	223114949	223114957	https://asia.ensembl.org/Homo_sapiens/Location/View?r=1:223114949-223114957;db=core	1
(ggc)4	223364323	223364334	https://asia.ensembl.org/Homo_sapiens/Location/View?r=1:223364323-223364334;db=core	1
(ggc)5	223845785	223845799	https://asia.ensembl.org/Homo_sapiens/Location/View?r=1:223845785-223845799;db=core	1
(GCC)3	223992830	223992838	https://asia.ensembl.org/Homo_sapiens/Location/View?r=1:223992830-223992838;db=core	1
(gcc)6	224183256	224183273	https://asia.ensembl.org/Homo_sapiens/Location/View?r=1:224183256-224183273;db=core	1
(GGC)3	224616150	224616158	https://asia.ensembl.org/Homo_sapiens/Location/View?r=1:224616150-224616158;db=core	1
(ggc)7	224616327	224616347	https://asia.ensembl.org/Homo_sapiens/Location/View?r=1:224616327-224616347;db=core	1
(gcc)3	225324099	225324107	https://asia.ensembl.org/Homo_sapiens/Location/View?r=1:225324099-225324107;db=core	1
(gcc)3	225427626	225427634	https://asia.ensembl.org/Homo_sapiens/Location/View?r=1:225427626-225427634;db=core	1
(GCC)3	225471774	225471782	https://asia.ensembl.org/Homo_sapiens/Location/View?r=1:225471774-225471782;db=core	1
(GGC)3	225517425	225517433	https://asia.ensembl.org/Homo_sapiens/Location/View?r=1:225517425-225517433;db=core	1
(GCC)3	225653068	225653076	https://asia.ensembl.org/Homo_sapiens/Location/View?r=1:225653068-225653076;db=core	1
(GCC)3	225810140	225810148	https://asia.ensembl.org/Homo_sapiens/Location/View?r=1:225810140-225810148;db=core	1
(GCC)3	225811031	225811039	https://asia.ensembl.org/Homo_sapiens/Location/View?r=1:225811031-225811039;db=core	1
(gcc)3	226062733	226062741	https://asia.ensembl.org/Homo_sapiens/Location/View?r=1:226062733-226062741;db=core	1
(GGC)4	226062976	226062987	https://asia.ensembl.org/Homo_sapiens/Location/View?r=1:226062976-226062987;db=core	1
(gcc)3	226186481	226186489	https://asia.ensembl.org/Homo_sapiens/Location/View?r=1:226186481-226186489;db=core	1
(ggc)3	226548954	226548962	https://asia.ensembl.org/Homo_sapiens/Location/View?r=1:226548954-226548962;db=core	1
(GCC)3	226737383	226737391	https://asia.ensembl.org/Homo_sapiens/Location/View?r=1:226737383-226737391;db=core	1
(GGC)3	226870863	226870871	https://asia.ensembl.org/Homo_sapiens/Location/View?r=1:226870863-226870871;db=core	1
(gcc)3	227276552	227276560	https://asia.ensembl.org/Homo_sapiens/Location/View?r=1:227276552-227276560;db=core	1
(GCC)3	227734998	227735006	https://asia.ensembl.org/Homo_sapiens/Location/View?r=1:227734998-227735006;db=core	1
(GGC)3	227887784	227887792	https://asia.ensembl.org/Homo_sapiens/Location/View?r=1:227887784-227887792;db=core	1
(GGC)3	227946846	227946854	https://asia.ensembl.org/Homo_sapiens/Location/View?r=1:227946846-227946854;db=core	1
(GCC)3	227947945	227947953	https://asia.ensembl.org/Homo_sapiens/Location/View?r=1:227947945-227947953;db=core	1
(ggc)4	228082877	228082888	https://asia.ensembl.org/Homo_sapiens/Location/View?r=1:228082877-228082888;db=core	1
(GGC)3	228406599	228406607	https://asia.ensembl.org/Homo_sapiens/Location/View?r=1:228406599-228406607;db=core	1
(GCC)3	228487693	228487701	https://asia.ensembl.org/Homo_sapiens/Location/View?r=1:228487693-228487701;db=core	1
(GCC)3	228555293	228555301	https://asia.ensembl.org/Homo_sapiens/Location/View?r=1:228555293-228555301;db=core	1
(GGC)3	228556688	228556696	https://asia.ensembl.org/Homo_sapiens/Location/View?r=1:228556688-228556696;db=core	1
(ggc)3	228557761	228557769	https://asia.ensembl.org/Homo_sapiens/Location/View?r=1:228557761-228557769;db=core	1
(GGC)3	228608642	228608650	https://asia.ensembl.org/Homo_sapiens/Location/View?r=1:228608642-228608650;db=core	1
(ggc)3	228609743	228609751	https://asia.ensembl.org/Homo_sapiens/Location/View?r=1:228609743-228609751;db=core	1
(GGC)3	228610883	228610891	https://asia.ensembl.org/Homo_sapiens/Location/View?r=1:228610883-228610891;db=core	1
(ggc)3	228611984	228611992	https://asia.ensembl.org/Homo_sapiens/Location/View?r=1:228611984-228611992;db=core	1
(GGC)3	228613124	228613132	https://asia.ensembl.org/Homo_sapiens/Location/View?r=1:228613124-228613132;db=core	1
(ggc)3	228614225	228614233	https://asia.ensembl.org/Homo_sapiens/Location/View?r=1:228614225-228614233;db=core	1
(GGC)3	228615365	228615373	https://asia.ensembl.org/Homo_sapiens/Location/View?r=1:228615365-228615373;db=core	1
(ggc)3	228616466	228616474	https://asia.ensembl.org/Homo_sapiens/Location/View?r=1:228616466-228616474;db=core	1
(GGC)3	228617606	228617614	https://asia.ensembl.org/Homo_sapiens/Location/View?r=1:228617606-228617614;db=core	1
(ggc)3	228618707	228618715	https://asia.ensembl.org/Homo_sapiens/Location/View?r=1:228618707-228618715;db=core	1
(GGC)3	228619847	228619855	https://asia.ensembl.org/Homo_sapiens/Location/View?r=1:228619847-228619855;db=core	1
(GGC)3	228622062	228622070	https://asia.ensembl.org/Homo_sapiens/Location/View?r=1:228622062-228622070;db=core	1
(ggc)3	228623142	228623150	https://asia.ensembl.org/Homo_sapiens/Location/View?r=1:228623142-228623150;db=core	1
(GGC)3	228624282	228624290	https://asia.ensembl.org/Homo_sapiens/Location/View?r=1:228624282-228624290;db=core	1
(ggc)3	228625384	228625392	https://asia.ensembl.org/Homo_sapiens/Location/View?r=1:228625384-228625392;db=core	1
(GGC)3	228626524	228626532	https://asia.ensembl.org/Homo_sapiens/Location/View?r=1:228626524-228626532;db=core	1
(ggc)3	228627623	228627631	https://asia.ensembl.org/Homo_sapiens/Location/View?r=1:228627623-228627631;db=core	1
(GGC)3	228628763	228628771	https://asia.ensembl.org/Homo_sapiens/Location/View?r=1:228628763-228628771;db=core	1
(ggc)3	228629865	228629873	https://asia.ensembl.org/Homo_sapiens/Location/View?r=1:228629865-228629873;db=core	1
(GGC)3	228631005	228631013	https://asia.ensembl.org/Homo_sapiens/Location/View?r=1:228631005-228631013;db=core	1
(ggc)3	228632106	228632114	https://asia.ensembl.org/Homo_sapiens/Location/View?r=1:228632106-228632114;db=core	1
(GGC)3	228633246	228633254	https://asia.ensembl.org/Homo_sapiens/Location/View?r=1:228633246-228633254;db=core	1
(ggc)3	228634346	228634354	https://asia.ensembl.org/Homo_sapiens/Location/View?r=1:228634346-228634354;db=core	1
(GGC)3	228635485	228635493	https://asia.ensembl.org/Homo_sapiens/Location/View?r=1:228635485-228635493;db=core	1
(ggc)3	228636571	228636579	https://asia.ensembl.org/Homo_sapiens/Location/View?r=1:228636571-228636579;db=core	1
(GGC)3	228637711	228637719	https://asia.ensembl.org/Homo_sapiens/Location/View?r=1:228637711-228637719;db=core	1
(ggc)3	228638812	228638820	https://asia.ensembl.org/Homo_sapiens/Location/View?r=1:228638812-228638820;db=core	1
(GGC)3	228639952	228639960	https://asia.ensembl.org/Homo_sapiens/Location/View?r=1:228639952-228639960;db=core	1
(ggc)3	228641043	228641051	https://asia.ensembl.org/Homo_sapiens/Location/View?r=1:228641043-228641051;db=core	1
(GGC)3	228642183	228642191	https://asia.ensembl.org/Homo_sapiens/Location/View?r=1:228642183-228642191;db=core	1
(ggc)3	228643284	228643292	https://asia.ensembl.org/Homo_sapiens/Location/View?r=1:228643284-228643292;db=core	1
(GGC)3	228644424	228644432	https://asia.ensembl.org/Homo_sapiens/Location/View?r=1:228644424-228644432;db=core	1
(ggc)3	228645515	228645523	https://asia.ensembl.org/Homo_sapiens/Location/View?r=1:228645515-228645523;db=core	1
(GGC)3	228646655	228646663	https://asia.ensembl.org/Homo_sapiens/Location/View?r=1:228646655-228646663;db=core	1
(GCC)3	229228387	229228395	https://asia.ensembl.org/Homo_sapiens/Location/View?r=1:229228387-229228395;db=core	1
(GCC)3	229380984	229380992	https://asia.ensembl.org/Homo_sapiens/Location/View?r=1:229380984-229380992;db=core	1
(GCC)3	229432225	229432233	https://asia.ensembl.org/Homo_sapiens/Location/View?r=1:229432225-229432233;db=core	1
(GCC)4	229625914	229625925	https://asia.ensembl.org/Homo_sapiens/Location/View?r=1:229625914-229625925;db=core	1
(gcc)3	230067006	230067014	https://asia.ensembl.org/Homo_sapiens/Location/View?r=1:230067006-230067014;db=core	1
(GCC)3	230067164	230067172	https://asia.ensembl.org/Homo_sapiens/Location/View?r=1:230067164-230067172;db=core	1
(ggc)3	230067385	230067393	https://asia.ensembl.org/Homo_sapiens/Location/View?r=1:230067385-230067393;db=core	1
(GCC)3	230425935	230425943	https://asia.ensembl.org/Homo_sapiens/Location/View?r=1:230425935-230425943;db=core	1
(gcc)4	230978611	230978622	https://asia.ensembl.org/Homo_sapiens/Location/View?r=1:230978611-230978622;db=core	1
(gcc)8	231163724	231163747	https://asia.ensembl.org/Homo_sapiens/Location/View?r=1:231163724-231163747;db=core	1
(ggc)3	231163800	231163808	https://asia.ensembl.org/Homo_sapiens/Location/View?r=1:231163800-231163808;db=core	1
(GCC)3	231241265	231241273	https://asia.ensembl.org/Homo_sapiens/Location/View?r=1:231241265-231241273;db=core	1
(ggc)4	231337394	231337405	https://asia.ensembl.org/Homo_sapiens/Location/View?r=1:231337394-231337405;db=core	1
(GCC)3	231421354	231421362	https://asia.ensembl.org/Homo_sapiens/Location/View?r=1:231421354-231421362;db=core	1
(GGC)3	231421631	231421639	https://asia.ensembl.org/Homo_sapiens/Location/View?r=1:231421631-231421639;db=core	1
(ggc)6	231421888	231421905	https://asia.ensembl.org/Homo_sapiens/Location/View?r=1:231421888-231421905;db=core	1
(gcc)5	231422204	231422218	https://asia.ensembl.org/Homo_sapiens/Location/View?r=1:231422204-231422218;db=core	1
(GCC)3	231626897	231626905	https://asia.ensembl.org/Homo_sapiens/Location/View?r=1:231626897-231626905;db=core	1
(GGC)4	231626906	231626917	https://asia.ensembl.org/Homo_sapiens/Location/View?r=1:231626906-231626917;db=core	1
(GGC)3	231693864	231693872	https://asia.ensembl.org/Homo_sapiens/Location/View?r=1:231693864-231693872;db=core	1
(GGC)4	232629633	232629644	https://asia.ensembl.org/Homo_sapiens/Location/View?r=1:232629633-232629644;db=core	1
(GGC)3	233614152	233614160	https://asia.ensembl.org/Homo_sapiens/Location/View?r=1:233614152-233614160;db=core	1
(GGC)3	233904770	233904778	https://asia.ensembl.org/Homo_sapiens/Location/View?r=1:233904770-233904778;db=core	1
(gcc)3	234357008	234357016	https://asia.ensembl.org/Homo_sapiens/Location/View?r=1:234357008-234357016;db=core	1
(ggc)3	234608703	234608711	https://asia.ensembl.org/Homo_sapiens/Location/View?r=1:234608703-234608711;db=core	1
(GGC)3	234609039	234609047	https://asia.ensembl.org/Homo_sapiens/Location/View?r=1:234609039-234609047;db=core	1
(GGC)3	234609251	234609259	https://asia.ensembl.org/Homo_sapiens/Location/View?r=1:234609251-234609259;db=core	1
(GGC)6	234609633	234609650	https://asia.ensembl.org/Homo_sapiens/Location/View?r=1:234609633-234609650;db=core	1
(GGC)3	234610001	234610009	https://asia.ensembl.org/Homo_sapiens/Location/View?r=1:234610001-234610009;db=core	1
(GCC)3	234899664	234899672	https://asia.ensembl.org/Homo_sapiens/Location/View?r=1:234899664-234899672;db=core	1
(GGC)3	235128543	235128551	https://asia.ensembl.org/Homo_sapiens/Location/View?r=1:235128543-235128551;db=core	1
(GGC)3	235161335	235161343	https://asia.ensembl.org/Homo_sapiens/Location/View?r=1:235161335-235161343;db=core	1
(GGC)3	235328097	235328105	https://asia.ensembl.org/Homo_sapiens/Location/View?r=1:235328097-235328105;db=core	1
(GGC)3	235328790	235328798	https://asia.ensembl.org/Homo_sapiens/Location/View?r=1:235328790-235328798;db=core	1
(GGC)3	235504329	235504337	https://asia.ensembl.org/Homo_sapiens/Location/View?r=1:235504329-235504337;db=core	1
(GCC)4	235866909	235866920	https://asia.ensembl.org/Homo_sapiens/Location/View?r=1:235866909-235866920;db=core	1
(GGC)4	236142599	236142610	https://asia.ensembl.org/Homo_sapiens/Location/View?r=1:236142599-236142610;db=core	1
(gcc)3	236161767	236161775	https://asia.ensembl.org/Homo_sapiens/Location/View?r=1:236161767-236161775;db=core	1
(GGC)3	236686319	236686327	https://asia.ensembl.org/Homo_sapiens/Location/View?r=1:236686319-236686327;db=core	1
(ggc)3	236695306	236695314	https://asia.ensembl.org/Homo_sapiens/Location/View?r=1:236695306-236695314;db=core	1
(GCC)5	237042458	237042472	https://asia.ensembl.org/Homo_sapiens/Location/View?r=1:237042458-237042472;db=core	1
(ggc)3	237899892	237899900	https://asia.ensembl.org/Homo_sapiens/Location/View?r=1:237899892-237899900;db=core	1
(ggc)3	238997568	238997576	https://asia.ensembl.org/Homo_sapiens/Location/View?r=1:238997568-238997576;db=core	1
(ggc)4	240091776	240091787	https://asia.ensembl.org/Homo_sapiens/Location/View?r=1:240091776-240091787;db=core	1
(GCC)3	240092000	240092008	https://asia.ensembl.org/Homo_sapiens/Location/View?r=1:240092000-240092008;db=core	1
(ggc)5	240092268	240092282	https://asia.ensembl.org/Homo_sapiens/Location/View?r=1:240092268-240092282;db=core	1
(GGC)4	240492905	240492916	https://asia.ensembl.org/Homo_sapiens/Location/View?r=1:240492905-240492916;db=core	1
(GCC)3	241357304	241357312	https://asia.ensembl.org/Homo_sapiens/Location/View?r=1:241357304-241357312;db=core	1
(GGC)3	241958239	241958247	https://asia.ensembl.org/Homo_sapiens/Location/View?r=1:241958239-241958247;db=core	1
(GGC)5	242524718	242524732	https://asia.ensembl.org/Homo_sapiens/Location/View?r=1:242524718-242524732;db=core	1
(GCC)4	242524805	242524816	https://asia.ensembl.org/Homo_sapiens/Location/View?r=1:242524805-242524816;db=core	1
(GGC)3	242890452	242890460	https://asia.ensembl.org/Homo_sapiens/Location/View?r=1:242890452-242890460;db=core	1
(ggc)3	243483180	243483188	https://asia.ensembl.org/Homo_sapiens/Location/View?r=1:243483180-243483188;db=core	1
(GCC)4	243849234	243849245	https://asia.ensembl.org/Homo_sapiens/Location/View?r=1:243849234-243849245;db=core	1
(ggc)8	243850295	243850318	https://asia.ensembl.org/Homo_sapiens/Location/View?r=1:243850295-243850318;db=core	1
(ggc)3	243850341	243850349	https://asia.ensembl.org/Homo_sapiens/Location/View?r=1:243850341-243850349;db=core	1
(GGC)3	243850451	243850459	https://asia.ensembl.org/Homo_sapiens/Location/View?r=1:243850451-243850459;db=core	1
(gcc)3	243850575	243850583	https://asia.ensembl.org/Homo_sapiens/Location/View?r=1:243850575-243850583;db=core	1
(GGC)3	244653291	244653299	https://asia.ensembl.org/Homo_sapiens/Location/View?r=1:244653291-244653299;db=core	1
(GCC)3	244730748	244730756	https://asia.ensembl.org/Homo_sapiens/Location/View?r=1:244730748-244730756;db=core	1
(GGC)3	244835611	244835619	https://asia.ensembl.org/Homo_sapiens/Location/View?r=1:244835611-244835619;db=core	1
(ggc)3	244864401	244864409	https://asia.ensembl.org/Homo_sapiens/Location/View?r=1:244864401-244864409;db=core	1
(GCC)4	244970885	244970896	https://asia.ensembl.org/Homo_sapiens/Location/View?r=1:244970885-244970896;db=core	1
(GCC)3	246931744	246931752	https://asia.ensembl.org/Homo_sapiens/Location/View?r=1:246931744-246931752;db=core	1
(ggc)3	247111575	247111583	https://asia.ensembl.org/Homo_sapiens/Location/View?r=1:247111575-247111583;db=core	1
(GCC)3	247112274	247112282	https://asia.ensembl.org/Homo_sapiens/Location/View?r=1:247112274-247112282;db=core	1
(gcc)3	247365213	247365221	https://asia.ensembl.org/Homo_sapiens/Location/View?r=1:247365213-247365221;db=core	1
(gcc)3	247522314	247522322	https://asia.ensembl.org/Homo_sapiens/Location/View?r=1:247522314-247522322;db=core	1
(gcc)3	248830336	248830344	https://asia.ensembl.org/Homo_sapiens/Location/View?r=1:248830336-248830344;db=core	1
(GGC)3	505490	505498	https://asia.ensembl.org/Homo_sapiens/Location/View?r=2:505490-505498;db=core	2
(GGC)3	582816	582824	https://asia.ensembl.org/Homo_sapiens/Location/View?r=2:582816-582824;db=core	2
(GGC)4	582982	582993	https://asia.ensembl.org/Homo_sapiens/Location/View?r=2:582982-582993;db=core	2
(GGC)3	583079	583087	https://asia.ensembl.org/Homo_sapiens/Location/View?r=2:583079-583087;db=core	2
(gcc)3	592925	592933	https://asia.ensembl.org/Homo_sapiens/Location/View?r=2:592925-592933;db=core	2
(GCC)3	1289303	1289311	https://asia.ensembl.org/Homo_sapiens/Location/View?r=2:1289303-1289311;db=core	2
(GCC)3	1423146	1423154	https://asia.ensembl.org/Homo_sapiens/Location/View?r=2:1423146-1423154;db=core	2
(GGC)3	1751347	1751355	https://asia.ensembl.org/Homo_sapiens/Location/View?r=2:1751347-1751355;db=core	2
(GCC)3	1991271	1991279	https://asia.ensembl.org/Homo_sapiens/Location/View?r=2:1991271-1991279;db=core	2
(GGC)3	3176214	3176222	https://asia.ensembl.org/Homo_sapiens/Location/View?r=2:3176214-3176222;db=core	2
(GGC)3	3282638	3282646	https://asia.ensembl.org/Homo_sapiens/Location/View?r=2:3282638-3282646;db=core	2
(GGC)3	3387635	3387643	https://asia.ensembl.org/Homo_sapiens/Location/View?r=2:3387635-3387643;db=core	2
(GCC)3	3500542	3500550	https://asia.ensembl.org/Homo_sapiens/Location/View?r=2:3500542-3500550;db=core	2
(GCC)3	4221273	4221281	https://asia.ensembl.org/Homo_sapiens/Location/View?r=2:4221273-4221281;db=core	2
(GCC)3	5588018	5588026	https://asia.ensembl.org/Homo_sapiens/Location/View?r=2:5588018-5588026;db=core	2
(GGC)4	5693345	5693356	https://asia.ensembl.org/Homo_sapiens/Location/View?r=2:5693345-5693356;db=core	2
(GCC)3	6773348	6773356	https://asia.ensembl.org/Homo_sapiens/Location/View?r=2:6773348-6773356;db=core	2
(GCC)3	6918242	6918250	https://asia.ensembl.org/Homo_sapiens/Location/View?r=2:6918242-6918250;db=core	2
(GGC)3	6920104	6920112	https://asia.ensembl.org/Homo_sapiens/Location/View?r=2:6920104-6920112;db=core	2
(GGC)3	7325050	7325058	https://asia.ensembl.org/Homo_sapiens/Location/View?r=2:7325050-7325058;db=core	2
(gcc)3	9206742	9206750	https://asia.ensembl.org/Homo_sapiens/Location/View?r=2:9206742-9206750;db=core	2
(GGC)3	9207056	9207064	https://asia.ensembl.org/Homo_sapiens/Location/View?r=2:9207056-9207064;db=core	2
(GGC)3	9631363	9631371	https://asia.ensembl.org/Homo_sapiens/Location/View?r=2:9631363-9631371;db=core	2
(ggc)3	9718267	9718275	https://asia.ensembl.org/Homo_sapiens/Location/View?r=2:9718267-9718275;db=core	2
(gcc)5	9951743	9951757	https://asia.ensembl.org/Homo_sapiens/Location/View?r=2:9951743-9951757;db=core	2
(gcc)3	10043179	10043187	https://asia.ensembl.org/Homo_sapiens/Location/View?r=2:10043179-10043187;db=core	2
(GCC)6	10043621	10043638	https://asia.ensembl.org/Homo_sapiens/Location/View?r=2:10043621-10043638;db=core	2
(ggc)3	10043920	10043928	https://asia.ensembl.org/Homo_sapiens/Location/View?r=2:10043920-10043928;db=core	2
(GCC)3	10080095	10080103	https://asia.ensembl.org/Homo_sapiens/Location/View?r=2:10080095-10080103;db=core	2
(GGC)3	10122439	10122447	https://asia.ensembl.org/Homo_sapiens/Location/View?r=2:10122439-10122447;db=core	2
(GCC)3	10303115	10303123	https://asia.ensembl.org/Homo_sapiens/Location/View?r=2:10303115-10303123;db=core	2
(ggc)6	10448293	10448310	https://asia.ensembl.org/Homo_sapiens/Location/View?r=2:10448293-10448310;db=core	2
(GGC)3	10935664	10935672	https://asia.ensembl.org/Homo_sapiens/Location/View?r=2:10935664-10935672;db=core	2
(GCC)3	11344543	11344551	https://asia.ensembl.org/Homo_sapiens/Location/View?r=2:11344543-11344551;db=core	2
(GGC)3	11465699	11465707	https://asia.ensembl.org/Homo_sapiens/Location/View?r=2:11465699-11465707;db=core	2
(GGC)3	11634373	11634381	https://asia.ensembl.org/Homo_sapiens/Location/View?r=2:11634373-11634381;db=core	2
(GCC)3	11746678	11746686	https://asia.ensembl.org/Homo_sapiens/Location/View?r=2:11746678-11746686;db=core	2
(ggc)3	13040194	13040202	https://asia.ensembl.org/Homo_sapiens/Location/View?r=2:13040194-13040202;db=core	2
(GGC)3	15592240	15592248	https://asia.ensembl.org/Homo_sapiens/Location/View?r=2:15592240-15592248;db=core	2
(GCC)3	16013337	16013345	https://asia.ensembl.org/Homo_sapiens/Location/View?r=2:16013337-16013345;db=core	2
(GCC)3	17844466	17844474	https://asia.ensembl.org/Homo_sapiens/Location/View?r=2:17844466-17844474;db=core	2
(GGC)3	17878569	17878577	https://asia.ensembl.org/Homo_sapiens/Location/View?r=2:17878569-17878577;db=core	2
(GCC)3	18560616	18560624	https://asia.ensembl.org/Homo_sapiens/Location/View?r=2:18560616-18560624;db=core	2
(GGC)3	19748924	19748932	https://asia.ensembl.org/Homo_sapiens/Location/View?r=2:19748924-19748932;db=core	2
(GGC)3	19901415	19901423	https://asia.ensembl.org/Homo_sapiens/Location/View?r=2:19901415-19901423;db=core	2
(GGC)3	20201929	20201937	https://asia.ensembl.org/Homo_sapiens/Location/View?r=2:20201929-20201937;db=core	2
(GGC)3	20350336	20350344	https://asia.ensembl.org/Homo_sapiens/Location/View?r=2:20350336-20350344;db=core	2
(ggc)8	20667362	20667385	https://asia.ensembl.org/Homo_sapiens/Location/View?r=2:20667362-20667385;db=core	2
(GGC)4	21124219	21124230	https://asia.ensembl.org/Homo_sapiens/Location/View?r=2:21124219-21124230;db=core	2
(GCC)7	23385448	23385468	https://asia.ensembl.org/Homo_sapiens/Location/View?r=2:23385448-23385468;db=core	2
(ggc)4	23385565	23385576	https://asia.ensembl.org/Homo_sapiens/Location/View?r=2:23385565-23385576;db=core	2
(gcc)4	23387038	23387049	https://asia.ensembl.org/Homo_sapiens/Location/View?r=2:23387038-23387049;db=core	2
(GGC)3	23670165	23670173	https://asia.ensembl.org/Homo_sapiens/Location/View?r=2:23670165-23670173;db=core	2
(GGC)3	23940538	23940546	https://asia.ensembl.org/Homo_sapiens/Location/View?r=2:23940538-23940546;db=core	2
(GGC)3	24123319	24123327	https://asia.ensembl.org/Homo_sapiens/Location/View?r=2:24123319-24123327;db=core	2
(GCC)3	24123407	24123415	https://asia.ensembl.org/Homo_sapiens/Location/View?r=2:24123407-24123415;db=core	2
(GCC)3	24360439	24360447	https://asia.ensembl.org/Homo_sapiens/Location/View?r=2:24360439-24360447;db=core	2
(ggc)4	24491247	24491258	https://asia.ensembl.org/Homo_sapiens/Location/View?r=2:24491247-24491258;db=core	2
(GCC)3	24491538	24491546	https://asia.ensembl.org/Homo_sapiens/Location/View?r=2:24491538-24491546;db=core	2
(GGC)4	24491588	24491599	https://asia.ensembl.org/Homo_sapiens/Location/View?r=2:24491588-24491599;db=core	2
(gcc)3	24491968	24491976	https://asia.ensembl.org/Homo_sapiens/Location/View?r=2:24491968-24491976;db=core	2
(GGC)3	24920010	24920018	https://asia.ensembl.org/Homo_sapiens/Location/View?r=2:24920010-24920018;db=core	2
(GCC)3	25042203	25042211	https://asia.ensembl.org/Homo_sapiens/Location/View?r=2:25042203-25042211;db=core	2
(ggc)3	25087094	25087102	https://asia.ensembl.org/Homo_sapiens/Location/View?r=2:25087094-25087102;db=core	2
(GCC)3	25289833	25289841	https://asia.ensembl.org/Homo_sapiens/Location/View?r=2:25289833-25289841;db=core	2
(GCC)3	25340576	25340584	https://asia.ensembl.org/Homo_sapiens/Location/View?r=2:25340576-25340584;db=core	2
(gcc)3	25341258	25341266	https://asia.ensembl.org/Homo_sapiens/Location/View?r=2:25341258-25341266;db=core	2
(GGC)3	25377000	25377008	https://asia.ensembl.org/Homo_sapiens/Location/View?r=2:25377000-25377008;db=core	2
(ggc)4	26184409	26184420	https://asia.ensembl.org/Homo_sapiens/Location/View?r=2:26184409-26184420;db=core	2
(GGC)3	26479304	26479312	https://asia.ensembl.org/Homo_sapiens/Location/View?r=2:26479304-26479312;db=core	2
(GCC)3	26709922	26709930	https://asia.ensembl.org/Homo_sapiens/Location/View?r=2:26709922-26709930;db=core	2
(ggc)3	26728193	26728201	https://asia.ensembl.org/Homo_sapiens/Location/View?r=2:26728193-26728201;db=core	2
(ggc)4	26728256	26728267	https://asia.ensembl.org/Homo_sapiens/Location/View?r=2:26728256-26728267;db=core	2
(ggc)4	26847946	26847957	https://asia.ensembl.org/Homo_sapiens/Location/View?r=2:26847946-26847957;db=core	2
(gcc)4	26848160	26848171	https://asia.ensembl.org/Homo_sapiens/Location/View?r=2:26848160-26848171;db=core	2
(GCC)3	27094644	27094652	https://asia.ensembl.org/Homo_sapiens/Location/View?r=2:27094644-27094652;db=core	2
(GCC)3	27118983	27118991	https://asia.ensembl.org/Homo_sapiens/Location/View?r=2:27118983-27118991;db=core	2
(GCC)3	27119022	27119030	https://asia.ensembl.org/Homo_sapiens/Location/View?r=2:27119022-27119030;db=core	2
(GCC)3	27307999	27308007	https://asia.ensembl.org/Homo_sapiens/Location/View?r=2:27307999-27308007;db=core	2
(ggc)3	27393384	27393392	https://asia.ensembl.org/Homo_sapiens/Location/View?r=2:27393384-27393392;db=core	2
(GGC)3	27409422	27409430	https://asia.ensembl.org/Homo_sapiens/Location/View?r=2:27409422-27409430;db=core	2
(GGC)3	27428948	27428956	https://asia.ensembl.org/Homo_sapiens/Location/View?r=2:27428948-27428956;db=core	2
(GCC)3	27443173	27443181	https://asia.ensembl.org/Homo_sapiens/Location/View?r=2:27443173-27443181;db=core	2
(GCC)3	27495185	27495193	https://asia.ensembl.org/Homo_sapiens/Location/View?r=2:27495185-27495193;db=core	2
(GGC)3	28367945	28367953	https://asia.ensembl.org/Homo_sapiens/Location/View?r=2:28367945-28367953;db=core	2
(GGC)3	28894707	28894715	https://asia.ensembl.org/Homo_sapiens/Location/View?r=2:28894707-28894715;db=core	2
(gcc)3	30231388	30231396	https://asia.ensembl.org/Homo_sapiens/Location/View?r=2:30231388-30231396;db=core	2
(GGC)3	30447428	30447436	https://asia.ensembl.org/Homo_sapiens/Location/View?r=2:30447428-30447436;db=core	2
(gcc)7	31138393	31138413	https://asia.ensembl.org/Homo_sapiens/Location/View?r=2:31138393-31138413;db=core	2
(GGC)3	31234516	31234524	https://asia.ensembl.org/Homo_sapiens/Location/View?r=2:31234516-31234524;db=core	2
(GGC)6	32010290	32010307	https://asia.ensembl.org/Homo_sapiens/Location/View?r=2:32010290-32010307;db=core	2
(GGC)3	32010450	32010458	https://asia.ensembl.org/Homo_sapiens/Location/View?r=2:32010450-32010458;db=core	2
(GGC)4	32063805	32063816	https://asia.ensembl.org/Homo_sapiens/Location/View?r=2:32063805-32063816;db=core	2
(GGC)3	32064269	32064277	https://asia.ensembl.org/Homo_sapiens/Location/View?r=2:32064269-32064277;db=core	2
(ggc)4	36356272	36356283	https://asia.ensembl.org/Homo_sapiens/Location/View?r=2:36356272-36356283;db=core	2
(GCC)4	37324577	37324588	https://asia.ensembl.org/Homo_sapiens/Location/View?r=2:37324577-37324588;db=core	2
(ggc)3	37963924	37963932	https://asia.ensembl.org/Homo_sapiens/Location/View?r=2:37963924-37963932;db=core	2
(GGC)3	38077097	38077105	https://asia.ensembl.org/Homo_sapiens/Location/View?r=2:38077097-38077105;db=core	2
(GCC)3	38377540	38377548	https://asia.ensembl.org/Homo_sapiens/Location/View?r=2:38377540-38377548;db=core	2
(gcc)3	38528236	38528244	https://asia.ensembl.org/Homo_sapiens/Location/View?r=2:38528236-38528244;db=core	2
(gcc)5	38602455	38602469	https://asia.ensembl.org/Homo_sapiens/Location/View?r=2:38602455-38602469;db=core	2
(GGC)3	38602626	38602634	https://asia.ensembl.org/Homo_sapiens/Location/View?r=2:38602626-38602634;db=core	2
(GCC)3	38750908	38750916	https://asia.ensembl.org/Homo_sapiens/Location/View?r=2:38750908-38750916;db=core	2
(GGC)3	38960383	38960391	https://asia.ensembl.org/Homo_sapiens/Location/View?r=2:38960383-38960391;db=core	2
(GCC)4	38960552	38960563	https://asia.ensembl.org/Homo_sapiens/Location/View?r=2:38960552-38960563;db=core	2
(GGC)4	39120455	39120466	https://asia.ensembl.org/Homo_sapiens/Location/View?r=2:39120455-39120466;db=core	2
(GGC)3	39120654	39120662	https://asia.ensembl.org/Homo_sapiens/Location/View?r=2:39120654-39120662;db=core	2
(GCC)3	39120743	39120751	https://asia.ensembl.org/Homo_sapiens/Location/View?r=2:39120743-39120751;db=core	2
(gcc)4	39120979	39120990	https://asia.ensembl.org/Homo_sapiens/Location/View?r=2:39120979-39120990;db=core	2
(gcc)6	39437120	39437137	https://asia.ensembl.org/Homo_sapiens/Location/View?r=2:39437120-39437137;db=core	2
(ggc)3	39665927	39665935	https://asia.ensembl.org/Homo_sapiens/Location/View?r=2:39665927-39665935;db=core	2
(GGC)4	40452035	40452046	https://asia.ensembl.org/Homo_sapiens/Location/View?r=2:40452035-40452046;db=core	2
(gcc)4	42047708	42047719	https://asia.ensembl.org/Homo_sapiens/Location/View?r=2:42047708-42047719;db=core	2
(ggc)4	42568692	42568703	https://asia.ensembl.org/Homo_sapiens/Location/View?r=2:42568692-42568703;db=core	2
(GGC)3	43071857	43071865	https://asia.ensembl.org/Homo_sapiens/Location/View?r=2:43071857-43071865;db=core	2
(GGC)3	43224356	43224364	https://asia.ensembl.org/Homo_sapiens/Location/View?r=2:43224356-43224364;db=core	2
(GGC)4	43224633	43224644	https://asia.ensembl.org/Homo_sapiens/Location/View?r=2:43224633-43224644;db=core	2
(GGC)4	43224931	43224942	https://asia.ensembl.org/Homo_sapiens/Location/View?r=2:43224931-43224942;db=core	2
(GCC)3	43225365	43225373	https://asia.ensembl.org/Homo_sapiens/Location/View?r=2:43225365-43225373;db=core	2
(GCC)3	43225476	43225484	https://asia.ensembl.org/Homo_sapiens/Location/View?r=2:43225476-43225484;db=core	2
(GGC)3	43225674	43225682	https://asia.ensembl.org/Homo_sapiens/Location/View?r=2:43225674-43225682;db=core	2
(GCC)3	43226764	43226772	https://asia.ensembl.org/Homo_sapiens/Location/View?r=2:43226764-43226772;db=core	2
(ggc)3	44020906	44020914	https://asia.ensembl.org/Homo_sapiens/Location/View?r=2:44020906-44020914;db=core	2
(ggc)3	44169048	44169056	https://asia.ensembl.org/Homo_sapiens/Location/View?r=2:44169048-44169056;db=core	2
(GCC)3	44169477	44169485	https://asia.ensembl.org/Homo_sapiens/Location/View?r=2:44169477-44169485;db=core	2
(GCC)3	44883325	44883333	https://asia.ensembl.org/Homo_sapiens/Location/View?r=2:44883325-44883333;db=core	2
(GGC)3	44938871	44938879	https://asia.ensembl.org/Homo_sapiens/Location/View?r=2:44938871-44938879;db=core	2
(ggc)4	44942221	44942232	https://asia.ensembl.org/Homo_sapiens/Location/View?r=2:44942221-44942232;db=core	2
(ggc)7	44942290	44942310	https://asia.ensembl.org/Homo_sapiens/Location/View?r=2:44942290-44942310;db=core	2
(GGC)3	46429114	46429122	https://asia.ensembl.org/Homo_sapiens/Location/View?r=2:46429114-46429122;db=core	2
(GGC)3	46915891	46915899	https://asia.ensembl.org/Homo_sapiens/Location/View?r=2:46915891-46915899;db=core	2
(GGC)3	46941043	46941051	https://asia.ensembl.org/Homo_sapiens/Location/View?r=2:46941043-46941051;db=core	2
(GGC)3	47175784	47175792	https://asia.ensembl.org/Homo_sapiens/Location/View?r=2:47175784-47175792;db=core	2
(GCC)3	47176873	47176881	https://asia.ensembl.org/Homo_sapiens/Location/View?r=2:47176873-47176881;db=core	2
(ggc)3	47521109	47521117	https://asia.ensembl.org/Homo_sapiens/Location/View?r=2:47521109-47521117;db=core	2
(ggc)3	47521166	47521174	https://asia.ensembl.org/Homo_sapiens/Location/View?r=2:47521166-47521174;db=core	2
(ggc)4	47570282	47570293	https://asia.ensembl.org/Homo_sapiens/Location/View?r=2:47570282-47570293;db=core	2
(ggc)3	47905538	47905546	https://asia.ensembl.org/Homo_sapiens/Location/View?r=2:47905538-47905546;db=core	2
(ggc)3	49763726	49763734	https://asia.ensembl.org/Homo_sapiens/Location/View?r=2:49763726-49763734;db=core	2
(GGC)3	53860409	53860417	https://asia.ensembl.org/Homo_sapiens/Location/View?r=2:53860409-53860417;db=core	2
(GGC)3	53970972	53970980	https://asia.ensembl.org/Homo_sapiens/Location/View?r=2:53970972-53970980;db=core	2
(GCC)3	54290176	54290184	https://asia.ensembl.org/Homo_sapiens/Location/View?r=2:54290176-54290184;db=core	2
(GCC)3	54557903	54557911	https://asia.ensembl.org/Homo_sapiens/Location/View?r=2:54557903-54557911;db=core	2
(gcc)4	55050332	55050343	https://asia.ensembl.org/Homo_sapiens/Location/View?r=2:55050332-55050343;db=core	2
(GCC)4	55050507	55050518	https://asia.ensembl.org/Homo_sapiens/Location/View?r=2:55050507-55050518;db=core	2
(GGC)4	55223414	55223425	https://asia.ensembl.org/Homo_sapiens/Location/View?r=2:55223414-55223425;db=core	2
(GCC)3	55233161	55233169	https://asia.ensembl.org/Homo_sapiens/Location/View?r=2:55233161-55233169;db=core	2
(GCC)3	55617310	55617318	https://asia.ensembl.org/Homo_sapiens/Location/View?r=2:55617310-55617318;db=core	2
(ggc)5	55617380	55617394	https://asia.ensembl.org/Homo_sapiens/Location/View?r=2:55617380-55617394;db=core	2
(gcc)3	57232541	57232549	https://asia.ensembl.org/Homo_sapiens/Location/View?r=2:57232541-57232549;db=core	2
(GCC)3	58428964	58428972	https://asia.ensembl.org/Homo_sapiens/Location/View?r=2:58428964-58428972;db=core	2
(GGC)3	60383729	60383737	https://asia.ensembl.org/Homo_sapiens/Location/View?r=2:60383729-60383737;db=core	2
(gcc)5	60551850	60551864	https://asia.ensembl.org/Homo_sapiens/Location/View?r=2:60551850-60551864;db=core	2
(ggc)9	60553286	60553312	https://asia.ensembl.org/Homo_sapiens/Location/View?r=2:60553286-60553312;db=core	2
(gcc)6	60555286	60555303	https://asia.ensembl.org/Homo_sapiens/Location/View?r=2:60555286-60555303;db=core	2
(GCC)3	60581941	60581949	https://asia.ensembl.org/Homo_sapiens/Location/View?r=2:60581941-60581949;db=core	2
(gcc)3	60585539	60585547	https://asia.ensembl.org/Homo_sapiens/Location/View?r=2:60585539-60585547;db=core	2
(GCC)4	61065742	61065753	https://asia.ensembl.org/Homo_sapiens/Location/View?r=2:61065742-61065753;db=core	2
(GGC)3	61177626	61177634	https://asia.ensembl.org/Homo_sapiens/Location/View?r=2:61177626-61177634;db=core	2
(GCC)3	61190245	61190253	https://asia.ensembl.org/Homo_sapiens/Location/View?r=2:61190245-61190253;db=core	2
(GCC)3	61470698	61470706	https://asia.ensembl.org/Homo_sapiens/Location/View?r=2:61470698-61470706;db=core	2
(GGC)3	61470819	61470827	https://asia.ensembl.org/Homo_sapiens/Location/View?r=2:61470819-61470827;db=core	2
(gcc)4	61537470	61537481	https://asia.ensembl.org/Homo_sapiens/Location/View?r=2:61537470-61537481;db=core	2
(ggc)3	61585909	61585917	https://asia.ensembl.org/Homo_sapiens/Location/View?r=2:61585909-61585917;db=core	2
(ggc)4	62705964	62705975	https://asia.ensembl.org/Homo_sapiens/Location/View?r=2:62705964-62705975;db=core	2
(gcc)4	64019028	64019039	https://asia.ensembl.org/Homo_sapiens/Location/View?r=2:64019028-64019039;db=core	2
(gcc)4	64019280	64019291	https://asia.ensembl.org/Homo_sapiens/Location/View?r=2:64019280-64019291;db=core	2
(GGC)4	64144365	64144376	https://asia.ensembl.org/Homo_sapiens/Location/View?r=2:64144365-64144376;db=core	2
(ggc)5	64524386	64524400	https://asia.ensembl.org/Homo_sapiens/Location/View?r=2:64524386-64524400;db=core	2
(GCC)3	64637505	64637513	https://asia.ensembl.org/Homo_sapiens/Location/View?r=2:64637505-64637513;db=core	2
(ggc)4	64653810	64653821	https://asia.ensembl.org/Homo_sapiens/Location/View?r=2:64653810-64653821;db=core	2
(GGC)3	64654302	64654310	https://asia.ensembl.org/Homo_sapiens/Location/View?r=2:64654302-64654310;db=core	2
(GGC)3	64751647	64751655	https://asia.ensembl.org/Homo_sapiens/Location/View?r=2:64751647-64751655;db=core	2
(gcc)4	65129927	65129938	https://asia.ensembl.org/Homo_sapiens/Location/View?r=2:65129927-65129938;db=core	2
(gcc)3	65129960	65129968	https://asia.ensembl.org/Homo_sapiens/Location/View?r=2:65129960-65129968;db=core	2
(GGC)3	65205054	65205062	https://asia.ensembl.org/Homo_sapiens/Location/View?r=2:65205054-65205062;db=core	2
(GGC)3	68251870	68251878	https://asia.ensembl.org/Homo_sapiens/Location/View?r=2:68251870-68251878;db=core	2
(ggc)3	68527657	68527665	https://asia.ensembl.org/Homo_sapiens/Location/View?r=2:68527657-68527665;db=core	2
(GGC)3	69013783	69013791	https://asia.ensembl.org/Homo_sapiens/Location/View?r=2:69013783-69013791;db=core	2
(gcc)3	69378150	69378158	https://asia.ensembl.org/Homo_sapiens/Location/View?r=2:69378150-69378158;db=core	2
(GGC)4	69829820	69829831	https://asia.ensembl.org/Homo_sapiens/Location/View?r=2:69829820-69829831;db=core	2
(GGC)3	69915332	69915340	https://asia.ensembl.org/Homo_sapiens/Location/View?r=2:69915332-69915340;db=core	2
(GCC)3	70086883	70086891	https://asia.ensembl.org/Homo_sapiens/Location/View?r=2:70086883-70086891;db=core	2
(GCC)3	70125290	70125298	https://asia.ensembl.org/Homo_sapiens/Location/View?r=2:70125290-70125298;db=core	2
(GGC)3	70706367	70706375	https://asia.ensembl.org/Homo_sapiens/Location/View?r=2:70706367-70706375;db=core	2
(ggc)3	70767480	70767488	https://asia.ensembl.org/Homo_sapiens/Location/View?r=2:70767480-70767488;db=core	2
(GGC)3	70871753	70871761	https://asia.ensembl.org/Homo_sapiens/Location/View?r=2:70871753-70871761;db=core	2
(GCC)3	71453625	71453633	https://asia.ensembl.org/Homo_sapiens/Location/View?r=2:71453625-71453633;db=core	2
(GGC)3	71560669	71560677	https://asia.ensembl.org/Homo_sapiens/Location/View?r=2:71560669-71560677;db=core	2
(ggc)12	72148639	72148674	https://asia.ensembl.org/Homo_sapiens/Location/View?r=2:72148639-72148674;db=core	2
(GGC)3	72917881	72917889	https://asia.ensembl.org/Homo_sapiens/Location/View?r=2:72917881-72917889;db=core	2
(GGC)3	72918058	72918066	https://asia.ensembl.org/Homo_sapiens/Location/View?r=2:72918058-72918066;db=core	2
(GCC)4	73071667	73071678	https://asia.ensembl.org/Homo_sapiens/Location/View?r=2:73071667-73071678;db=core	2
(GGC)3	73088854	73088862	https://asia.ensembl.org/Homo_sapiens/Location/View?r=2:73088854-73088862;db=core	2
(GGC)3	73112462	73112470	https://asia.ensembl.org/Homo_sapiens/Location/View?r=2:73112462-73112470;db=core	2
(gcc)3	73112918	73112926	https://asia.ensembl.org/Homo_sapiens/Location/View?r=2:73112918-73112926;db=core	2
(GCC)3	73113495	73113503	https://asia.ensembl.org/Homo_sapiens/Location/View?r=2:73113495-73113503;db=core	2
(ggc)3	73269112	73269120	https://asia.ensembl.org/Homo_sapiens/Location/View?r=2:73269112-73269120;db=core	2
(GGC)5	73291874	73291888	https://asia.ensembl.org/Homo_sapiens/Location/View?r=2:73291874-73291888;db=core	2
(GGC)3	73293509	73293517	https://asia.ensembl.org/Homo_sapiens/Location/View?r=2:73293509-73293517;db=core	2
(ggc)6	73985061	73985078	https://asia.ensembl.org/Homo_sapiens/Location/View?r=2:73985061-73985078;db=core	2
(ggc)4	73985091	73985102	https://asia.ensembl.org/Homo_sapiens/Location/View?r=2:73985091-73985102;db=core	2
(GCC)3	74002705	74002713	https://asia.ensembl.org/Homo_sapiens/Location/View?r=2:74002705-74002713;db=core	2
(GGC)3	74120609	74120617	https://asia.ensembl.org/Homo_sapiens/Location/View?r=2:74120609-74120617;db=core	2
(GCC)3	74147942	74147950	https://asia.ensembl.org/Homo_sapiens/Location/View?r=2:74147942-74147950;db=core	2
(GCC)3	74178783	74178791	https://asia.ensembl.org/Homo_sapiens/Location/View?r=2:74178783-74178791;db=core	2
(GCC)3	74422192	74422200	https://asia.ensembl.org/Homo_sapiens/Location/View?r=2:74422192-74422200;db=core	2
(GGC)3	74497910	74497918	https://asia.ensembl.org/Homo_sapiens/Location/View?r=2:74497910-74497918;db=core	2
(GGC)3	74513368	74513376	https://asia.ensembl.org/Homo_sapiens/Location/View?r=2:74513368-74513376;db=core	2
(GCC)3	74515078	74515086	https://asia.ensembl.org/Homo_sapiens/Location/View?r=2:74515078-74515086;db=core	2
(ggc)6	74958681	74958698	https://asia.ensembl.org/Homo_sapiens/Location/View?r=2:74958681-74958698;db=core	2
(GCC)3	75199470	75199478	https://asia.ensembl.org/Homo_sapiens/Location/View?r=2:75199470-75199478;db=core	2
(GCC)3	79513110	79513118	https://asia.ensembl.org/Homo_sapiens/Location/View?r=2:79513110-79513118;db=core	2
(ggc)3	83878125	83878133	https://asia.ensembl.org/Homo_sapiens/Location/View?r=2:83878125-83878133;db=core	2
(GGC)3	84459197	84459205	https://asia.ensembl.org/Homo_sapiens/Location/View?r=2:84459197-84459205;db=core	2
(GCC)3	84881282	84881290	https://asia.ensembl.org/Homo_sapiens/Location/View?r=2:84881282-84881290;db=core	2
(gcc)3	84909917	84909925	https://asia.ensembl.org/Homo_sapiens/Location/View?r=2:84909917-84909925;db=core	2
(GGC)3	85133439	85133447	https://asia.ensembl.org/Homo_sapiens/Location/View?r=2:85133439-85133447;db=core	2
(ggc)7	85133705	85133725	https://asia.ensembl.org/Homo_sapiens/Location/View?r=2:85133705-85133725;db=core	2
(ggc)3	85133735	85133743	https://asia.ensembl.org/Homo_sapiens/Location/View?r=2:85133735-85133743;db=core	2
(GGC)4	85584471	85584482	https://asia.ensembl.org/Homo_sapiens/Location/View?r=2:85584471-85584482;db=core	2
(ggc)4	85611848	85611859	https://asia.ensembl.org/Homo_sapiens/Location/View?r=2:85611848-85611859;db=core	2
(GGC)3	85753874	85753882	https://asia.ensembl.org/Homo_sapiens/Location/View?r=2:85753874-85753882;db=core	2
(GGC)3	85811268	85811276	https://asia.ensembl.org/Homo_sapiens/Location/View?r=2:85811268-85811276;db=core	2
(GCC)3	86105742	86105750	https://asia.ensembl.org/Homo_sapiens/Location/View?r=2:86105742-86105750;db=core	2
(GGC)3	86195340	86195348	https://asia.ensembl.org/Homo_sapiens/Location/View?r=2:86195340-86195348;db=core	2
(GCC)3	86337612	86337620	https://asia.ensembl.org/Homo_sapiens/Location/View?r=2:86337612-86337620;db=core	2
(ggc)6	86337683	86337700	https://asia.ensembl.org/Homo_sapiens/Location/View?r=2:86337683-86337700;db=core	2
(GCC)3	86563283	86563291	https://asia.ensembl.org/Homo_sapiens/Location/View?r=2:86563283-86563291;db=core	2
(GGC)3	86790535	86790543	https://asia.ensembl.org/Homo_sapiens/Location/View?r=2:86790535-86790543;db=core	2
(ggc)5	86913984	86913998	https://asia.ensembl.org/Homo_sapiens/Location/View?r=2:86913984-86913998;db=core	2
(ggc)13	86914018	86914056	https://asia.ensembl.org/Homo_sapiens/Location/View?r=2:86914018-86914056;db=core	2
(ggc)10	86914082	86914111	https://asia.ensembl.org/Homo_sapiens/Location/View?r=2:86914082-86914111;db=core	2
(ggc)10	86914131	86914160	https://asia.ensembl.org/Homo_sapiens/Location/View?r=2:86914131-86914160;db=core	2
(ggc)5	86914208	86914222	https://asia.ensembl.org/Homo_sapiens/Location/View?r=2:86914208-86914222;db=core	2
(ggc)7	86914236	86914256	https://asia.ensembl.org/Homo_sapiens/Location/View?r=2:86914236-86914256;db=core	2
(ggc)12	86914283	86914318	https://asia.ensembl.org/Homo_sapiens/Location/View?r=2:86914283-86914318;db=core	2
(ggc)11	86914332	86914364	https://asia.ensembl.org/Homo_sapiens/Location/View?r=2:86914332-86914364;db=core	2
(ggc)9	86914378	86914404	https://asia.ensembl.org/Homo_sapiens/Location/View?r=2:86914378-86914404;db=core	2
(ggc)19	86914418	86914474	https://asia.ensembl.org/Homo_sapiens/Location/View?r=2:86914418-86914474;db=core	2
(ggc)10	86914543	86914572	https://asia.ensembl.org/Homo_sapiens/Location/View?r=2:86914543-86914572;db=core	2
(ggc)7	86914610	86914630	https://asia.ensembl.org/Homo_sapiens/Location/View?r=2:86914610-86914630;db=core	2
(ggc)8	86914644	86914667	https://asia.ensembl.org/Homo_sapiens/Location/View?r=2:86914644-86914667;db=core	2
(ggc)9	86914681	86914707	https://asia.ensembl.org/Homo_sapiens/Location/View?r=2:86914681-86914707;db=core	2
(ggc)11	86914721	86914753	https://asia.ensembl.org/Homo_sapiens/Location/View?r=2:86914721-86914753;db=core	2
(ggc)6	86914767	86914784	https://asia.ensembl.org/Homo_sapiens/Location/View?r=2:86914767-86914784;db=core	2
(ggc)12	86914798	86914833	https://asia.ensembl.org/Homo_sapiens/Location/View?r=2:86914798-86914833;db=core	2
(ggc)13	86914847	86914885	https://asia.ensembl.org/Homo_sapiens/Location/View?r=2:86914847-86914885;db=core	2
(ggc)3	86914899	86914907	https://asia.ensembl.org/Homo_sapiens/Location/View?r=2:86914899-86914907;db=core	2
(ggc)3	86914911	86914919	https://asia.ensembl.org/Homo_sapiens/Location/View?r=2:86914911-86914919;db=core	2
(ggc)7	86914933	86914953	https://asia.ensembl.org/Homo_sapiens/Location/View?r=2:86914933-86914953;db=core	2
(GGC)3	86942349	86942357	https://asia.ensembl.org/Homo_sapiens/Location/View?r=2:86942349-86942357;db=core	2
(GGC)3	86942371	86942379	https://asia.ensembl.org/Homo_sapiens/Location/View?r=2:86942371-86942379;db=core	2
(GGC)3	86942393	86942401	https://asia.ensembl.org/Homo_sapiens/Location/View?r=2:86942393-86942401;db=core	2
(GGC)5	86942483	86942497	https://asia.ensembl.org/Homo_sapiens/Location/View?r=2:86942483-86942497;db=core	2
(GGC)5	86942511	86942525	https://asia.ensembl.org/Homo_sapiens/Location/View?r=2:86942511-86942525;db=core	2
(GGC)5	86942539	86942553	https://asia.ensembl.org/Homo_sapiens/Location/View?r=2:86942539-86942553;db=core	2
(GGC)5	86942657	86942671	https://asia.ensembl.org/Homo_sapiens/Location/View?r=2:86942657-86942671;db=core	2
(GGC)3	87076066	87076074	https://asia.ensembl.org/Homo_sapiens/Location/View?r=2:87076066-87076074;db=core	2
(gcc)5	87824714	87824728	https://asia.ensembl.org/Homo_sapiens/Location/View?r=2:87824714-87824728;db=core	2
(gcc)9	87824742	87824768	https://asia.ensembl.org/Homo_sapiens/Location/View?r=2:87824742-87824768;db=core	2
(gcc)6	87824794	87824811	https://asia.ensembl.org/Homo_sapiens/Location/View?r=2:87824794-87824811;db=core	2
(gcc)6	87824825	87824842	https://asia.ensembl.org/Homo_sapiens/Location/View?r=2:87824825-87824842;db=core	2
(gcc)8	87824862	87824885	https://asia.ensembl.org/Homo_sapiens/Location/View?r=2:87824862-87824885;db=core	2
(gcc)8	87825373	87825396	https://asia.ensembl.org/Homo_sapiens/Location/View?r=2:87825373-87825396;db=core	2
(gcc)9	87825416	87825442	https://asia.ensembl.org/Homo_sapiens/Location/View?r=2:87825416-87825442;db=core	2
(gcc)3	87825512	87825520	https://asia.ensembl.org/Homo_sapiens/Location/View?r=2:87825512-87825520;db=core	2
(gcc)3	87825541	87825549	https://asia.ensembl.org/Homo_sapiens/Location/View?r=2:87825541-87825549;db=core	2
(gcc)3	87825563	87825571	https://asia.ensembl.org/Homo_sapiens/Location/View?r=2:87825563-87825571;db=core	2
(gcc)3	87825585	87825593	https://asia.ensembl.org/Homo_sapiens/Location/View?r=2:87825585-87825593;db=core	2
(gcc)3	87825607	87825615	https://asia.ensembl.org/Homo_sapiens/Location/View?r=2:87825607-87825615;db=core	2
(GGC)3	88055461	88055469	https://asia.ensembl.org/Homo_sapiens/Location/View?r=2:88055461-88055469;db=core	2
(GGC)5	88452284	88452298	https://asia.ensembl.org/Homo_sapiens/Location/View?r=2:88452284-88452298;db=core	2
(GGC)4	88452385	88452396	https://asia.ensembl.org/Homo_sapiens/Location/View?r=2:88452385-88452396;db=core	2
(GGC)3	88452457	88452465	https://asia.ensembl.org/Homo_sapiens/Location/View?r=2:88452457-88452465;db=core	2
(ggc)3	90325423	90325431	https://asia.ensembl.org/Homo_sapiens/Location/View?r=2:90325423-90325431;db=core	2
(ggc)3	90325526	90325534	https://asia.ensembl.org/Homo_sapiens/Location/View?r=2:90325526-90325534;db=core	2
(GCC)6	91748930	91748947	https://asia.ensembl.org/Homo_sapiens/Location/View?r=2:91748930-91748947;db=core	2
(GCC)3	92042365	92042373	https://asia.ensembl.org/Homo_sapiens/Location/View?r=2:92042365-92042373;db=core	2
(GCC)4	92073089	92073100	https://asia.ensembl.org/Homo_sapiens/Location/View?r=2:92073089-92073100;db=core	2
(GCC)3	94998297	94998305	https://asia.ensembl.org/Homo_sapiens/Location/View?r=2:94998297-94998305;db=core	2
(ggc)3	95025632	95025640	https://asia.ensembl.org/Homo_sapiens/Location/View?r=2:95025632-95025640;db=core	2
(GCC)3	95159789	95159797	https://asia.ensembl.org/Homo_sapiens/Location/View?r=2:95159789-95159797;db=core	2
(GGC)4	95345967	95345978	https://asia.ensembl.org/Homo_sapiens/Location/View?r=2:95345967-95345978;db=core	2
(GCC)3	95347233	95347241	https://asia.ensembl.org/Homo_sapiens/Location/View?r=2:95347233-95347241;db=core	2
(gcc)6	96010712	96010729	https://asia.ensembl.org/Homo_sapiens/Location/View?r=2:96010712-96010729;db=core	2
(GGC)3	96158022	96158030	https://asia.ensembl.org/Homo_sapiens/Location/View?r=2:96158022-96158030;db=core	2
(GCC)3	96691267	96691275	https://asia.ensembl.org/Homo_sapiens/Location/View?r=2:96691267-96691275;db=core	2
(GGC)3	96816279	96816287	https://asia.ensembl.org/Homo_sapiens/Location/View?r=2:96816279-96816287;db=core	2
(ggc)3	96817162	96817170	https://asia.ensembl.org/Homo_sapiens/Location/View?r=2:96817162-96817170;db=core	2
(GCC)5	96986539	96986553	https://asia.ensembl.org/Homo_sapiens/Location/View?r=2:96986539-96986553;db=core	2
(ggc)6	97094702	97094719	https://asia.ensembl.org/Homo_sapiens/Location/View?r=2:97094702-97094719;db=core	2
(GGC)3	97094983	97094991	https://asia.ensembl.org/Homo_sapiens/Location/View?r=2:97094983-97094991;db=core	2
(ggc)4	97995716	97995727	https://asia.ensembl.org/Homo_sapiens/Location/View?r=2:97995716-97995727;db=core	2
(GGC)3	98444997	98445005	https://asia.ensembl.org/Homo_sapiens/Location/View?r=2:98444997-98445005;db=core	2
(GCC)3	98576992	98577000	https://asia.ensembl.org/Homo_sapiens/Location/View?r=2:98576992-98577000;db=core	2
(gcc)4	98731096	98731107	https://asia.ensembl.org/Homo_sapiens/Location/View?r=2:98731096-98731107;db=core	2
(gcc)3	98731111	98731119	https://asia.ensembl.org/Homo_sapiens/Location/View?r=2:98731111-98731119;db=core	2
(GGC)3	98822664	98822672	https://asia.ensembl.org/Homo_sapiens/Location/View?r=2:98822664-98822672;db=core	2
(GCC)3	98898772	98898780	https://asia.ensembl.org/Homo_sapiens/Location/View?r=2:98898772-98898780;db=core	2
(GGC)3	99489535	99489543	https://asia.ensembl.org/Homo_sapiens/Location/View?r=2:99489535-99489543;db=core	2
(GCC)3	100104566	100104574	https://asia.ensembl.org/Homo_sapiens/Location/View?r=2:100104566-100104574;db=core	2
(gcc)8	100104798	100104821	https://asia.ensembl.org/Homo_sapiens/Location/View?r=2:100104798-100104821;db=core	2
(GGC)3	100105085	100105093	https://asia.ensembl.org/Homo_sapiens/Location/View?r=2:100105085-100105093;db=core	2
(ggc)5	100322058	100322072	https://asia.ensembl.org/Homo_sapiens/Location/View?r=2:100322058-100322072;db=core	2
(GGC)4	100417549	100417560	https://asia.ensembl.org/Homo_sapiens/Location/View?r=2:100417549-100417560;db=core	2
(GGC)3	101253201	101253209	https://asia.ensembl.org/Homo_sapiens/Location/View?r=2:101253201-101253209;db=core	2
(GCC)3	101386967	101386975	https://asia.ensembl.org/Homo_sapiens/Location/View?r=2:101386967-101386975;db=core	2
(ggc)3	101475538	101475546	https://asia.ensembl.org/Homo_sapiens/Location/View?r=2:101475538-101475546;db=core	2
(ggc)3	102067319	102067327	https://asia.ensembl.org/Homo_sapiens/Location/View?r=2:102067319-102067327;db=core	2
(gcc)3	103361884	103361892	https://asia.ensembl.org/Homo_sapiens/Location/View?r=2:103361884-103361892;db=core	2
(GCC)3	104659423	104659431	https://asia.ensembl.org/Homo_sapiens/Location/View?r=2:104659423-104659431;db=core	2
(ggc)3	104855322	104855330	https://asia.ensembl.org/Homo_sapiens/Location/View?r=2:104855322-104855330;db=core	2
(ggc)3	104855597	104855605	https://asia.ensembl.org/Homo_sapiens/Location/View?r=2:104855597-104855605;db=core	2
(ggc)6	104855612	104855629	https://asia.ensembl.org/Homo_sapiens/Location/View?r=2:104855612-104855629;db=core	2
(ggc)3	104855651	104855659	https://asia.ensembl.org/Homo_sapiens/Location/View?r=2:104855651-104855659;db=core	2
(gcc)5	104855840	104855854	https://asia.ensembl.org/Homo_sapiens/Location/View?r=2:104855840-104855854;db=core	2
(GCC)4	104855923	104855934	https://asia.ensembl.org/Homo_sapiens/Location/View?r=2:104855923-104855934;db=core	2
(gcc)7	104856098	104856118	https://asia.ensembl.org/Homo_sapiens/Location/View?r=2:104856098-104856118;db=core	2
(gcc)6	104857036	104857053	https://asia.ensembl.org/Homo_sapiens/Location/View?r=2:104857036-104857053;db=core	2
(gcc)9	104857087	104857113	https://asia.ensembl.org/Homo_sapiens/Location/View?r=2:104857087-104857113;db=core	2
(gcc)3	104857117	104857125	https://asia.ensembl.org/Homo_sapiens/Location/View?r=2:104857117-104857125;db=core	2
(gcc)3	105144013	105144021	https://asia.ensembl.org/Homo_sapiens/Location/View?r=2:105144013-105144021;db=core	2
(GCC)3	106466357	106466365	https://asia.ensembl.org/Homo_sapiens/Location/View?r=2:106466357-106466365;db=core	2
(GCC)3	106466627	106466635	https://asia.ensembl.org/Homo_sapiens/Location/View?r=2:106466627-106466635;db=core	2
(GCC)3	106466695	106466703	https://asia.ensembl.org/Homo_sapiens/Location/View?r=2:106466695-106466703;db=core	2
(GCC)3	106466717	106466725	https://asia.ensembl.org/Homo_sapiens/Location/View?r=2:106466717-106466725;db=core	2
(GCC)3	106466807	106466815	https://asia.ensembl.org/Homo_sapiens/Location/View?r=2:106466807-106466815;db=core	2
(GCC)3	106466875	106466883	https://asia.ensembl.org/Homo_sapiens/Location/View?r=2:106466875-106466883;db=core	2
(GCC)3	106466897	106466905	https://asia.ensembl.org/Homo_sapiens/Location/View?r=2:106466897-106466905;db=core	2
(gcc)3	106466990	106466998	https://asia.ensembl.org/Homo_sapiens/Location/View?r=2:106466990-106466998;db=core	2
(gcc)5	106467012	106467026	https://asia.ensembl.org/Homo_sapiens/Location/View?r=2:106467012-106467026;db=core	2
(GCC)3	106467176	106467184	https://asia.ensembl.org/Homo_sapiens/Location/View?r=2:106467176-106467184;db=core	2
(GCC)3	106467244	106467252	https://asia.ensembl.org/Homo_sapiens/Location/View?r=2:106467244-106467252;db=core	2
(GCC)3	106467266	106467274	https://asia.ensembl.org/Homo_sapiens/Location/View?r=2:106467266-106467274;db=core	2
(GCC)3	106467356	106467364	https://asia.ensembl.org/Homo_sapiens/Location/View?r=2:106467356-106467364;db=core	2
(GCC)3	106467424	106467432	https://asia.ensembl.org/Homo_sapiens/Location/View?r=2:106467424-106467432;db=core	2
(GCC)3	106467446	106467454	https://asia.ensembl.org/Homo_sapiens/Location/View?r=2:106467446-106467454;db=core	2
(GCC)3	106467536	106467544	https://asia.ensembl.org/Homo_sapiens/Location/View?r=2:106467536-106467544;db=core	2
(GCC)3	106467716	106467724	https://asia.ensembl.org/Homo_sapiens/Location/View?r=2:106467716-106467724;db=core	2
(GCC)3	106468076	106468084	https://asia.ensembl.org/Homo_sapiens/Location/View?r=2:106468076-106468084;db=core	2
(gcc)3	106468144	106468152	https://asia.ensembl.org/Homo_sapiens/Location/View?r=2:106468144-106468152;db=core	2
(gcc)3	106468166	106468174	https://asia.ensembl.org/Homo_sapiens/Location/View?r=2:106468166-106468174;db=core	2
(ggc)3	106487473	106487481	https://asia.ensembl.org/Homo_sapiens/Location/View?r=2:106487473-106487481;db=core	2
(GCC)3	106886935	106886943	https://asia.ensembl.org/Homo_sapiens/Location/View?r=2:106886935-106886943;db=core	2
(GGC)3	106887031	106887039	https://asia.ensembl.org/Homo_sapiens/Location/View?r=2:106887031-106887039;db=core	2
(GGC)3	107827219	107827227	https://asia.ensembl.org/Homo_sapiens/Location/View?r=2:107827219-107827227;db=core	2
(GGC)3	107827309	107827317	https://asia.ensembl.org/Homo_sapiens/Location/View?r=2:107827309-107827317;db=core	2
(GGC)3	107827399	107827407	https://asia.ensembl.org/Homo_sapiens/Location/View?r=2:107827399-107827407;db=core	2
(GGC)3	107827579	107827587	https://asia.ensembl.org/Homo_sapiens/Location/View?r=2:107827579-107827587;db=core	2
(GGC)3	107827669	107827677	https://asia.ensembl.org/Homo_sapiens/Location/View?r=2:107827669-107827677;db=core	2
(GGC)4	107827691	107827702	https://asia.ensembl.org/Homo_sapiens/Location/View?r=2:107827691-107827702;db=core	2
(GGC)3	107827784	107827792	https://asia.ensembl.org/Homo_sapiens/Location/View?r=2:107827784-107827792;db=core	2
(GGC)4	107827896	107827907	https://asia.ensembl.org/Homo_sapiens/Location/View?r=2:107827896-107827907;db=core	2
(GGC)3	107827989	107827997	https://asia.ensembl.org/Homo_sapiens/Location/View?r=2:107827989-107827997;db=core	2
(GGC)4	107828101	107828112	https://asia.ensembl.org/Homo_sapiens/Location/View?r=2:107828101-107828112;db=core	2
(GGC)4	107828216	107828227	https://asia.ensembl.org/Homo_sapiens/Location/View?r=2:107828216-107828227;db=core	2
(GGC)3	107828309	107828317	https://asia.ensembl.org/Homo_sapiens/Location/View?r=2:107828309-107828317;db=core	2
(GGC)3	107828399	107828407	https://asia.ensembl.org/Homo_sapiens/Location/View?r=2:107828399-107828407;db=core	2
(GGC)3	107828489	107828497	https://asia.ensembl.org/Homo_sapiens/Location/View?r=2:107828489-107828497;db=core	2
(GGC)4	107828601	107828612	https://asia.ensembl.org/Homo_sapiens/Location/View?r=2:107828601-107828612;db=core	2
(GGC)4	107828716	107828727	https://asia.ensembl.org/Homo_sapiens/Location/View?r=2:107828716-107828727;db=core	2
(GGC)3	107828809	107828817	https://asia.ensembl.org/Homo_sapiens/Location/View?r=2:107828809-107828817;db=core	2
(GGC)3	107828899	107828907	https://asia.ensembl.org/Homo_sapiens/Location/View?r=2:107828899-107828907;db=core	2
(GGC)3	107828989	107828997	https://asia.ensembl.org/Homo_sapiens/Location/View?r=2:107828989-107828997;db=core	2
(GGC)3	107829079	107829087	https://asia.ensembl.org/Homo_sapiens/Location/View?r=2:107829079-107829087;db=core	2
(GGC)3	107829169	107829177	https://asia.ensembl.org/Homo_sapiens/Location/View?r=2:107829169-107829177;db=core	2
(GGC)3	107829259	107829267	https://asia.ensembl.org/Homo_sapiens/Location/View?r=2:107829259-107829267;db=core	2
(GGC)3	107829349	107829357	https://asia.ensembl.org/Homo_sapiens/Location/View?r=2:107829349-107829357;db=core	2
(GGC)3	107829439	107829447	https://asia.ensembl.org/Homo_sapiens/Location/View?r=2:107829439-107829447;db=core	2
(GGC)3	107986716	107986724	https://asia.ensembl.org/Homo_sapiens/Location/View?r=2:107986716-107986724;db=core	2
(ggc)3	108449235	108449243	https://asia.ensembl.org/Homo_sapiens/Location/View?r=2:108449235-108449243;db=core	2
(GCC)3	108534124	108534132	https://asia.ensembl.org/Homo_sapiens/Location/View?r=2:108534124-108534132;db=core	2
(GGC)3	108712887	108712895	https://asia.ensembl.org/Homo_sapiens/Location/View?r=2:108712887-108712895;db=core	2
(GGC)3	108719719	108719727	https://asia.ensembl.org/Homo_sapiens/Location/View?r=2:108719719-108719727;db=core	2
(GCC)3	108786920	108786928	https://asia.ensembl.org/Homo_sapiens/Location/View?r=2:108786920-108786928;db=core	2
(GCC)3	109081759	109081767	https://asia.ensembl.org/Homo_sapiens/Location/View?r=2:109081759-109081767;db=core	2
(ggc)3	109129641	109129649	https://asia.ensembl.org/Homo_sapiens/Location/View?r=2:109129641-109129649;db=core	2
(ggc)10	109760400	109760429	https://asia.ensembl.org/Homo_sapiens/Location/View?r=2:109760400-109760429;db=core	2
(ggc)6	109760441	109760458	https://asia.ensembl.org/Homo_sapiens/Location/View?r=2:109760441-109760458;db=core	2
(GGC)3	109760594	109760602	https://asia.ensembl.org/Homo_sapiens/Location/View?r=2:109760594-109760602;db=core	2
(ggc)8	109794584	109794607	https://asia.ensembl.org/Homo_sapiens/Location/View?r=2:109794584-109794607;db=core	2
(ggc)5	109794614	109794628	https://asia.ensembl.org/Homo_sapiens/Location/View?r=2:109794614-109794628;db=core	2
(gcc)5	110610807	110610821	https://asia.ensembl.org/Homo_sapiens/Location/View?r=2:110610807-110610821;db=core	2
(gcc)4	110611035	110611046	https://asia.ensembl.org/Homo_sapiens/Location/View?r=2:110611035-110611046;db=core	2
(GCC)3	110678045	110678053	https://asia.ensembl.org/Homo_sapiens/Location/View?r=2:110678045-110678053;db=core	2
(GCC)3	110732963	110732971	https://asia.ensembl.org/Homo_sapiens/Location/View?r=2:110732963-110732971;db=core	2
(gcc)3	111120593	111120601	https://asia.ensembl.org/Homo_sapiens/Location/View?r=2:111120593-111120601;db=core	2
(gcc)14	111120979	111121020	https://asia.ensembl.org/Homo_sapiens/Location/View?r=2:111120979-111121020;db=core	2
(gcc)3	112071313	112071321	https://asia.ensembl.org/Homo_sapiens/Location/View?r=2:112071313-112071321;db=core	2
(GCC)3	112432948	112432956	https://asia.ensembl.org/Homo_sapiens/Location/View?r=2:112432948-112432956;db=core	2
(GCC)3	112432970	112432978	https://asia.ensembl.org/Homo_sapiens/Location/View?r=2:112432970-112432978;db=core	2
(GCC)3	112433059	112433067	https://asia.ensembl.org/Homo_sapiens/Location/View?r=2:112433059-112433067;db=core	2
(GCC)3	112433126	112433134	https://asia.ensembl.org/Homo_sapiens/Location/View?r=2:112433126-112433134;db=core	2
(GCC)3	112433148	112433156	https://asia.ensembl.org/Homo_sapiens/Location/View?r=2:112433148-112433156;db=core	2
(GCC)3	112433216	112433224	https://asia.ensembl.org/Homo_sapiens/Location/View?r=2:112433216-112433224;db=core	2
(GCC)3	112433238	112433246	https://asia.ensembl.org/Homo_sapiens/Location/View?r=2:112433238-112433246;db=core	2
(gcc)3	112433306	112433314	https://asia.ensembl.org/Homo_sapiens/Location/View?r=2:112433306-112433314;db=core	2
(gcc)4	112433328	112433339	https://asia.ensembl.org/Homo_sapiens/Location/View?r=2:112433328-112433339;db=core	2
(GGC)3	113291349	113291357	https://asia.ensembl.org/Homo_sapiens/Location/View?r=2:113291349-113291357;db=core	2
(GGC)3	113499481	113499489	https://asia.ensembl.org/Homo_sapiens/Location/View?r=2:113499481-113499489;db=core	2
(GCC)3	113890419	113890427	https://asia.ensembl.org/Homo_sapiens/Location/View?r=2:113890419-113890427;db=core	2
(gcc)3	117848125	117848133	https://asia.ensembl.org/Homo_sapiens/Location/View?r=2:117848125-117848133;db=core	2
(GCC)3	117860200	117860208	https://asia.ensembl.org/Homo_sapiens/Location/View?r=2:117860200-117860208;db=core	2
(gcc)9	118014106	118014132	https://asia.ensembl.org/Homo_sapiens/Location/View?r=2:118014106-118014132;db=core	2
(GCC)3	118310180	118310188	https://asia.ensembl.org/Homo_sapiens/Location/View?r=2:118310180-118310188;db=core	2
(gcc)3	118846486	118846494	https://asia.ensembl.org/Homo_sapiens/Location/View?r=2:118846486-118846494;db=core	2
(gcc)6	118846523	118846540	https://asia.ensembl.org/Homo_sapiens/Location/View?r=2:118846523-118846540;db=core	2
(gcc)5	118846553	118846567	https://asia.ensembl.org/Homo_sapiens/Location/View?r=2:118846553-118846567;db=core	2
(GCC)3	119156548	119156556	https://asia.ensembl.org/Homo_sapiens/Location/View?r=2:119156548-119156556;db=core	2
(GGC)4	120013400	120013411	https://asia.ensembl.org/Homo_sapiens/Location/View?r=2:120013400-120013411;db=core	2
(GCC)3	120223051	120223059	https://asia.ensembl.org/Homo_sapiens/Location/View?r=2:120223051-120223059;db=core	2
(GGC)3	120253088	120253096	https://asia.ensembl.org/Homo_sapiens/Location/View?r=2:120253088-120253096;db=core	2
(GGC)3	120546293	120546301	https://asia.ensembl.org/Homo_sapiens/Location/View?r=2:120546293-120546301;db=core	2
(GGC)3	120716856	120716864	https://asia.ensembl.org/Homo_sapiens/Location/View?r=2:120716856-120716864;db=core	2
(ggc)5	120735966	120735980	https://asia.ensembl.org/Homo_sapiens/Location/View?r=2:120735966-120735980;db=core	2
(GCC)3	120741842	120741850	https://asia.ensembl.org/Homo_sapiens/Location/View?r=2:120741842-120741850;db=core	2
(GCC)3	120867413	120867421	https://asia.ensembl.org/Homo_sapiens/Location/View?r=2:120867413-120867421;db=core	2
(GGC)3	121338524	121338532	https://asia.ensembl.org/Homo_sapiens/Location/View?r=2:121338524-121338532;db=core	2
(ggc)4	126558229	126558240	https://asia.ensembl.org/Homo_sapiens/Location/View?r=2:126558229-126558240;db=core	2
(GCC)3	127387342	127387350	https://asia.ensembl.org/Homo_sapiens/Location/View?r=2:127387342-127387350;db=core	2
(GGC)3	127631762	127631770	https://asia.ensembl.org/Homo_sapiens/Location/View?r=2:127631762-127631770;db=core	2
(GGC)3	127702098	127702106	https://asia.ensembl.org/Homo_sapiens/Location/View?r=2:127702098-127702106;db=core	2
(GGC)4	127715835	127715846	https://asia.ensembl.org/Homo_sapiens/Location/View?r=2:127715835-127715846;db=core	2
(GCC)4	127810327	127810338	https://asia.ensembl.org/Homo_sapiens/Location/View?r=2:127810327-127810338;db=core	2
(GGC)3	127885738	127885746	https://asia.ensembl.org/Homo_sapiens/Location/View?r=2:127885738-127885746;db=core	2
(ggc)7	127885995	127886015	https://asia.ensembl.org/Homo_sapiens/Location/View?r=2:127885995-127886015;db=core	2
(gcc)3	128208569	128208577	https://asia.ensembl.org/Homo_sapiens/Location/View?r=2:128208569-128208577;db=core	2
(GCC)3	128265955	128265963	https://asia.ensembl.org/Homo_sapiens/Location/View?r=2:128265955-128265963;db=core	2
(GGC)3	128425219	128425227	https://asia.ensembl.org/Homo_sapiens/Location/View?r=2:128425219-128425227;db=core	2
(GGC)4	129979915	129979926	https://asia.ensembl.org/Homo_sapiens/Location/View?r=2:129979915-129979926;db=core	2
(GGC)4	129992629	129992640	https://asia.ensembl.org/Homo_sapiens/Location/View?r=2:129992629-129992640;db=core	2
(GCC)4	130038037	130038048	https://asia.ensembl.org/Homo_sapiens/Location/View?r=2:130038037-130038048;db=core	2
(GCC)3	130140287	130140295	https://asia.ensembl.org/Homo_sapiens/Location/View?r=2:130140287-130140295;db=core	2
(GCC)3	130231124	130231132	https://asia.ensembl.org/Homo_sapiens/Location/View?r=2:130231124-130231132;db=core	2
(GGC)3	130963573	130963581	https://asia.ensembl.org/Homo_sapiens/Location/View?r=2:130963573-130963581;db=core	2
(GGC)4	131299352	131299363	https://asia.ensembl.org/Homo_sapiens/Location/View?r=2:131299352-131299363;db=core	2
(GCC)3	131299619	131299627	https://asia.ensembl.org/Homo_sapiens/Location/View?r=2:131299619-131299627;db=core	2
(ggc)5	131331155	131331169	https://asia.ensembl.org/Homo_sapiens/Location/View?r=2:131331155-131331169;db=core	2
(GCC)4	131353486	131353497	https://asia.ensembl.org/Homo_sapiens/Location/View?r=2:131353486-131353497;db=core	2
(GCC)4	131353580	131353591	https://asia.ensembl.org/Homo_sapiens/Location/View?r=2:131353580-131353591;db=core	2
(GCC)4	131363894	131363905	https://asia.ensembl.org/Homo_sapiens/Location/View?r=2:131363894-131363905;db=core	2
(GCC)4	131364125	131364136	https://asia.ensembl.org/Homo_sapiens/Location/View?r=2:131364125-131364136;db=core	2
(GGC)3	131425021	131425029	https://asia.ensembl.org/Homo_sapiens/Location/View?r=2:131425021-131425029;db=core	2
(gcc)7	131425327	131425347	https://asia.ensembl.org/Homo_sapiens/Location/View?r=2:131425327-131425347;db=core	2
(GCC)3	131425447	131425455	https://asia.ensembl.org/Homo_sapiens/Location/View?r=2:131425447-131425455;db=core	2
(GGC)3	131443125	131443133	https://asia.ensembl.org/Homo_sapiens/Location/View?r=2:131443125-131443133;db=core	2
(gcc)4	131724354	131724365	https://asia.ensembl.org/Homo_sapiens/Location/View?r=2:131724354-131724365;db=core	2
(GGC)3	134718873	134718881	https://asia.ensembl.org/Homo_sapiens/Location/View?r=2:134718873-134718881;db=core	2
(gcc)3	135106156	135106164	https://asia.ensembl.org/Homo_sapiens/Location/View?r=2:135106156-135106164;db=core	2
(GCC)3	138279112	138279120	https://asia.ensembl.org/Homo_sapiens/Location/View?r=2:138279112-138279120;db=core	2
(GCC)3	138501473	138501481	https://asia.ensembl.org/Homo_sapiens/Location/View?r=2:138501473-138501481;db=core	2
(gcc)6	138501745	138501762	https://asia.ensembl.org/Homo_sapiens/Location/View?r=2:138501745-138501762;db=core	2
(GGC)3	138780596	138780604	https://asia.ensembl.org/Homo_sapiens/Location/View?r=2:138780596-138780604;db=core	2
(GCC)3	144332538	144332546	https://asia.ensembl.org/Homo_sapiens/Location/View?r=2:144332538-144332546;db=core	2
(ggc)3	144655085	144655093	https://asia.ensembl.org/Homo_sapiens/Location/View?r=2:144655085-144655093;db=core	2
(gcc)7	147844409	147844429	https://asia.ensembl.org/Homo_sapiens/Location/View?r=2:147844409-147844429;db=core	2
(gcc)3	147844581	147844589	https://asia.ensembl.org/Homo_sapiens/Location/View?r=2:147844581-147844589;db=core	2
(gcc)4	147844767	147844778	https://asia.ensembl.org/Homo_sapiens/Location/View?r=2:147844767-147844778;db=core	2
(GGC)3	148644456	148644464	https://asia.ensembl.org/Homo_sapiens/Location/View?r=2:148644456-148644464;db=core	2
(ggc)3	149330508	149330516	https://asia.ensembl.org/Homo_sapiens/Location/View?r=2:149330508-149330516;db=core	2
(GGC)3	149587720	149587728	https://asia.ensembl.org/Homo_sapiens/Location/View?r=2:149587720-149587728;db=core	2
(GGC)3	152395910	152395918	https://asia.ensembl.org/Homo_sapiens/Location/View?r=2:152395910-152395918;db=core	2
(ggc)3	153478614	153478622	https://asia.ensembl.org/Homo_sapiens/Location/View?r=2:153478614-153478622;db=core	2
(GGC)4	153871926	153871937	https://asia.ensembl.org/Homo_sapiens/Location/View?r=2:153871926-153871937;db=core	2
(GCC)3	153872563	153872571	https://asia.ensembl.org/Homo_sapiens/Location/View?r=2:153872563-153872571;db=core	2
(gcc)4	154870965	154870976	https://asia.ensembl.org/Homo_sapiens/Location/View?r=2:154870965-154870976;db=core	2
(gcc)4	156334462	156334473	https://asia.ensembl.org/Homo_sapiens/Location/View?r=2:156334462-156334473;db=core	2
(ggc)4	158456928	158456939	https://asia.ensembl.org/Homo_sapiens/Location/View?r=2:158456928-158456939;db=core	2
(GGC)3	160239564	160239572	https://asia.ensembl.org/Homo_sapiens/Location/View?r=2:160239564-160239572;db=core	2
(GGC)4	160407277	160407288	https://asia.ensembl.org/Homo_sapiens/Location/View?r=2:160407277-160407288;db=core	2
(GCC)3	160407450	160407458	https://asia.ensembl.org/Homo_sapiens/Location/View?r=2:160407450-160407458;db=core	2
(ggc)4	160407539	160407550	https://asia.ensembl.org/Homo_sapiens/Location/View?r=2:160407539-160407550;db=core	2
(GCC)3	160407777	160407785	https://asia.ensembl.org/Homo_sapiens/Location/View?r=2:160407777-160407785;db=core	2
(GCC)3	160493111	160493119	https://asia.ensembl.org/Homo_sapiens/Location/View?r=2:160493111-160493119;db=core	2
(GCC)3	161308654	161308662	https://asia.ensembl.org/Homo_sapiens/Location/View?r=2:161308654-161308662;db=core	2
(GGC)3	161428210	161428218	https://asia.ensembl.org/Homo_sapiens/Location/View?r=2:161428210-161428218;db=core	2
(GGC)3	162019719	162019727	https://asia.ensembl.org/Homo_sapiens/Location/View?r=2:162019719-162019727;db=core	2
(GGC)3	165794093	165794101	https://asia.ensembl.org/Homo_sapiens/Location/View?r=2:165794093-165794101;db=core	2
(gcc)5	168247355	168247369	https://asia.ensembl.org/Homo_sapiens/Location/View?r=2:168247355-168247369;db=core	2
(ggc)3	168247655	168247663	https://asia.ensembl.org/Homo_sapiens/Location/View?r=2:168247655-168247663;db=core	2
(ggc)4	168456312	168456323	https://asia.ensembl.org/Homo_sapiens/Location/View?r=2:168456312-168456323;db=core	2
(ggc)4	168456337	168456348	https://asia.ensembl.org/Homo_sapiens/Location/View?r=2:168456337-168456348;db=core	2
(GCC)3	169289003	169289011	https://asia.ensembl.org/Homo_sapiens/Location/View?r=2:169289003-169289011;db=core	2
(GGC)3	169733735	169733743	https://asia.ensembl.org/Homo_sapiens/Location/View?r=2:169733735-169733743;db=core	2
(GGC)3	169799153	169799161	https://asia.ensembl.org/Homo_sapiens/Location/View?r=2:169799153-169799161;db=core	2
(ggc)4	169827509	169827520	https://asia.ensembl.org/Homo_sapiens/Location/View?r=2:169827509-169827520;db=core	2
(GGC)4	169827804	169827815	https://asia.ensembl.org/Homo_sapiens/Location/View?r=2:169827804-169827815;db=core	2
(GCC)3	170711983	170711991	https://asia.ensembl.org/Homo_sapiens/Location/View?r=2:170711983-170711991;db=core	2
(GCC)4	170716900	170716911	https://asia.ensembl.org/Homo_sapiens/Location/View?r=2:170716900-170716911;db=core	2
(GCC)4	171160336	171160347	https://asia.ensembl.org/Homo_sapiens/Location/View?r=2:171160336-171160347;db=core	2
(ggc)4	171160841	171160852	https://asia.ensembl.org/Homo_sapiens/Location/View?r=2:171160841-171160852;db=core	2
(GGC)4	171160903	171160914	https://asia.ensembl.org/Homo_sapiens/Location/View?r=2:171160903-171160914;db=core	2
(GCC)3	171517574	171517582	https://asia.ensembl.org/Homo_sapiens/Location/View?r=2:171517574-171517582;db=core	2
(GCC)3	171522491	171522499	https://asia.ensembl.org/Homo_sapiens/Location/View?r=2:171522491-171522499;db=core	2
(gcc)3	171774923	171774931	https://asia.ensembl.org/Homo_sapiens/Location/View?r=2:171774923-171774931;db=core	2
(GGC)3	172095687	172095695	https://asia.ensembl.org/Homo_sapiens/Location/View?r=2:172095687-172095695;db=core	2
(GGC)3	172101085	172101093	https://asia.ensembl.org/Homo_sapiens/Location/View?r=2:172101085-172101093;db=core	2
(GCC)3	172427791	172427799	https://asia.ensembl.org/Homo_sapiens/Location/View?r=2:172427791-172427799;db=core	2
(GGC)3	172555858	172555866	https://asia.ensembl.org/Homo_sapiens/Location/View?r=2:172555858-172555866;db=core	2
(ggc)3	172885583	172885591	https://asia.ensembl.org/Homo_sapiens/Location/View?r=2:172885583-172885591;db=core	2
(gcc)3	173964417	173964425	https://asia.ensembl.org/Homo_sapiens/Location/View?r=2:173964417-173964425;db=core	2
(gcc)5	173964473	173964487	https://asia.ensembl.org/Homo_sapiens/Location/View?r=2:173964473-173964487;db=core	2
(ggc)4	173965231	173965242	https://asia.ensembl.org/Homo_sapiens/Location/View?r=2:173965231-173965242;db=core	2
(gcc)4	174336910	174336921	https://asia.ensembl.org/Homo_sapiens/Location/View?r=2:174336910-174336921;db=core	2
(gcc)3	174336949	174336957	https://asia.ensembl.org/Homo_sapiens/Location/View?r=2:174336949-174336957;db=core	2
(ggc)3	174337446	174337454	https://asia.ensembl.org/Homo_sapiens/Location/View?r=2:174337446-174337454;db=core	2
(GGC)3	174340571	174340579	https://asia.ensembl.org/Homo_sapiens/Location/View?r=2:174340571-174340579;db=core	2
(gcc)3	174719806	174719814	https://asia.ensembl.org/Homo_sapiens/Location/View?r=2:174719806-174719814;db=core	2
(GCC)3	174748247	174748255	https://asia.ensembl.org/Homo_sapiens/Location/View?r=2:174748247-174748255;db=core	2
(gcc)3	174806618	174806626	https://asia.ensembl.org/Homo_sapiens/Location/View?r=2:174806618-174806626;db=core	2
(ggc)6	175005263	175005280	https://asia.ensembl.org/Homo_sapiens/Location/View?r=2:175005263-175005280;db=core	2
(GGC)4	175181665	175181676	https://asia.ensembl.org/Homo_sapiens/Location/View?r=2:175181665-175181676;db=core	2
(GCC)3	176080338	176080346	https://asia.ensembl.org/Homo_sapiens/Location/View?r=2:176080338-176080346;db=core	2
(GCC)4	176080410	176080421	https://asia.ensembl.org/Homo_sapiens/Location/View?r=2:176080410-176080421;db=core	2
(gcc)4	176080647	176080658	https://asia.ensembl.org/Homo_sapiens/Location/View?r=2:176080647-176080658;db=core	2
(ggc)5	176092982	176092996	https://asia.ensembl.org/Homo_sapiens/Location/View?r=2:176092982-176092996;db=core	2
(ggc)5	176093057	176093071	https://asia.ensembl.org/Homo_sapiens/Location/View?r=2:176093057-176093071;db=core	2
(ggc)4	176107640	176107651	https://asia.ensembl.org/Homo_sapiens/Location/View?r=2:176107640-176107651;db=core	2
(GGC)3	176130070	176130078	https://asia.ensembl.org/Homo_sapiens/Location/View?r=2:176130070-176130078;db=core	2
(gcc)3	176130345	176130353	https://asia.ensembl.org/Homo_sapiens/Location/View?r=2:176130345-176130353;db=core	2
(ggc)3	176130407	176130415	https://asia.ensembl.org/Homo_sapiens/Location/View?r=2:176130407-176130415;db=core	2
(GCC)3	176172276	176172284	https://asia.ensembl.org/Homo_sapiens/Location/View?r=2:176172276-176172284;db=core	2
(GCC)3	176172385	176172393	https://asia.ensembl.org/Homo_sapiens/Location/View?r=2:176172385-176172393;db=core	2
(GCC)3	176178087	176178095	https://asia.ensembl.org/Homo_sapiens/Location/View?r=2:176178087-176178095;db=core	2
(GGC)3	176188509	176188517	https://asia.ensembl.org/Homo_sapiens/Location/View?r=2:176188509-176188517;db=core	2
(GCC)3	176188969	176188977	https://asia.ensembl.org/Homo_sapiens/Location/View?r=2:176188969-176188977;db=core	2
(GGC)3	176189224	176189232	https://asia.ensembl.org/Homo_sapiens/Location/View?r=2:176189224-176189232;db=core	2
(GGC)3	176645054	176645062	https://asia.ensembl.org/Homo_sapiens/Location/View?r=2:176645054-176645062;db=core	2
(GGC)3	177213250	177213258	https://asia.ensembl.org/Homo_sapiens/Location/View?r=2:177213250-177213258;db=core	2
(GCC)3	177213313	177213321	https://asia.ensembl.org/Homo_sapiens/Location/View?r=2:177213313-177213321;db=core	2
(ggc)5	177264662	177264676	https://asia.ensembl.org/Homo_sapiens/Location/View?r=2:177264662-177264676;db=core	2
(GGC)3	177392797	177392805	https://asia.ensembl.org/Homo_sapiens/Location/View?r=2:177392797-177392805;db=core	2
(GCC)4	178480621	178480632	https://asia.ensembl.org/Homo_sapiens/Location/View?r=2:178480621-178480632;db=core	2
(ggc)4	179264626	179264637	https://asia.ensembl.org/Homo_sapiens/Location/View?r=2:179264626-179264637;db=core	2
(ggc)5	180873431	180873445	https://asia.ensembl.org/Homo_sapiens/Location/View?r=2:180873431-180873445;db=core	2
(GGC)4	180980642	180980653	https://asia.ensembl.org/Homo_sapiens/Location/View?r=2:180980642-180980653;db=core	2
(GGC)4	180981014	180981025	https://asia.ensembl.org/Homo_sapiens/Location/View?r=2:180981014-180981025;db=core	2
(gcc)4	180981201	180981212	https://asia.ensembl.org/Homo_sapiens/Location/View?r=2:180981201-180981212;db=core	2
(GCC)3	181656878	181656886	https://asia.ensembl.org/Homo_sapiens/Location/View?r=2:181656878-181656886;db=core	2
(GCC)3	181891706	181891714	https://asia.ensembl.org/Homo_sapiens/Location/View?r=2:181891706-181891714;db=core	2
(GCC)3	181892009	181892017	https://asia.ensembl.org/Homo_sapiens/Location/View?r=2:181892009-181892017;db=core	2
(gcc)3	182386818	182386826	https://asia.ensembl.org/Homo_sapiens/Location/View?r=2:182386818-182386826;db=core	2
(GCC)5	183038111	183038125	https://asia.ensembl.org/Homo_sapiens/Location/View?r=2:183038111-183038125;db=core	2
(ggc)8	183038417	183038440	https://asia.ensembl.org/Homo_sapiens/Location/View?r=2:183038417-183038440;db=core	2
(gcc)4	184598563	184598574	https://asia.ensembl.org/Homo_sapiens/Location/View?r=2:184598563-184598574;db=core	2
(GGC)3	189674591	189674599	https://asia.ensembl.org/Homo_sapiens/Location/View?r=2:189674591-189674599;db=core	2
(GGC)3	190343700	190343708	https://asia.ensembl.org/Homo_sapiens/Location/View?r=2:190343700-190343708;db=core	2
(gcc)3	190408410	190408418	https://asia.ensembl.org/Homo_sapiens/Location/View?r=2:190408410-190408418;db=core	2
(gcc)3	190408431	190408439	https://asia.ensembl.org/Homo_sapiens/Location/View?r=2:190408431-190408439;db=core	2
(GCC)3	190408487	190408495	https://asia.ensembl.org/Homo_sapiens/Location/View?r=2:190408487-190408495;db=core	2
(GCC)4	190534569	190534580	https://asia.ensembl.org/Homo_sapiens/Location/View?r=2:190534569-190534580;db=core	2
(gcc)6	190649076	190649093	https://asia.ensembl.org/Homo_sapiens/Location/View?r=2:190649076-190649093;db=core	2
(gcc)5	190649115	190649129	https://asia.ensembl.org/Homo_sapiens/Location/View?r=2:190649115-190649129;db=core	2
(GCC)3	190649511	190649519	https://asia.ensembl.org/Homo_sapiens/Location/View?r=2:190649511-190649519;db=core	2
(ggc)3	192194628	192194636	https://asia.ensembl.org/Homo_sapiens/Location/View?r=2:192194628-192194636;db=core	2
(ggc)3	195751742	195751750	https://asia.ensembl.org/Homo_sapiens/Location/View?r=2:195751742-195751750;db=core	2
(gcc)6	196926631	196926648	https://asia.ensembl.org/Homo_sapiens/Location/View?r=2:196926631-196926648;db=core	2
(gcc)3	197310971	197310979	https://asia.ensembl.org/Homo_sapiens/Location/View?r=2:197310971-197310979;db=core	2
(GGC)3	197378817	197378825	https://asia.ensembl.org/Homo_sapiens/Location/View?r=2:197378817-197378825;db=core	2
(GGC)3	197499344	197499352	https://asia.ensembl.org/Homo_sapiens/Location/View?r=2:197499344-197499352;db=core	2
(GGC)3	197499787	197499795	https://asia.ensembl.org/Homo_sapiens/Location/View?r=2:197499787-197499795;db=core	2
(gcc)5	197804606	197804620	https://asia.ensembl.org/Homo_sapiens/Location/View?r=2:197804606-197804620;db=core	2
(gcc)8	197804942	197804965	https://asia.ensembl.org/Homo_sapiens/Location/View?r=2:197804942-197804965;db=core	2
(ggc)6	199457726	199457743	https://asia.ensembl.org/Homo_sapiens/Location/View?r=2:199457726-199457743;db=core	2
(GGC)3	199458600	199458608	https://asia.ensembl.org/Homo_sapiens/Location/View?r=2:199458600-199458608;db=core	2
(GCC)3	199659351	199659359	https://asia.ensembl.org/Homo_sapiens/Location/View?r=2:199659351-199659359;db=core	2
(GGC)3	199911659	199911667	https://asia.ensembl.org/Homo_sapiens/Location/View?r=2:199911659-199911667;db=core	2
(GCC)3	199911725	199911733	https://asia.ensembl.org/Homo_sapiens/Location/View?r=2:199911725-199911733;db=core	2
(ggc)3	200599836	200599844	https://asia.ensembl.org/Homo_sapiens/Location/View?r=2:200599836-200599844;db=core	2
(gcc)3	200812367	200812375	https://asia.ensembl.org/Homo_sapiens/Location/View?r=2:200812367-200812375;db=core	2
(GCC)3	201117108	201117116	https://asia.ensembl.org/Homo_sapiens/Location/View?r=2:201117108-201117116;db=core	2
(ggc)8	202033878	202033901	https://asia.ensembl.org/Homo_sapiens/Location/View?r=2:202033878-202033901;db=core	2
(ggc)3	202034187	202034195	https://asia.ensembl.org/Homo_sapiens/Location/View?r=2:202034187-202034195;db=core	2
(GGC)3	202034448	202034456	https://asia.ensembl.org/Homo_sapiens/Location/View?r=2:202034448-202034456;db=core	2
(GGC)3	202035163	202035171	https://asia.ensembl.org/Homo_sapiens/Location/View?r=2:202035163-202035171;db=core	2
(ggc)3	202376265	202376273	https://asia.ensembl.org/Homo_sapiens/Location/View?r=2:202376265-202376273;db=core	2
(ggc)12	202376511	202376546	https://asia.ensembl.org/Homo_sapiens/Location/View?r=2:202376511-202376546;db=core	2
(ggc)5	202635418	202635432	https://asia.ensembl.org/Homo_sapiens/Location/View?r=2:202635418-202635432;db=core	2
(gcc)6	202635603	202635620	https://asia.ensembl.org/Homo_sapiens/Location/View?r=2:202635603-202635620;db=core	2
(GGC)3	203014955	203014963	https://asia.ensembl.org/Homo_sapiens/Location/View?r=2:203014955-203014963;db=core	2
(ggc)3	203535303	203535311	https://asia.ensembl.org/Homo_sapiens/Location/View?r=2:203535303-203535311;db=core	2
(GCC)3	203683578	203683586	https://asia.ensembl.org/Homo_sapiens/Location/View?r=2:203683578-203683586;db=core	2
(GCC)4	205685465	205685476	https://asia.ensembl.org/Homo_sapiens/Location/View?r=2:205685465-205685476;db=core	2
(GCC)3	207530635	207530643	https://asia.ensembl.org/Homo_sapiens/Location/View?r=2:207530635-207530643;db=core	2
(GGC)3	207681537	207681545	https://asia.ensembl.org/Homo_sapiens/Location/View?r=2:207681537-207681545;db=core	2
(GGC)3	207711522	207711530	https://asia.ensembl.org/Homo_sapiens/Location/View?r=2:207711522-207711530;db=core	2
(GGC)3	207711661	207711669	https://asia.ensembl.org/Homo_sapiens/Location/View?r=2:207711661-207711669;db=core	2
(GGC)3	208124508	208124516	https://asia.ensembl.org/Homo_sapiens/Location/View?r=2:208124508-208124516;db=core	2
(GGC)3	208255465	208255473	https://asia.ensembl.org/Homo_sapiens/Location/View?r=2:208255465-208255473;db=core	2
(ggc)3	208377479	208377487	https://asia.ensembl.org/Homo_sapiens/Location/View?r=2:208377479-208377487;db=core	2
(GGC)5	209772005	209772019	https://asia.ensembl.org/Homo_sapiens/Location/View?r=2:209772005-209772019;db=core	2
(gcc)4	209772237	209772248	https://asia.ensembl.org/Homo_sapiens/Location/View?r=2:209772237-209772248;db=core	2
(gcc)15	210171295	210171339	https://asia.ensembl.org/Homo_sapiens/Location/View?r=2:210171295-210171339;db=core	2
(GGC)4	210476472	210476483	https://asia.ensembl.org/Homo_sapiens/Location/View?r=2:210476472-210476483;db=core	2
(ggc)7	212537132	212537152	https://asia.ensembl.org/Homo_sapiens/Location/View?r=2:212537132-212537152;db=core	2
(ggc)3	213151715	213151723	https://asia.ensembl.org/Homo_sapiens/Location/View?r=2:213151715-213151723;db=core	2
(GGC)3	215312224	215312232	https://asia.ensembl.org/Homo_sapiens/Location/View?r=2:215312224-215312232;db=core	2
(gcc)4	216633558	216633569	https://asia.ensembl.org/Homo_sapiens/Location/View?r=2:216633558-216633569;db=core	2
(ggc)4	216633607	216633618	https://asia.ensembl.org/Homo_sapiens/Location/View?r=2:216633607-216633618;db=core	2
(GCC)3	217604699	217604707	https://asia.ensembl.org/Homo_sapiens/Location/View?r=2:217604699-217604707;db=core	2
(ggc)5	218010690	218010704	https://asia.ensembl.org/Homo_sapiens/Location/View?r=2:218010690-218010704;db=core	2
(GGC)3	218217007	218217015	https://asia.ensembl.org/Homo_sapiens/Location/View?r=2:218217007-218217015;db=core	2
(ggc)6	218217205	218217222	https://asia.ensembl.org/Homo_sapiens/Location/View?r=2:218217205-218217222;db=core	2
(GCC)3	218217461	218217469	https://asia.ensembl.org/Homo_sapiens/Location/View?r=2:218217461-218217469;db=core	2
(ggc)3	218348875	218348883	https://asia.ensembl.org/Homo_sapiens/Location/View?r=2:218348875-218348883;db=core	2
(gcc)5	218400234	218400248	https://asia.ensembl.org/Homo_sapiens/Location/View?r=2:218400234-218400248;db=core	2
(GCC)3	218404518	218404526	https://asia.ensembl.org/Homo_sapiens/Location/View?r=2:218404518-218404526;db=core	2
(GCC)3	218859900	218859908	https://asia.ensembl.org/Homo_sapiens/Location/View?r=2:218859900-218859908;db=core	2
(GCC)3	218859926	218859934	https://asia.ensembl.org/Homo_sapiens/Location/View?r=2:218859926-218859934;db=core	2
(GGC)3	218878095	218878103	https://asia.ensembl.org/Homo_sapiens/Location/View?r=2:218878095-218878103;db=core	2
(GGC)3	218898419	218898427	https://asia.ensembl.org/Homo_sapiens/Location/View?r=2:218898419-218898427;db=core	2
(GCC)3	218960810	218960818	https://asia.ensembl.org/Homo_sapiens/Location/View?r=2:218960810-218960818;db=core	2
(GGC)3	218981762	218981770	https://asia.ensembl.org/Homo_sapiens/Location/View?r=2:218981762-218981770;db=core	2
(GGC)3	218981967	218981975	https://asia.ensembl.org/Homo_sapiens/Location/View?r=2:218981967-218981975;db=core	2
(ggc)3	219001579	219001587	https://asia.ensembl.org/Homo_sapiens/Location/View?r=2:219001579-219001587;db=core	2
(ggc)3	219178331	219178339	https://asia.ensembl.org/Homo_sapiens/Location/View?r=2:219178331-219178339;db=core	2
(ggc)3	219178552	219178560	https://asia.ensembl.org/Homo_sapiens/Location/View?r=2:219178552-219178560;db=core	2
(GGC)3	219331781	219331789	https://asia.ensembl.org/Homo_sapiens/Location/View?r=2:219331781-219331789;db=core	2
(GCC)3	219388590	219388598	https://asia.ensembl.org/Homo_sapiens/Location/View?r=2:219388590-219388598;db=core	2
(GGC)3	219570355	219570363	https://asia.ensembl.org/Homo_sapiens/Location/View?r=2:219570355-219570363;db=core	2
(GGC)3	219571110	219571118	https://asia.ensembl.org/Homo_sapiens/Location/View?r=2:219571110-219571118;db=core	2
(ggc)3	219751059	219751067	https://asia.ensembl.org/Homo_sapiens/Location/View?r=2:219751059-219751067;db=core	2
(GCC)3	221104533	221104541	https://asia.ensembl.org/Homo_sapiens/Location/View?r=2:221104533-221104541;db=core	2
(GGC)3	221574214	221574222	https://asia.ensembl.org/Homo_sapiens/Location/View?r=2:221574214-221574222;db=core	2
(GGC)3	222295708	222295716	https://asia.ensembl.org/Homo_sapiens/Location/View?r=2:222295708-222295716;db=core	2
(gcc)5	222319075	222319089	https://asia.ensembl.org/Homo_sapiens/Location/View?r=2:222319075-222319089;db=core	2
(ggc)6	222319466	222319483	https://asia.ensembl.org/Homo_sapiens/Location/View?r=2:222319466-222319483;db=core	2
(GGC)3	222861172	222861180	https://asia.ensembl.org/Homo_sapiens/Location/View?r=2:222861172-222861180;db=core	2
(gcc)3	222961922	222961930	https://asia.ensembl.org/Homo_sapiens/Location/View?r=2:222961922-222961930;db=core	2
(GGC)3	223148355	223148363	https://asia.ensembl.org/Homo_sapiens/Location/View?r=2:223148355-223148363;db=core	2
(GCC)3	223837459	223837467	https://asia.ensembl.org/Homo_sapiens/Location/View?r=2:223837459-223837467;db=core	2
(GGC)4	224585104	224585115	https://asia.ensembl.org/Homo_sapiens/Location/View?r=2:224585104-224585115;db=core	2
(ggc)8	224585176	224585199	https://asia.ensembl.org/Homo_sapiens/Location/View?r=2:224585176-224585199;db=core	2
(ggc)5	224585307	224585321	https://asia.ensembl.org/Homo_sapiens/Location/View?r=2:224585307-224585321;db=core	2
(ggc)3	225553156	225553164	https://asia.ensembl.org/Homo_sapiens/Location/View?r=2:225553156-225553164;db=core	2
(GCC)4	226799033	226799044	https://asia.ensembl.org/Homo_sapiens/Location/View?r=2:226799033-226799044;db=core	2
(GCC)3	226799814	226799822	https://asia.ensembl.org/Homo_sapiens/Location/View?r=2:226799814-226799822;db=core	2
(ggc)3	227164788	227164796	https://asia.ensembl.org/Homo_sapiens/Location/View?r=2:227164788-227164796;db=core	2
(GGC)3	227460215	227460223	https://asia.ensembl.org/Homo_sapiens/Location/View?r=2:227460215-227460223;db=core	2
(ggc)5	227472179	227472193	https://asia.ensembl.org/Homo_sapiens/Location/View?r=2:227472179-227472193;db=core	2
(GGC)3	227472321	227472329	https://asia.ensembl.org/Homo_sapiens/Location/View?r=2:227472321-227472329;db=core	2
(GCC)3	227472915	227472923	https://asia.ensembl.org/Homo_sapiens/Location/View?r=2:227472915-227472923;db=core	2
(gcc)3	227859820	227859828	https://asia.ensembl.org/Homo_sapiens/Location/View?r=2:227859820-227859828;db=core	2
(GGC)4	228181719	228181730	https://asia.ensembl.org/Homo_sapiens/Location/View?r=2:228181719-228181730;db=core	2
(ggc)3	229271316	229271324	https://asia.ensembl.org/Homo_sapiens/Location/View?r=2:229271316-229271324;db=core	2
(ggc)3	229652908	229652916	https://asia.ensembl.org/Homo_sapiens/Location/View?r=2:229652908-229652916;db=core	2
(gcc)4	230713056	230713067	https://asia.ensembl.org/Homo_sapiens/Location/View?r=2:230713056-230713067;db=core	2
(GGC)3	230713336	230713344	https://asia.ensembl.org/Homo_sapiens/Location/View?r=2:230713336-230713344;db=core	2
(GGC)3	230828683	230828691	https://asia.ensembl.org/Homo_sapiens/Location/View?r=2:230828683-230828691;db=core	2
(GGC)3	230829109	230829117	https://asia.ensembl.org/Homo_sapiens/Location/View?r=2:230829109-230829117;db=core	2
(GGC)3	231037552	231037560	https://asia.ensembl.org/Homo_sapiens/Location/View?r=2:231037552-231037560;db=core	2
(ggc)6	231037843	231037860	https://asia.ensembl.org/Homo_sapiens/Location/View?r=2:231037843-231037860;db=core	2
(GCC)3	231057077	231057085	https://asia.ensembl.org/Homo_sapiens/Location/View?r=2:231057077-231057085;db=core	2
(ggc)3	231126294	231126302	https://asia.ensembl.org/Homo_sapiens/Location/View?r=2:231126294-231126302;db=core	2
(ggc)3	231198617	231198625	https://asia.ensembl.org/Homo_sapiens/Location/View?r=2:231198617-231198625;db=core	2
(GGC)3	231395591	231395599	https://asia.ensembl.org/Homo_sapiens/Location/View?r=2:231395591-231395599;db=core	2
(GGC)3	231681062	231681070	https://asia.ensembl.org/Homo_sapiens/Location/View?r=2:231681062-231681070;db=core	2
(gcc)3	231747915	231747923	https://asia.ensembl.org/Homo_sapiens/Location/View?r=2:231747915-231747923;db=core	2
(gcc)3	231969023	231969031	https://asia.ensembl.org/Homo_sapiens/Location/View?r=2:231969023-231969031;db=core	2
(gcc)3	232420944	232420952	https://asia.ensembl.org/Homo_sapiens/Location/View?r=2:232420944-232420952;db=core	2
(ggc)4	232487652	232487663	https://asia.ensembl.org/Homo_sapiens/Location/View?r=2:232487652-232487663;db=core	2
(GCC)3	232515286	232515294	https://asia.ensembl.org/Homo_sapiens/Location/View?r=2:232515286-232515294;db=core	2
(GGC)3	232522270	232522278	https://asia.ensembl.org/Homo_sapiens/Location/View?r=2:232522270-232522278;db=core	2
(GCC)3	232633966	232633974	https://asia.ensembl.org/Homo_sapiens/Location/View?r=2:232633966-232633974;db=core	2
(gcc)4	232928124	232928135	https://asia.ensembl.org/Homo_sapiens/Location/View?r=2:232928124-232928135;db=core	2
(GGC)3	232928240	232928248	https://asia.ensembl.org/Homo_sapiens/Location/View?r=2:232928240-232928248;db=core	2
(GCC)3	233034711	233034719	https://asia.ensembl.org/Homo_sapiens/Location/View?r=2:233034711-233034719;db=core	2
(GCC)3	233337684	233337692	https://asia.ensembl.org/Homo_sapiens/Location/View?r=2:233337684-233337692;db=core	2
(ggc)4	233354520	233354531	https://asia.ensembl.org/Homo_sapiens/Location/View?r=2:233354520-233354531;db=core	2
(GCC)3	233466559	233466567	https://asia.ensembl.org/Homo_sapiens/Location/View?r=2:233466559-233466567;db=core	2
(ggc)3	234952177	234952185	https://asia.ensembl.org/Homo_sapiens/Location/View?r=2:234952177-234952185;db=core	2
(GGC)4	235494639	235494650	https://asia.ensembl.org/Homo_sapiens/Location/View?r=2:235494639-235494650;db=core	2
(GGC)3	235670851	235670859	https://asia.ensembl.org/Homo_sapiens/Location/View?r=2:235670851-235670859;db=core	2
(ggc)8	236167783	236167806	https://asia.ensembl.org/Homo_sapiens/Location/View?r=2:236167783-236167806;db=core	2
(GCC)3	236168019	236168027	https://asia.ensembl.org/Homo_sapiens/Location/View?r=2:236168019-236168027;db=core	2
(GCC)3	236171580	236171588	https://asia.ensembl.org/Homo_sapiens/Location/View?r=2:236171580-236171588;db=core	2
(GGC)3	236634013	236634021	https://asia.ensembl.org/Homo_sapiens/Location/View?r=2:236634013-236634021;db=core	2
(GCC)3	237859546	237859554	https://asia.ensembl.org/Homo_sapiens/Location/View?r=2:237859546-237859554;db=core	2
(GCC)3	238104803	238104811	https://asia.ensembl.org/Homo_sapiens/Location/View?r=2:238104803-238104811;db=core	2
(gcc)4	238159067	238159078	https://asia.ensembl.org/Homo_sapiens/Location/View?r=2:238159067-238159078;db=core	2
(GCC)3	238159135	238159143	https://asia.ensembl.org/Homo_sapiens/Location/View?r=2:238159135-238159143;db=core	2
(GGC)3	238172566	238172574	https://asia.ensembl.org/Homo_sapiens/Location/View?r=2:238172566-238172574;db=core	2
(ggc)5	238320561	238320575	https://asia.ensembl.org/Homo_sapiens/Location/View?r=2:238320561-238320575;db=core	2
(GGC)3	239239893	239239901	https://asia.ensembl.org/Homo_sapiens/Location/View?r=2:239239893-239239901;db=core	2
(GGC)3	239302235	239302243	https://asia.ensembl.org/Homo_sapiens/Location/View?r=2:239302235-239302243;db=core	2
(GGC)4	239400698	239400709	https://asia.ensembl.org/Homo_sapiens/Location/View?r=2:239400698-239400709;db=core	2
(GGC)6	239400852	239400869	https://asia.ensembl.org/Homo_sapiens/Location/View?r=2:239400852-239400869;db=core	2
(GGC)3	239400903	239400911	https://asia.ensembl.org/Homo_sapiens/Location/View?r=2:239400903-239400911;db=core	2
(GCC)3	240025128	240025136	https://asia.ensembl.org/Homo_sapiens/Location/View?r=2:240025128-240025136;db=core	2
(GGC)3	240412370	240412378	https://asia.ensembl.org/Homo_sapiens/Location/View?r=2:240412370-240412378;db=core	2
(GGC)3	240435123	240435131	https://asia.ensembl.org/Homo_sapiens/Location/View?r=2:240435123-240435131;db=core	2
(gcc)4	240435782	240435793	https://asia.ensembl.org/Homo_sapiens/Location/View?r=2:240435782-240435793;db=core	2
(GCC)3	240443123	240443131	https://asia.ensembl.org/Homo_sapiens/Location/View?r=2:240443123-240443131;db=core	2
(GCC)3	240453466	240453474	https://asia.ensembl.org/Homo_sapiens/Location/View?r=2:240453466-240453474;db=core	2
(gcc)3	240460627	240460635	https://asia.ensembl.org/Homo_sapiens/Location/View?r=2:240460627-240460635;db=core	2
(GCC)3	240568550	240568558	https://asia.ensembl.org/Homo_sapiens/Location/View?r=2:240568550-240568558;db=core	2
(gcc)3	240568654	240568662	https://asia.ensembl.org/Homo_sapiens/Location/View?r=2:240568654-240568662;db=core	2
(ggc)4	240586829	240586840	https://asia.ensembl.org/Homo_sapiens/Location/View?r=2:240586829-240586840;db=core	2
(GGC)3	240681033	240681041	https://asia.ensembl.org/Homo_sapiens/Location/View?r=2:240681033-240681041;db=core	2
(GCC)3	240693709	240693717	https://asia.ensembl.org/Homo_sapiens/Location/View?r=2:240693709-240693717;db=core	2
(GGC)3	240701714	240701722	https://asia.ensembl.org/Homo_sapiens/Location/View?r=2:240701714-240701722;db=core	2
(GGC)3	240820136	240820144	https://asia.ensembl.org/Homo_sapiens/Location/View?r=2:240820136-240820144;db=core	2
(GGC)3	240892526	240892534	https://asia.ensembl.org/Homo_sapiens/Location/View?r=2:240892526-240892534;db=core	2
(gcc)3	241102499	241102507	https://asia.ensembl.org/Homo_sapiens/Location/View?r=2:241102499-241102507;db=core	2
(GGC)3	241150563	241150571	https://asia.ensembl.org/Homo_sapiens/Location/View?r=2:241150563-241150571;db=core	2
(GCC)3	241150649	241150657	https://asia.ensembl.org/Homo_sapiens/Location/View?r=2:241150649-241150657;db=core	2
(GGC)3	241272865	241272873	https://asia.ensembl.org/Homo_sapiens/Location/View?r=2:241272865-241272873;db=core	2
(GCC)3	241500754	241500762	https://asia.ensembl.org/Homo_sapiens/Location/View?r=2:241500754-241500762;db=core	2
(GGC)3	241725487	241725495	https://asia.ensembl.org/Homo_sapiens/Location/View?r=2:241725487-241725495;db=core	2
(GGC)3	241814765	241814773	https://asia.ensembl.org/Homo_sapiens/Location/View?r=2:241814765-241814773;db=core	2
(GCC)3	241901196	241901204	https://asia.ensembl.org/Homo_sapiens/Location/View?r=2:241901196-241901204;db=core	2
(GGC)3	3799549	3799557	https://asia.ensembl.org/Homo_sapiens/Location/View?r=3:3799549-3799557;db=core	3
(GCC)3	4753352	4753360	https://asia.ensembl.org/Homo_sapiens/Location/View?r=3:4753352-4753360;db=core	3
(GGC)3	4796465	4796473	https://asia.ensembl.org/Homo_sapiens/Location/View?r=3:4796465-4796473;db=core	3
(GGC)4	6861471	6861482	https://asia.ensembl.org/Homo_sapiens/Location/View?r=3:6861471-6861482;db=core	3
(GGC)4	6861471	6861482	https://asia.ensembl.org/Homo_sapiens/Location/View?r=3:6861471-6861482;db=core	3
(GGC)3	8736669	8736677	https://asia.ensembl.org/Homo_sapiens/Location/View?r=3:8736669-8736677;db=core	3
(gcc)3	8767465	8767473	https://asia.ensembl.org/Homo_sapiens/Location/View?r=3:8767465-8767473;db=core	3
(GCC)3	9396618	9396626	https://asia.ensembl.org/Homo_sapiens/Location/View?r=3:9396618-9396626;db=core	3
(gcc)11	9397651	9397683	https://asia.ensembl.org/Homo_sapiens/Location/View?r=3:9397651-9397683;db=core	3
(GGC)3	9553771	9553779	https://asia.ensembl.org/Homo_sapiens/Location/View?r=3:9553771-9553779;db=core	3
(GGC)3	9603830	9603838	https://asia.ensembl.org/Homo_sapiens/Location/View?r=3:9603830-9603838;db=core	3
(gcc)4	9649598	9649609	https://asia.ensembl.org/Homo_sapiens/Location/View?r=3:9649598-9649609;db=core	3
(gcc)5	9703882	9703896	https://asia.ensembl.org/Homo_sapiens/Location/View?r=3:9703882-9703896;db=core	3
(GGC)3	9731895	9731903	https://asia.ensembl.org/Homo_sapiens/Location/View?r=3:9731895-9731903;db=core	3
(GGC)3	10115691	10115699	https://asia.ensembl.org/Homo_sapiens/Location/View?r=3:10115691-10115699;db=core	3
(GCC)3	10165263	10165271	https://asia.ensembl.org/Homo_sapiens/Location/View?r=3:10165263-10165271;db=core	3
(GCC)3	10552149	10552157	https://asia.ensembl.org/Homo_sapiens/Location/View?r=3:10552149-10552157;db=core	3
(gcc)3	10707941	10707949	https://asia.ensembl.org/Homo_sapiens/Location/View?r=3:10707941-10707949;db=core	3
(gcc)3	10707953	10707961	https://asia.ensembl.org/Homo_sapiens/Location/View?r=3:10707953-10707961;db=core	3
(GCC)3	10764432	10764440	https://asia.ensembl.org/Homo_sapiens/Location/View?r=3:10764432-10764440;db=core	3
(GGC)3	10816218	10816226	https://asia.ensembl.org/Homo_sapiens/Location/View?r=3:10816218-10816226;db=core	3
(GGC)3	11183604	11183612	https://asia.ensembl.org/Homo_sapiens/Location/View?r=3:11183604-11183612;db=core	3
(GCC)3	12004444	12004452	https://asia.ensembl.org/Homo_sapiens/Location/View?r=3:12004444-12004452;db=core	3
(gcc)6	12004649	12004666	https://asia.ensembl.org/Homo_sapiens/Location/View?r=3:12004649-12004666;db=core	3
(gcc)3	12004733	12004741	https://asia.ensembl.org/Homo_sapiens/Location/View?r=3:12004733-12004741;db=core	3
(GGC)3	12287746	12287754	https://asia.ensembl.org/Homo_sapiens/Location/View?r=3:12287746-12287754;db=core	3
(GCC)3	12287950	12287958	https://asia.ensembl.org/Homo_sapiens/Location/View?r=3:12287950-12287958;db=core	3
(GGC)3	12557113	12557121	https://asia.ensembl.org/Homo_sapiens/Location/View?r=3:12557113-12557121;db=core	3
(GGC)4	13283029	13283040	https://asia.ensembl.org/Homo_sapiens/Location/View?r=3:13283029-13283040;db=core	3
(GGC)3	13421350	13421358	https://asia.ensembl.org/Homo_sapiens/Location/View?r=3:13421350-13421358;db=core	3
(GGC)3	13570661	13570669	https://asia.ensembl.org/Homo_sapiens/Location/View?r=3:13570661-13570669;db=core	3
(GCC)3	13655320	13655328	https://asia.ensembl.org/Homo_sapiens/Location/View?r=3:13655320-13655328;db=core	3
(GCC)3	13933043	13933051	https://asia.ensembl.org/Homo_sapiens/Location/View?r=3:13933043-13933051;db=core	3
(GGC)3	14125166	14125174	https://asia.ensembl.org/Homo_sapiens/Location/View?r=3:14125166-14125174;db=core	3
(gcc)3	14810595	14810603	https://asia.ensembl.org/Homo_sapiens/Location/View?r=3:14810595-14810603;db=core	3
(GCC)4	14947435	14947446	https://asia.ensembl.org/Homo_sapiens/Location/View?r=3:14947435-14947446;db=core	3
(ggc)6	14947612	14947629	https://asia.ensembl.org/Homo_sapiens/Location/View?r=3:14947612-14947629;db=core	3
(ggc)3	14947985	14947993	https://asia.ensembl.org/Homo_sapiens/Location/View?r=3:14947985-14947993;db=core	3
(GGC)4	14948026	14948037	https://asia.ensembl.org/Homo_sapiens/Location/View?r=3:14948026-14948037;db=core	3
(gcc)3	15859455	15859463	https://asia.ensembl.org/Homo_sapiens/Location/View?r=3:15859455-15859463;db=core	3
(gcc)4	15859713	15859724	https://asia.ensembl.org/Homo_sapiens/Location/View?r=3:15859713-15859724;db=core	3
(GGC)3	16884930	16884938	https://asia.ensembl.org/Homo_sapiens/Location/View?r=3:16884930-16884938;db=core	3
(GGC)3	16884976	16884984	https://asia.ensembl.org/Homo_sapiens/Location/View?r=3:16884976-16884984;db=core	3
(GGC)3	17706081	17706089	https://asia.ensembl.org/Homo_sapiens/Location/View?r=3:17706081-17706089;db=core	3
(GGC)3	17706224	17706232	https://asia.ensembl.org/Homo_sapiens/Location/View?r=3:17706224-17706232;db=core	3
(ggc)3	17742278	17742286	https://asia.ensembl.org/Homo_sapiens/Location/View?r=3:17742278-17742286;db=core	3
(ggc)4	17742310	17742321	https://asia.ensembl.org/Homo_sapiens/Location/View?r=3:17742310-17742321;db=core	3
(gcc)3	18425073	18425081	https://asia.ensembl.org/Homo_sapiens/Location/View?r=3:18425073-18425081;db=core	3
(ggc)7	18425339	18425359	https://asia.ensembl.org/Homo_sapiens/Location/View?r=3:18425339-18425359;db=core	3
(GCC)3	18425689	18425697	https://asia.ensembl.org/Homo_sapiens/Location/View?r=3:18425689-18425697;db=core	3
(GGC)3	18444701	18444709	https://asia.ensembl.org/Homo_sapiens/Location/View?r=3:18444701-18444709;db=core	3
(gcc)6	18444723	18444740	https://asia.ensembl.org/Homo_sapiens/Location/View?r=3:18444723-18444740;db=core	3
(ggc)3	18444930	18444938	https://asia.ensembl.org/Homo_sapiens/Location/View?r=3:18444930-18444938;db=core	3
(gcc)6	18445288	18445305	https://asia.ensembl.org/Homo_sapiens/Location/View?r=3:18445288-18445305;db=core	3
(GGC)3	20008143	20008151	https://asia.ensembl.org/Homo_sapiens/Location/View?r=3:20008143-20008151;db=core	3
(ggc)4	20040190	20040201	https://asia.ensembl.org/Homo_sapiens/Location/View?r=3:20040190-20040201;db=core	3
(gcc)4	20040256	20040267	https://asia.ensembl.org/Homo_sapiens/Location/View?r=3:20040256-20040267;db=core	3
(GGC)5	20040423	20040437	https://asia.ensembl.org/Homo_sapiens/Location/View?r=3:20040423-20040437;db=core	3
(GGC)4	23203130	23203141	https://asia.ensembl.org/Homo_sapiens/Location/View?r=3:23203130-23203141;db=core	3
(GGC)3	23203237	23203245	https://asia.ensembl.org/Homo_sapiens/Location/View?r=3:23203237-23203245;db=core	3
(GCC)3	23945380	23945388	https://asia.ensembl.org/Homo_sapiens/Location/View?r=3:23945380-23945388;db=core	3
(ggc)5	23945511	23945525	https://asia.ensembl.org/Homo_sapiens/Location/View?r=3:23945511-23945525;db=core	3
(GGC)4	23945944	23945955	https://asia.ensembl.org/Homo_sapiens/Location/View?r=3:23945944-23945955;db=core	3
(gcc)3	24020553	24020561	https://asia.ensembl.org/Homo_sapiens/Location/View?r=3:24020553-24020561;db=core	3
(ggc)4	24495225	24495236	https://asia.ensembl.org/Homo_sapiens/Location/View?r=3:24495225-24495236;db=core	3
(gcc)3	24829169	24829177	https://asia.ensembl.org/Homo_sapiens/Location/View?r=3:24829169-24829177;db=core	3
(GCC)3	25664249	25664257	https://asia.ensembl.org/Homo_sapiens/Location/View?r=3:25664249-25664257;db=core	3
(gcc)6	25664849	25664866	https://asia.ensembl.org/Homo_sapiens/Location/View?r=3:25664849-25664866;db=core	3
(GCC)4	25686862	25686873	https://asia.ensembl.org/Homo_sapiens/Location/View?r=3:25686862-25686873;db=core	3
(GCC)4	25783376	25783387	https://asia.ensembl.org/Homo_sapiens/Location/View?r=3:25783376-25783387;db=core	3
(gcc)4	27484199	27484210	https://asia.ensembl.org/Homo_sapiens/Location/View?r=3:27484199-27484210;db=core	3
(gcc)3	27721613	27721621	https://asia.ensembl.org/Homo_sapiens/Location/View?r=3:27721613-27721621;db=core	3
(GCC)3	27721788	27721796	https://asia.ensembl.org/Homo_sapiens/Location/View?r=3:27721788-27721796;db=core	3
(gcc)3	28576387	28576395	https://asia.ensembl.org/Homo_sapiens/Location/View?r=3:28576387-28576395;db=core	3
(gcc)3	29482989	29482997	https://asia.ensembl.org/Homo_sapiens/Location/View?r=3:29482989-29482997;db=core	3
(GGC)4	31532950	31532961	https://asia.ensembl.org/Homo_sapiens/Location/View?r=3:31532950-31532961;db=core	3
(gcc)3	31981039	31981047	https://asia.ensembl.org/Homo_sapiens/Location/View?r=3:31981039-31981047;db=core	3
(GCC)3	32106619	32106627	https://asia.ensembl.org/Homo_sapiens/Location/View?r=3:32106619-32106627;db=core	3
(GGC)3	32238143	32238151	https://asia.ensembl.org/Homo_sapiens/Location/View?r=3:32238143-32238151;db=core	3
(GGC)3	32239375	32239383	https://asia.ensembl.org/Homo_sapiens/Location/View?r=3:32239375-32239383;db=core	3
(GGC)3	32392454	32392462	https://asia.ensembl.org/Homo_sapiens/Location/View?r=3:32392454-32392462;db=core	3
(GCC)3	32401699	32401707	https://asia.ensembl.org/Homo_sapiens/Location/View?r=3:32401699-32401707;db=core	3
(ggc)3	32818229	32818237	https://asia.ensembl.org/Homo_sapiens/Location/View?r=3:32818229-32818237;db=core	3
(GCC)3	32818466	32818474	https://asia.ensembl.org/Homo_sapiens/Location/View?r=3:32818466-32818474;db=core	3
(GCC)3	33218729	33218737	https://asia.ensembl.org/Homo_sapiens/Location/View?r=3:33218729-33218737;db=core	3
(gcc)3	33440144	33440152	https://asia.ensembl.org/Homo_sapiens/Location/View?r=3:33440144-33440152;db=core	3
(gcc)3	35640126	35640134	https://asia.ensembl.org/Homo_sapiens/Location/View?r=3:35640126-35640134;db=core	3
(ggc)4	36764225	36764236	https://asia.ensembl.org/Homo_sapiens/Location/View?r=3:36764225-36764236;db=core	3
(gcc)4	37452060	37452071	https://asia.ensembl.org/Homo_sapiens/Location/View?r=3:37452060-37452071;db=core	3
(GGC)3	37452356	37452364	https://asia.ensembl.org/Homo_sapiens/Location/View?r=3:37452356-37452364;db=core	3
(GCC)3	37526650	37526658	https://asia.ensembl.org/Homo_sapiens/Location/View?r=3:37526650-37526658;db=core	3
(GGC)3	37861985	37861993	https://asia.ensembl.org/Homo_sapiens/Location/View?r=3:37861985-37861993;db=core	3
(GCC)3	38029863	38029871	https://asia.ensembl.org/Homo_sapiens/Location/View?r=3:38029863-38029871;db=core	3
(GCC)3	38454237	38454245	https://asia.ensembl.org/Homo_sapiens/Location/View?r=3:38454237-38454245;db=core	3
(GGC)3	38649465	38649473	https://asia.ensembl.org/Homo_sapiens/Location/View?r=3:38649465-38649473;db=core	3
(GCC)4	39180911	39180922	https://asia.ensembl.org/Homo_sapiens/Location/View?r=3:39180911-39180922;db=core	3
(GGC)3	39384227	39384235	https://asia.ensembl.org/Homo_sapiens/Location/View?r=3:39384227-39384235;db=core	3
(GCC)3	41198988	41198996	https://asia.ensembl.org/Homo_sapiens/Location/View?r=3:41198988-41198996;db=core	3
(GGC)3	41199847	41199855	https://asia.ensembl.org/Homo_sapiens/Location/View?r=3:41199847-41199855;db=core	3
(gcc)3	41548802	41548810	https://asia.ensembl.org/Homo_sapiens/Location/View?r=3:41548802-41548810;db=core	3
(GCC)3	42013740	42013748	https://asia.ensembl.org/Homo_sapiens/Location/View?r=3:42013740-42013748;db=core	3
(GGC)3	42013937	42013945	https://asia.ensembl.org/Homo_sapiens/Location/View?r=3:42013937-42013945;db=core	3
(GCC)3	42528353	42528361	https://asia.ensembl.org/Homo_sapiens/Location/View?r=3:42528353-42528361;db=core	3
(GGC)4	42979787	42979798	https://asia.ensembl.org/Homo_sapiens/Location/View?r=3:42979787-42979798;db=core	3
(ggc)3	43286906	43286914	https://asia.ensembl.org/Homo_sapiens/Location/View?r=3:43286906-43286914;db=core	3
(GCC)3	44338531	44338539	https://asia.ensembl.org/Homo_sapiens/Location/View?r=3:44338531-44338539;db=core	3
(GCC)3	44581098	44581106	https://asia.ensembl.org/Homo_sapiens/Location/View?r=3:44581098-44581106;db=core	3
(GCC)3	44862080	44862088	https://asia.ensembl.org/Homo_sapiens/Location/View?r=3:44862080-44862088;db=core	3
(GGC)3	44976134	44976142	https://asia.ensembl.org/Homo_sapiens/Location/View?r=3:44976134-44976142;db=core	3
(gcc)3	45102740	45102748	https://asia.ensembl.org/Homo_sapiens/Location/View?r=3:45102740-45102748;db=core	3
(GGC)4	45225523	45225534	https://asia.ensembl.org/Homo_sapiens/Location/View?r=3:45225523-45225534;db=core	3
(GGC)3	45225541	45225549	https://asia.ensembl.org/Homo_sapiens/Location/View?r=3:45225541-45225549;db=core	3
(GGC)3	45225679	45225687	https://asia.ensembl.org/Homo_sapiens/Location/View?r=3:45225679-45225687;db=core	3
(GGC)3	45225991	45225999	https://asia.ensembl.org/Homo_sapiens/Location/View?r=3:45225991-45225999;db=core	3
(GGC)3	45593914	45593922	https://asia.ensembl.org/Homo_sapiens/Location/View?r=3:45593914-45593922;db=core	3
(GCC)3	46834077	46834085	https://asia.ensembl.org/Homo_sapiens/Location/View?r=3:46834077-46834085;db=core	3
(GGC)3	46846162	46846170	https://asia.ensembl.org/Homo_sapiens/Location/View?r=3:46846162-46846170;db=core	3
(GGC)3	46979652	46979660	https://asia.ensembl.org/Homo_sapiens/Location/View?r=3:46979652-46979660;db=core	3
(ggc)3	47309299	47309307	https://asia.ensembl.org/Homo_sapiens/Location/View?r=3:47309299-47309307;db=core	3
(GGC)3	47356319	47356327	https://asia.ensembl.org/Homo_sapiens/Location/View?r=3:47356319-47356327;db=core	3
(GCC)3	47409942	47409950	https://asia.ensembl.org/Homo_sapiens/Location/View?r=3:47409942-47409950;db=core	3
(GGC)3	47578649	47578657	https://asia.ensembl.org/Homo_sapiens/Location/View?r=3:47578649-47578657;db=core	3
(GCC)5	47578820	47578834	https://asia.ensembl.org/Homo_sapiens/Location/View?r=3:47578820-47578834;db=core	3
(GGC)3	47846333	47846341	https://asia.ensembl.org/Homo_sapiens/Location/View?r=3:47846333-47846341;db=core	3
(GGC)3	48187910	48187918	https://asia.ensembl.org/Homo_sapiens/Location/View?r=3:48187910-48187918;db=core	3
(gcc)4	48210749	48210760	https://asia.ensembl.org/Homo_sapiens/Location/View?r=3:48210749-48210760;db=core	3
(GGC)3	48301122	48301130	https://asia.ensembl.org/Homo_sapiens/Location/View?r=3:48301122-48301130;db=core	3
(GGC)4	48504435	48504446	https://asia.ensembl.org/Homo_sapiens/Location/View?r=3:48504435-48504446;db=core	3
(GGC)3	48661179	48661187	https://asia.ensembl.org/Homo_sapiens/Location/View?r=3:48661179-48661187;db=core	3
(GCC)3	48662723	48662731	https://asia.ensembl.org/Homo_sapiens/Location/View?r=3:48662723-48662731;db=core	3
(gcc)4	48847809	48847820	https://asia.ensembl.org/Homo_sapiens/Location/View?r=3:48847809-48847820;db=core	3
(GCC)3	48919469	48919477	https://asia.ensembl.org/Homo_sapiens/Location/View?r=3:48919469-48919477;db=core	3
(GGC)3	48990354	48990362	https://asia.ensembl.org/Homo_sapiens/Location/View?r=3:48990354-48990362;db=core	3
(gcc)6	49093925	49093942	https://asia.ensembl.org/Homo_sapiens/Location/View?r=3:49093925-49093942;db=core	3
(gcc)6	49358240	49358257	https://asia.ensembl.org/Homo_sapiens/Location/View?r=3:49358240-49358257;db=core	3
(GGC)3	49411983	49411991	https://asia.ensembl.org/Homo_sapiens/Location/View?r=3:49411983-49411991;db=core	3
(ggc)4	49470330	49470341	https://asia.ensembl.org/Homo_sapiens/Location/View?r=3:49470330-49470341;db=core	3
(ggc)3	49554477	49554485	https://asia.ensembl.org/Homo_sapiens/Location/View?r=3:49554477-49554485;db=core	3
(ggc)3	49554505	49554513	https://asia.ensembl.org/Homo_sapiens/Location/View?r=3:49554505-49554513;db=core	3
(GCC)3	49650685	49650693	https://asia.ensembl.org/Homo_sapiens/Location/View?r=3:49650685-49650693;db=core	3
(ggc)3	49803241	49803249	https://asia.ensembl.org/Homo_sapiens/Location/View?r=3:49803241-49803249;db=core	3
(GCC)3	49910595	49910603	https://asia.ensembl.org/Homo_sapiens/Location/View?r=3:49910595-49910603;db=core	3
(gcc)5	50155518	50155532	https://asia.ensembl.org/Homo_sapiens/Location/View?r=3:50155518-50155532;db=core	3
(ggc)3	50236307	50236315	https://asia.ensembl.org/Homo_sapiens/Location/View?r=3:50236307-50236315;db=core	3
(GGC)3	50236364	50236372	https://asia.ensembl.org/Homo_sapiens/Location/View?r=3:50236364-50236372;db=core	3
(GGC)3	50238051	50238059	https://asia.ensembl.org/Homo_sapiens/Location/View?r=3:50238051-50238059;db=core	3
(GCC)3	50259822	50259830	https://asia.ensembl.org/Homo_sapiens/Location/View?r=3:50259822-50259830;db=core	3
(GGC)3	50296997	50297005	https://asia.ensembl.org/Homo_sapiens/Location/View?r=3:50296997-50297005;db=core	3
(GCC)3	50328033	50328041	https://asia.ensembl.org/Homo_sapiens/Location/View?r=3:50328033-50328041;db=core	3
(GCC)5	50328192	50328206	https://asia.ensembl.org/Homo_sapiens/Location/View?r=3:50328192-50328206;db=core	3
(ggc)7	50503464	50503484	https://asia.ensembl.org/Homo_sapiens/Location/View?r=3:50503464-50503484;db=core	3
(ggc)3	50530449	50530457	https://asia.ensembl.org/Homo_sapiens/Location/View?r=3:50530449-50530457;db=core	3
(GCC)3	50605323	50605331	https://asia.ensembl.org/Homo_sapiens/Location/View?r=3:50605323-50605331;db=core	3
(GGC)3	50675100	50675108	https://asia.ensembl.org/Homo_sapiens/Location/View?r=3:50675100-50675108;db=core	3
(GGC)3	51385478	51385486	https://asia.ensembl.org/Homo_sapiens/Location/View?r=3:51385478-51385486;db=core	3
(gcc)3	51391335	51391343	https://asia.ensembl.org/Homo_sapiens/Location/View?r=3:51391335-51391343;db=core	3
(gcc)3	51391743	51391751	https://asia.ensembl.org/Homo_sapiens/Location/View?r=3:51391743-51391751;db=core	3
(GGC)3	51392059	51392067	https://asia.ensembl.org/Homo_sapiens/Location/View?r=3:51392059-51392067;db=core	3
(gcc)3	51392275	51392283	https://asia.ensembl.org/Homo_sapiens/Location/View?r=3:51392275-51392283;db=core	3
(gcc)3	51538805	51538813	https://asia.ensembl.org/Homo_sapiens/Location/View?r=3:51538805-51538813;db=core	3
(ggc)3	51607713	51607721	https://asia.ensembl.org/Homo_sapiens/Location/View?r=3:51607713-51607721;db=core	3
(ggc)3	51607867	51607875	https://asia.ensembl.org/Homo_sapiens/Location/View?r=3:51607867-51607875;db=core	3
(GGC)3	51671745	51671753	https://asia.ensembl.org/Homo_sapiens/Location/View?r=3:51671745-51671753;db=core	3
(GCC)3	51956029	51956037	https://asia.ensembl.org/Homo_sapiens/Location/View?r=3:51956029-51956037;db=core	3
(GCC)4	52056301	52056312	https://asia.ensembl.org/Homo_sapiens/Location/View?r=3:52056301-52056312;db=core	3
(GGC)3	52278361	52278369	https://asia.ensembl.org/Homo_sapiens/Location/View?r=3:52278361-52278369;db=core	3
(GGC)3	52307679	52307687	https://asia.ensembl.org/Homo_sapiens/Location/View?r=3:52307679-52307687;db=core	3
(gcc)3	52424772	52424780	https://asia.ensembl.org/Homo_sapiens/Location/View?r=3:52424772-52424780;db=core	3
(GCC)3	52706102	52706110	https://asia.ensembl.org/Homo_sapiens/Location/View?r=3:52706102-52706110;db=core	3
(ggc)3	52865521	52865529	https://asia.ensembl.org/Homo_sapiens/Location/View?r=3:52865521-52865529;db=core	3
(GCC)3	53045435	53045443	https://asia.ensembl.org/Homo_sapiens/Location/View?r=3:53045435-53045443;db=core	3
(GCC)3	53045509	53045517	https://asia.ensembl.org/Homo_sapiens/Location/View?r=3:53045509-53045517;db=core	3
(GCC)5	53045635	53045649	https://asia.ensembl.org/Homo_sapiens/Location/View?r=3:53045635-53045649;db=core	3
(ggc)4	53046034	53046045	https://asia.ensembl.org/Homo_sapiens/Location/View?r=3:53046034-53046045;db=core	3
(GCC)3	53046613	53046621	https://asia.ensembl.org/Homo_sapiens/Location/View?r=3:53046613-53046621;db=core	3
(GCC)3	53130432	53130440	https://asia.ensembl.org/Homo_sapiens/Location/View?r=3:53130432-53130440;db=core	3
(GGC)4	53494721	53494732	https://asia.ensembl.org/Homo_sapiens/Location/View?r=3:53494721-53494732;db=core	3
(GCC)3	54087999	54088007	https://asia.ensembl.org/Homo_sapiens/Location/View?r=3:54087999-54088007;db=core	3
(GGC)3	54131282	54131290	https://asia.ensembl.org/Homo_sapiens/Location/View?r=3:54131282-54131290;db=core	3
(GGC)3	55482307	55482315	https://asia.ensembl.org/Homo_sapiens/Location/View?r=3:55482307-55482315;db=core	3
(ggc)3	56583905	56583913	https://asia.ensembl.org/Homo_sapiens/Location/View?r=3:56583905-56583913;db=core	3
(GCC)5	56682871	56682885	https://asia.ensembl.org/Homo_sapiens/Location/View?r=3:56682871-56682885;db=core	3
(GGC)4	56801892	56801903	https://asia.ensembl.org/Homo_sapiens/Location/View?r=3:56801892-56801903;db=core	3
(GCC)4	57228041	57228052	https://asia.ensembl.org/Homo_sapiens/Location/View?r=3:57228041-57228052;db=core	3
(GGC)3	58332826	58332834	https://asia.ensembl.org/Homo_sapiens/Location/View?r=3:58332826-58332834;db=core	3
(GGC)4	58332963	58332974	https://asia.ensembl.org/Homo_sapiens/Location/View?r=3:58332963-58332974;db=core	3
(GCC)6	58492059	58492076	https://asia.ensembl.org/Homo_sapiens/Location/View?r=3:58492059-58492076;db=core	3
(GCC)4	58492152	58492163	https://asia.ensembl.org/Homo_sapiens/Location/View?r=3:58492152-58492163;db=core	3
(GGC)3	58492294	58492302	https://asia.ensembl.org/Homo_sapiens/Location/View?r=3:58492294-58492302;db=core	3
(GCC)3	60803344	60803352	https://asia.ensembl.org/Homo_sapiens/Location/View?r=3:60803344-60803352;db=core	3
(GGC)3	61564854	61564862	https://asia.ensembl.org/Homo_sapiens/Location/View?r=3:61564854-61564862;db=core	3
(GGC)4	62368858	62368869	https://asia.ensembl.org/Homo_sapiens/Location/View?r=3:62368858-62368869;db=core	3
(ggc)6	62369049	62369066	https://asia.ensembl.org/Homo_sapiens/Location/View?r=3:62369049-62369066;db=core	3
(GCC)4	62371962	62371973	https://asia.ensembl.org/Homo_sapiens/Location/View?r=3:62371962-62371973;db=core	3
(GGC)3	62373431	62373439	https://asia.ensembl.org/Homo_sapiens/Location/View?r=3:62373431-62373439;db=core	3
(GCC)3	62373481	62373489	https://asia.ensembl.org/Homo_sapiens/Location/View?r=3:62373481-62373489;db=core	3
(gcc)3	62874768	62874776	https://asia.ensembl.org/Homo_sapiens/Location/View?r=3:62874768-62874776;db=core	3
(GCC)3	63573848	63573856	https://asia.ensembl.org/Homo_sapiens/Location/View?r=3:63573848-63573856;db=core	3
(GGC)3	63863842	63863850	https://asia.ensembl.org/Homo_sapiens/Location/View?r=3:63863842-63863850;db=core	3
(GGC)3	63863900	63863908	https://asia.ensembl.org/Homo_sapiens/Location/View?r=3:63863900-63863908;db=core	3
(GCC)3	65597701	65597709	https://asia.ensembl.org/Homo_sapiens/Location/View?r=3:65597701-65597709;db=core	3
(ggc)3	67550915	67550923	https://asia.ensembl.org/Homo_sapiens/Location/View?r=3:67550915-67550923;db=core	3
(GGC)3	69052107	69052115	https://asia.ensembl.org/Homo_sapiens/Location/View?r=3:69052107-69052115;db=core	3
(GGC)3	69080255	69080263	https://asia.ensembl.org/Homo_sapiens/Location/View?r=3:69080255-69080263;db=core	3
(gcc)6	69084995	69085012	https://asia.ensembl.org/Homo_sapiens/Location/View?r=3:69084995-69085012;db=core	3
(ggc)6	71583807	71583824	https://asia.ensembl.org/Homo_sapiens/Location/View?r=3:71583807-71583824;db=core	3
(ggc)3	71725286	71725294	https://asia.ensembl.org/Homo_sapiens/Location/View?r=3:71725286-71725294;db=core	3
(GGC)4	71753600	71753611	https://asia.ensembl.org/Homo_sapiens/Location/View?r=3:71753600-71753611;db=core	3
(GGC)4	71753865	71753876	https://asia.ensembl.org/Homo_sapiens/Location/View?r=3:71753865-71753876;db=core	3
(GGC)3	72446876	72446884	https://asia.ensembl.org/Homo_sapiens/Location/View?r=3:72446876-72446884;db=core	3
(GGC)3	72447199	72447207	https://asia.ensembl.org/Homo_sapiens/Location/View?r=3:72447199-72447207;db=core	3
(GCC)3	72888168	72888176	https://asia.ensembl.org/Homo_sapiens/Location/View?r=3:72888168-72888176;db=core	3
(GCC)5	72888208	72888222	https://asia.ensembl.org/Homo_sapiens/Location/View?r=3:72888208-72888222;db=core	3
(GGC)3	72888250	72888258	https://asia.ensembl.org/Homo_sapiens/Location/View?r=3:72888250-72888258;db=core	3
(gcc)3	72929032	72929040	https://asia.ensembl.org/Homo_sapiens/Location/View?r=3:72929032-72929040;db=core	3
(GCC)4	74614520	74614531	https://asia.ensembl.org/Homo_sapiens/Location/View?r=3:74614520-74614531;db=core	3
(GGC)3	74614889	74614897	https://asia.ensembl.org/Homo_sapiens/Location/View?r=3:74614889-74614897;db=core	3
(ggc)3	75670214	75670222	https://asia.ensembl.org/Homo_sapiens/Location/View?r=3:75670214-75670222;db=core	3
(GCC)3	77005202	77005210	https://asia.ensembl.org/Homo_sapiens/Location/View?r=3:77005202-77005210;db=core	3
(GCC)4	82808023	82808034	https://asia.ensembl.org/Homo_sapiens/Location/View?r=3:82808023-82808034;db=core	3
(gcc)3	84959063	84959071	https://asia.ensembl.org/Homo_sapiens/Location/View?r=3:84959063-84959071;db=core	3
(gcc)3	86990773	86990781	https://asia.ensembl.org/Homo_sapiens/Location/View?r=3:86990773-86990781;db=core	3
(ggc)3	88058634	88058642	https://asia.ensembl.org/Homo_sapiens/Location/View?r=3:88058634-88058642;db=core	3
(ggc)3	93761450	93761458	https://asia.ensembl.org/Homo_sapiens/Location/View?r=3:93761450-93761458;db=core	3
(GCC)3	98657580	98657588	https://asia.ensembl.org/Homo_sapiens/Location/View?r=3:98657580-98657588;db=core	3
(ggc)3	98901254	98901262	https://asia.ensembl.org/Homo_sapiens/Location/View?r=3:98901254-98901262;db=core	3
(GGC)3	100709694	100709702	https://asia.ensembl.org/Homo_sapiens/Location/View?r=3:100709694-100709702;db=core	3
(GGC)4	106112757	106112768	https://asia.ensembl.org/Homo_sapiens/Location/View?r=3:106112757-106112768;db=core	3
(GGC)3	107431281	107431289	https://asia.ensembl.org/Homo_sapiens/Location/View?r=3:107431281-107431289;db=core	3
(GGC)3	107431494	107431502	https://asia.ensembl.org/Homo_sapiens/Location/View?r=3:107431494-107431502;db=core	3
(GCC)3	107523297	107523305	https://asia.ensembl.org/Homo_sapiens/Location/View?r=3:107523297-107523305;db=core	3
(gcc)4	108090960	108090971	https://asia.ensembl.org/Homo_sapiens/Location/View?r=3:108090960-108090971;db=core	3
(GCC)3	108222389	108222397	https://asia.ensembl.org/Homo_sapiens/Location/View?r=3:108222389-108222397;db=core	3
(ggc)4	111071787	111071798	https://asia.ensembl.org/Homo_sapiens/Location/View?r=3:111071787-111071798;db=core	3
(GGC)3	111859831	111859839	https://asia.ensembl.org/Homo_sapiens/Location/View?r=3:111859831-111859839;db=core	3
(GGC)3	113103026	113103034	https://asia.ensembl.org/Homo_sapiens/Location/View?r=3:113103026-113103034;db=core	3
(GCC)3	113515098	113515106	https://asia.ensembl.org/Homo_sapiens/Location/View?r=3:113515098-113515106;db=core	3
(GGC)3	113696397	113696405	https://asia.ensembl.org/Homo_sapiens/Location/View?r=3:113696397-113696405;db=core	3
(GGC)3	113699012	113699020	https://asia.ensembl.org/Homo_sapiens/Location/View?r=3:113699012-113699020;db=core	3
(gcc)3	115598887	115598895	https://asia.ensembl.org/Homo_sapiens/Location/View?r=3:115598887-115598895;db=core	3
(gcc)3	119242890	119242898	https://asia.ensembl.org/Homo_sapiens/Location/View?r=3:119242890-119242898;db=core	3
(gcc)3	119242929	119242937	https://asia.ensembl.org/Homo_sapiens/Location/View?r=3:119242929-119242937;db=core	3
(GGC)3	120094051	120094059	https://asia.ensembl.org/Homo_sapiens/Location/View?r=3:120094051-120094059;db=core	3
(GGC)3	120094091	120094099	https://asia.ensembl.org/Homo_sapiens/Location/View?r=3:120094091-120094099;db=core	3
(ggc)8	120094384	120094407	https://asia.ensembl.org/Homo_sapiens/Location/View?r=3:120094384-120094407;db=core	3
(ggc)3	120451303	120451311	https://asia.ensembl.org/Homo_sapiens/Location/View?r=3:120451303-120451311;db=core	3
(ggc)3	121190673	121190681	https://asia.ensembl.org/Homo_sapiens/Location/View?r=3:121190673-121190681;db=core	3
(ggc)3	122546314	122546322	https://asia.ensembl.org/Homo_sapiens/Location/View?r=3:122546314-122546322;db=core	3
(ggc)5	122795284	122795298	https://asia.ensembl.org/Homo_sapiens/Location/View?r=3:122795284-122795298;db=core	3
(ggc)3	123026940	123026948	https://asia.ensembl.org/Homo_sapiens/Location/View?r=3:123026940-123026948;db=core	3
(ggc)3	123026955	123026963	https://asia.ensembl.org/Homo_sapiens/Location/View?r=3:123026955-123026963;db=core	3
(GCC)3	123406907	123406915	https://asia.ensembl.org/Homo_sapiens/Location/View?r=3:123406907-123406915;db=core	3
(GCC)4	123448117	123448128	https://asia.ensembl.org/Homo_sapiens/Location/View?r=3:123448117-123448128;db=core	3
(GCC)5	123448131	123448145	https://asia.ensembl.org/Homo_sapiens/Location/View?r=3:123448131-123448145;db=core	3
(ggc)5	124033206	124033220	https://asia.ensembl.org/Homo_sapiens/Location/View?r=3:124033206-124033220;db=core	3
(GGC)3	124584732	124584740	https://asia.ensembl.org/Homo_sapiens/Location/View?r=3:124584732-124584740;db=core	3
(GGC)3	125055693	125055701	https://asia.ensembl.org/Homo_sapiens/Location/View?r=3:125055693-125055701;db=core	3
(GGC)3	125375138	125375146	https://asia.ensembl.org/Homo_sapiens/Location/View?r=3:125375138-125375146;db=core	3
(GCC)3	125595509	125595517	https://asia.ensembl.org/Homo_sapiens/Location/View?r=3:125595509-125595517;db=core	3
(ggc)3	125715747	125715755	https://asia.ensembl.org/Homo_sapiens/Location/View?r=3:125715747-125715755;db=core	3
(GGC)3	125756087	125756095	https://asia.ensembl.org/Homo_sapiens/Location/View?r=3:125756087-125756095;db=core	3
(GCC)3	125958235	125958243	https://asia.ensembl.org/Homo_sapiens/Location/View?r=3:125958235-125958243;db=core	3
(GGC)3	126084106	126084114	https://asia.ensembl.org/Homo_sapiens/Location/View?r=3:126084106-126084114;db=core	3
(GGC)3	126356987	126356995	https://asia.ensembl.org/Homo_sapiens/Location/View?r=3:126356987-126356995;db=core	3
(GGC)3	126357305	126357313	https://asia.ensembl.org/Homo_sapiens/Location/View?r=3:126357305-126357313;db=core	3
(GGC)3	126395036	126395044	https://asia.ensembl.org/Homo_sapiens/Location/View?r=3:126395036-126395044;db=core	3
(ggc)3	126475747	126475755	https://asia.ensembl.org/Homo_sapiens/Location/View?r=3:126475747-126475755;db=core	3
(GCC)3	126511489	126511497	https://asia.ensembl.org/Homo_sapiens/Location/View?r=3:126511489-126511497;db=core	3
(GCC)3	126542440	126542448	https://asia.ensembl.org/Homo_sapiens/Location/View?r=3:126542440-126542448;db=core	3
(gcc)3	127309097	127309105	https://asia.ensembl.org/Homo_sapiens/Location/View?r=3:127309097-127309105;db=core	3
(GCC)3	127542575	127542583	https://asia.ensembl.org/Homo_sapiens/Location/View?r=3:127542575-127542583;db=core	3
(GCC)3	127591242	127591250	https://asia.ensembl.org/Homo_sapiens/Location/View?r=3:127591242-127591250;db=core	3
(GGC)3	127629323	127629331	https://asia.ensembl.org/Homo_sapiens/Location/View?r=3:127629323-127629331;db=core	3
(GCC)3	128077040	128077048	https://asia.ensembl.org/Homo_sapiens/Location/View?r=3:128077040-128077048;db=core	3
(ggc)5	128153492	128153506	https://asia.ensembl.org/Homo_sapiens/Location/View?r=3:128153492-128153506;db=core	3
(GGC)3	128498018	128498026	https://asia.ensembl.org/Homo_sapiens/Location/View?r=3:128498018-128498026;db=core	3
(GCC)3	128650617	128650625	https://asia.ensembl.org/Homo_sapiens/Location/View?r=3:128650617-128650625;db=core	3
(GGC)3	128681107	128681115	https://asia.ensembl.org/Homo_sapiens/Location/View?r=3:128681107-128681115;db=core	3
(GGC)3	128681167	128681175	https://asia.ensembl.org/Homo_sapiens/Location/View?r=3:128681167-128681175;db=core	3
(GGC)3	128726147	128726155	https://asia.ensembl.org/Homo_sapiens/Location/View?r=3:128726147-128726155;db=core	3
(ggc)3	128726203	128726211	https://asia.ensembl.org/Homo_sapiens/Location/View?r=3:128726203-128726211;db=core	3
(GGC)3	129027253	129027261	https://asia.ensembl.org/Homo_sapiens/Location/View?r=3:129027253-129027261;db=core	3
(GGC)3	129183617	129183625	https://asia.ensembl.org/Homo_sapiens/Location/View?r=3:129183617-129183625;db=core	3
(GGC)4	129606585	129606596	https://asia.ensembl.org/Homo_sapiens/Location/View?r=3:129606585-129606596;db=core	3
(GCC)4	129606991	129607002	https://asia.ensembl.org/Homo_sapiens/Location/View?r=3:129606991-129607002;db=core	3
(GCC)4	129893636	129893647	https://asia.ensembl.org/Homo_sapiens/Location/View?r=3:129893636-129893647;db=core	3
(GCC)3	129974672	129974680	https://asia.ensembl.org/Homo_sapiens/Location/View?r=3:129974672-129974680;db=core	3
(GCC)3	130013530	130013538	https://asia.ensembl.org/Homo_sapiens/Location/View?r=3:130013530-130013538;db=core	3
(GGC)3	131362281	131362289	https://asia.ensembl.org/Homo_sapiens/Location/View?r=3:131362281-131362289;db=core	3
(GGC)3	132035141	132035149	https://asia.ensembl.org/Homo_sapiens/Location/View?r=3:132035141-132035149;db=core	3
(GGC)3	132660487	132660495	https://asia.ensembl.org/Homo_sapiens/Location/View?r=3:132660487-132660495;db=core	3
(GCC)3	133895111	133895119	https://asia.ensembl.org/Homo_sapiens/Location/View?r=3:133895111-133895119;db=core	3
(GGC)3	133996558	133996566	https://asia.ensembl.org/Homo_sapiens/Location/View?r=3:133996558-133996566;db=core	3
(GCC)3	134029962	134029970	https://asia.ensembl.org/Homo_sapiens/Location/View?r=3:134029962-134029970;db=core	3
(ggc)3	134250513	134250521	https://asia.ensembl.org/Homo_sapiens/Location/View?r=3:134250513-134250521;db=core	3
(ggc)4	134250571	134250582	https://asia.ensembl.org/Homo_sapiens/Location/View?r=3:134250571-134250582;db=core	3
(GCC)6	134250655	134250672	https://asia.ensembl.org/Homo_sapiens/Location/View?r=3:134250655-134250672;db=core	3
(ggc)3	134406836	134406844	https://asia.ensembl.org/Homo_sapiens/Location/View?r=3:134406836-134406844;db=core	3
(GCC)4	135966502	135966513	https://asia.ensembl.org/Homo_sapiens/Location/View?r=3:135966502-135966513;db=core	3
(ggc)3	136195604	136195612	https://asia.ensembl.org/Homo_sapiens/Location/View?r=3:136195604-136195612;db=core	3
(GCC)3	136195850	136195858	https://asia.ensembl.org/Homo_sapiens/Location/View?r=3:136195850-136195858;db=core	3
(GCC)4	136196022	136196033	https://asia.ensembl.org/Homo_sapiens/Location/View?r=3:136196022-136196033;db=core	3
(GGC)3	136250377	136250385	https://asia.ensembl.org/Homo_sapiens/Location/View?r=3:136250377-136250385;db=core	3
(GCC)3	138435047	138435055	https://asia.ensembl.org/Homo_sapiens/Location/View?r=3:138435047-138435055;db=core	3
(ggc)4	138609087	138609098	https://asia.ensembl.org/Homo_sapiens/Location/View?r=3:138609087-138609098;db=core	3
(gcc)3	138785296	138785304	https://asia.ensembl.org/Homo_sapiens/Location/View?r=3:138785296-138785304;db=core	3
(ggc)7	138835012	138835032	https://asia.ensembl.org/Homo_sapiens/Location/View?r=3:138835012-138835032;db=core	3
(ggc)3	138945505	138945513	https://asia.ensembl.org/Homo_sapiens/Location/View?r=3:138945505-138945513;db=core	3
(GGC)3	138946252	138946260	https://asia.ensembl.org/Homo_sapiens/Location/View?r=3:138946252-138946260;db=core	3
(GGC)3	139389431	139389439	https://asia.ensembl.org/Homo_sapiens/Location/View?r=3:139389431-139389439;db=core	3
(GGC)3	139935338	139935346	https://asia.ensembl.org/Homo_sapiens/Location/View?r=3:139935338-139935346;db=core	3
(ggc)3	141030455	141030463	https://asia.ensembl.org/Homo_sapiens/Location/View?r=3:141030455-141030463;db=core	3
(ggc)4	141051396	141051407	https://asia.ensembl.org/Homo_sapiens/Location/View?r=3:141051396-141051407;db=core	3
(ggc)4	141051420	141051431	https://asia.ensembl.org/Homo_sapiens/Location/View?r=3:141051420-141051431;db=core	3
(GGC)4	141051900	141051911	https://asia.ensembl.org/Homo_sapiens/Location/View?r=3:141051900-141051911;db=core	3
(GGC)4	141487085	141487096	https://asia.ensembl.org/Homo_sapiens/Location/View?r=3:141487085-141487096;db=core	3
(gcc)3	141738703	141738711	https://asia.ensembl.org/Homo_sapiens/Location/View?r=3:141738703-141738711;db=core	3
(GGC)4	141877039	141877050	https://asia.ensembl.org/Homo_sapiens/Location/View?r=3:141877039-141877050;db=core	3
(GGC)3	142149280	142149288	https://asia.ensembl.org/Homo_sapiens/Location/View?r=3:142149280-142149288;db=core	3
(GCC)3	142832998	142833006	https://asia.ensembl.org/Homo_sapiens/Location/View?r=3:142832998-142833006;db=core	3
(GCC)4	143120071	143120082	https://asia.ensembl.org/Homo_sapiens/Location/View?r=3:143120071-143120082;db=core	3
(GGC)3	147361260	147361268	https://asia.ensembl.org/Homo_sapiens/Location/View?r=3:147361260-147361268;db=core	3
(GGC)3	147361312	147361320	https://asia.ensembl.org/Homo_sapiens/Location/View?r=3:147361312-147361320;db=core	3
(GGC)4	147390836	147390847	https://asia.ensembl.org/Homo_sapiens/Location/View?r=3:147390836-147390847;db=core	3
(GGC)3	147391053	147391061	https://asia.ensembl.org/Homo_sapiens/Location/View?r=3:147391053-147391061;db=core	3
(GGC)3	147421380	147421388	https://asia.ensembl.org/Homo_sapiens/Location/View?r=3:147421380-147421388;db=core	3
(gcc)4	148987666	148987677	https://asia.ensembl.org/Homo_sapiens/Location/View?r=3:148987666-148987677;db=core	3
(gcc)3	148991700	148991708	https://asia.ensembl.org/Homo_sapiens/Location/View?r=3:148991700-148991708;db=core	3
(ggc)3	149444979	149444987	https://asia.ensembl.org/Homo_sapiens/Location/View?r=3:149444979-149444987;db=core	3
(GCC)3	149970204	149970212	https://asia.ensembl.org/Homo_sapiens/Location/View?r=3:149970204-149970212;db=core	3
(GCC)3	149970509	149970517	https://asia.ensembl.org/Homo_sapiens/Location/View?r=3:149970509-149970517;db=core	3
(ggc)4	149970926	149970937	https://asia.ensembl.org/Homo_sapiens/Location/View?r=3:149970926-149970937;db=core	3
(ggc)5	150050727	150050741	https://asia.ensembl.org/Homo_sapiens/Location/View?r=3:150050727-150050741;db=core	3
(GGC)3	150050806	150050814	https://asia.ensembl.org/Homo_sapiens/Location/View?r=3:150050806-150050814;db=core	3
(GCC)4	150408522	150408533	https://asia.ensembl.org/Homo_sapiens/Location/View?r=3:150408522-150408533;db=core	3
(GGC)3	150409712	150409720	https://asia.ensembl.org/Homo_sapiens/Location/View?r=3:150409712-150409720;db=core	3
(GCC)4	150410174	150410185	https://asia.ensembl.org/Homo_sapiens/Location/View?r=3:150410174-150410185;db=core	3
(gcc)3	150546417	150546425	https://asia.ensembl.org/Homo_sapiens/Location/View?r=3:150546417-150546425;db=core	3
(GCC)3	152835755	152835763	https://asia.ensembl.org/Homo_sapiens/Location/View?r=3:152835755-152835763;db=core	3
(GCC)3	153161929	153161937	https://asia.ensembl.org/Homo_sapiens/Location/View?r=3:153161929-153161937;db=core	3
(gcc)4	153162498	153162509	https://asia.ensembl.org/Homo_sapiens/Location/View?r=3:153162498-153162509;db=core	3
(GGC)3	155870551	155870559	https://asia.ensembl.org/Homo_sapiens/Location/View?r=3:155870551-155870559;db=core	3
(GGC)3	157089162	157089170	https://asia.ensembl.org/Homo_sapiens/Location/View?r=3:157089162-157089170;db=core	3
(GGC)3	157120192	157120200	https://asia.ensembl.org/Homo_sapiens/Location/View?r=3:157120192-157120200;db=core	3
(GGC)3	158652134	158652142	https://asia.ensembl.org/Homo_sapiens/Location/View?r=3:158652134-158652142;db=core	3
(ggc)4	160226115	160226126	https://asia.ensembl.org/Homo_sapiens/Location/View?r=3:160226115-160226126;db=core	3
(GCC)3	160226442	160226450	https://asia.ensembl.org/Homo_sapiens/Location/View?r=3:160226442-160226450;db=core	3
(GCC)4	160400876	160400887	https://asia.ensembl.org/Homo_sapiens/Location/View?r=3:160400876-160400887;db=core	3
(GCC)3	160565367	160565375	https://asia.ensembl.org/Homo_sapiens/Location/View?r=3:160565367-160565375;db=core	3
(GGC)3	160565513	160565521	https://asia.ensembl.org/Homo_sapiens/Location/View?r=3:160565513-160565521;db=core	3
(GGC)3	160754899	160754907	https://asia.ensembl.org/Homo_sapiens/Location/View?r=3:160754899-160754907;db=core	3
(GGC)3	168249908	168249916	https://asia.ensembl.org/Homo_sapiens/Location/View?r=3:168249908-168249916;db=core	3
(gcc)3	169769532	169769540	https://asia.ensembl.org/Homo_sapiens/Location/View?r=3:169769532-169769540;db=core	3
(GGC)3	170222459	170222467	https://asia.ensembl.org/Homo_sapiens/Location/View?r=3:170222459-170222467;db=core	3
(GGC)3	170222714	170222722	https://asia.ensembl.org/Homo_sapiens/Location/View?r=3:170222714-170222722;db=core	3
(GGC)3	170357036	170357044	https://asia.ensembl.org/Homo_sapiens/Location/View?r=3:170357036-170357044;db=core	3
(ggc)4	170357486	170357497	https://asia.ensembl.org/Homo_sapiens/Location/View?r=3:170357486-170357497;db=core	3
(GGC)3	170419308	170419316	https://asia.ensembl.org/Homo_sapiens/Location/View?r=3:170419308-170419316;db=core	3
(GCC)3	170908168	170908176	https://asia.ensembl.org/Homo_sapiens/Location/View?r=3:170908168-170908176;db=core	3
(GCC)3	171157467	171157475	https://asia.ensembl.org/Homo_sapiens/Location/View?r=3:171157467-171157475;db=core	3
(gcc)3	172078123	172078131	https://asia.ensembl.org/Homo_sapiens/Location/View?r=3:172078123-172078131;db=core	3
[truncated: 7,659 more rows]
